# Supplementary material for: Diastereoselective synthesis of chiral 3-substituted isoindolinonesviarhodium(iii)-catalyzed oxidative C–H olefination/annulation
Source: Royal Society of Chemistry journal article supplement (doi:10.1039/d1ob00656h), 2021-01-01
Supplement: d1ob00656h1.pdf [file d1ob00656h1.pdf]

## Supporting Information

### **Diastereoselective synthesis of chiral 3-substituted isoindolinones via rhodium(III)-catalyzed oxidative C-H olefination/annulation**

Xue-Hong Li, Jun-Fang Gong,<sup>\*</sup> and Mao-Ping Song<sup>\*</sup>

*College of Chemistry, Green Catalysis Center, Zhengzhou University, Zhengzhou 450001,*

*People's Republic of China*

E-mail: mpsong@zzu.edu.cn (M.-P. Song) or gongjf@zzu.edu.cn (J.-F. Gong).

#### **Table of contents**

|                                                                                                           |     |
|-----------------------------------------------------------------------------------------------------------|-----|
| 1 General procedure for the preparation of substrates .....                                               | S2  |
| 2 Optimization of the reaction conditions .....                                                           | S7  |
| 3 Mechanistic investigations .....                                                                        | S10 |
| 3.1 Synthesis of [D <sub>5</sub> ]- <b>1a</b> .....                                                       | S10 |
| 3.2 H/D exchange experiments .....                                                                        | S11 |
| 3.3 Intermolecular competition KIE .....                                                                  | S13 |
| 3.4 Parallel experiments .....                                                                            | S13 |
| 3.5 Competition experiment .....                                                                          | S14 |
| 4 Removal of <i>N</i> -sulfinyl and further transformations .....                                         | S14 |
| 4.1 Removal of <i>N</i> -sulfinyl .....                                                                   | S14 |
| 4.2 Synthesis of ( <i>S</i> )-PD172938 .....                                                              | S15 |
| 4.3 Synthesis of compound <b>8</b> .....                                                                  | S16 |
| 4.4 Synthesis of compound <b>10</b> .....                                                                 | S17 |
| 4.5 Synthesis of compound <b>11</b> by <i>N</i> -arylation of isoindolinone ( <i>S</i> )- <b>4b</b> ..... | S17 |
| 5 Crystal data of ( <i>R,R</i> )- <b>3aa</b> and ( <i>R,S</i> )- <b>3ab</b> .....                         | S18 |
| 6 References .....                                                                                        | S21 |
| 7 NMR and HPLC spectra .....                                                                              | S22 |

## 1 General procedure for the preparation of substrates

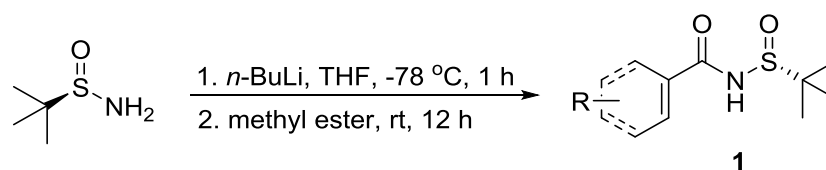

Following the literature reported method,<sup>[1]</sup> and at a temperature of  $-78\text{ }^{\circ}\text{C}$ , *n*-BuLi (12.0 mL, 30.0 mmol, 3.0 equiv, 2.5 M in THF) was added dropwise to the solution of *R*-(+)-2-methyl-2-propanesulfonamide (1.21 g, 10.0 mmol) dissolved in dry THF (40.0 mL) under Ar atmosphere. Upon stirring for 1 h, methyl ester (3.0 equiv) was slowly added, followed by stirring for additional 12 h at room temperature. The reaction was then quenched by addition of the saturated  $\text{NH}_4\text{Cl}$  aqueous solution and the organic phase was extracted three times using EtOAc (50 mL). The organic phase was combined, washed with brine, dried with anhydrous  $\text{Na}_2\text{SO}_4$ , filtered and concentrated *in vacuo*. The residue was purified by flash column chromatography using petroleum ether/EtOAc as the eluent to give substrate **1**.

### **(*R*)-*N*-(*tert*-butylsulfinyl)benzamide (**1a**).**

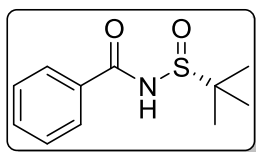

$R_f = 0.3$  (Petroleum ether/EtOAc = 3/2). White solid (1.13 g, 50%), mp.  $145\text{-}146\text{ }^{\circ}\text{C}$ .  $[\alpha]_D^{20} = -26.4$  ( $c$  0.600,  $\text{CH}_2\text{Cl}_2$ ).  $^1\text{H}$  NMR (400 MHz,  $\text{CDCl}_3$ ):  $\delta$  7.85 (d,  $J = 7.4$  Hz, 2H), 7.57-7.53 (m, 1H), 7.46-7.43 (m, 2H), 1.33 (s, 9H).  $^{13}\text{C}\{^1\text{H}\}$  NMR (100 MHz,  $\text{CDCl}_3$ ):  $\delta$  168.0, 132.9, 132.3, 128.7, 127.9, 57.6, 22.2. HRMS (positive ESI):  $[\text{M}+\text{Na}]^+$  calcd for  $\text{C}_{11}\text{H}_{15}\text{NNaO}_2\text{S}^+$ : 248.0716. Found: 248.0713.

### **(*R*)-*N*-(*tert*-butylsulfinyl)-4-methylbenzamide (**1b**).**

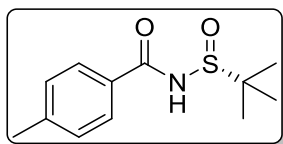

$R_f = 0.2$  (Petroleum ether/EtOAc = 3/2). White solid (1.32 g, 55%), mp.  $166\text{-}167\text{ }^{\circ}\text{C}$ .  $[\alpha]_D^{20} = -16.7$  ( $c$  0.600,  $\text{CH}_2\text{Cl}_2$ ).  $^1\text{H}$  NMR (400 MHz,  $\text{CDCl}_3$ ):  $\delta$  7.73 (d,  $J = 8.2$  Hz, 2H), 7.65 (br s, 1H), 7.27 (d,  $J = 5.8$  Hz, 2H), 2.42 (s, 3H), 1.34 (s, 9H).  $^{13}\text{C}\{^1\text{H}\}$  NMR (100 MHz,  $\text{CDCl}_3$ ):  $\delta$  167.4, 143.8, 129.5, 129.3, 127.8, 57.5, 22.1, 21.6. HRMS (positive ESI):  $[\text{M}+\text{Na}]^+$  calcd for  $\text{C}_{12}\text{H}_{17}\text{NNaO}_2\text{S}^+$ : 262.0872. Found: 262.0870.

**(R)-N-(tert-butylsulfinyl)-4-methoxybenzamide (1c).**

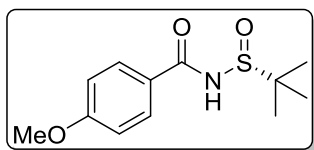

$R_f = 0.3$  (Petroleum ether/EtOAc = 3/2). White solid (1.58 g, 62%), mp. 139-140 °C.  $[\alpha]_D^{20} = -13.5$  ( $c$  0.600,  $\text{CH}_2\text{Cl}_2$ ).  $^1\text{H NMR}$  (400 MHz,  $\text{CDCl}_3$ ):  $\delta$  7.97 (br s, 1H), 7.83 (d,  $J = 8.9$  Hz, 2H), 6.94 (d,  $J = 8.8$  Hz, 2H), 3.86 (s, 3H), 1.34 (s, 9H).  $^{13}\text{C}\{^1\text{H}\}$  NMR (100 MHz,  $\text{CDCl}_3$ ):  $\delta$  167.0, 163.4, 130.0, 124.3, 114.0, 57.5, 55.5, 22.2. HRMS (positive ESI):  $[\text{M}+\text{Na}]^+$  calcd for  $\text{C}_{12}\text{H}_{17}\text{NNaO}_3\text{S}^+$ : 278.0821. Found: 278.0819.

**(R)-4-(tert-butyl)-N-(tert-butylsulfinyl)benzamide (1d).**

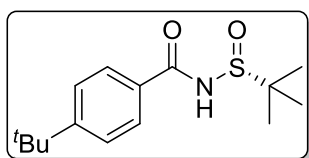

$R_f = 0.4$  (Petroleum ether/EtOAc = 3/2). Yellow solid (1.27 g, 45%), mp. 132-133 °C.  $[\alpha]_D^{20} = -12.8$  ( $c$  0.600,  $\text{CH}_2\text{Cl}_2$ ).  $^1\text{H NMR}$  (600 MHz,  $\text{CDCl}_3$ ):  $\delta$  7.78 (d,  $J = 8.3$  Hz, 2H), 7.63 (br s, 1H), 7.49 (d,  $J = 8.4$  Hz, 2H), 1.342 (s, 9H), 1.338 (s, 9H).  $^{13}\text{C}\{^1\text{H}\}$  NMR (150 MHz,  $\text{CDCl}_3$ ):  $\delta$  167.3, 156.8, 129.3, 127.7, 125.9, 57.5, 35.1, 31.1, 22.1. HRMS (positive ESI):  $[\text{M}+\text{Na}]^+$  calcd for  $\text{C}_{15}\text{H}_{23}\text{NNaO}_2\text{S}^+$ : 304.1342. Found: 304.1339.

**(R)-4-bromo-N-(tert-butylsulfinyl)benzamide (1e).**

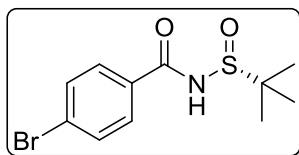

$R_f = 0.3$  (Petroleum ether/EtOAc = 3/2). Yellow solid (2.04 g, 67%), mp. 78-79 °C.  $[\alpha]_D^{20} = +20.3$  ( $c$  0.600,  $\text{CH}_2\text{Cl}_2$ ).  $^1\text{H NMR}$  (400 MHz,  $\text{CDCl}_3$ ):  $\delta$  8.06 (br s, 1H), 7.73 (d,  $J = 8.6$  Hz, 2H), 7.61 (d,  $J = 8.6$  Hz, 2H), 1.34 (s, 9H).  $^{13}\text{C}\{^1\text{H}\}$  NMR (100 MHz,  $\text{CDCl}_3$ ):  $\delta$  166.8, 132.1, 130.9, 129.5, 128.0, 57.9, 22.2. HRMS (positive ESI):  $[\text{M}+\text{Na}]^+$  calcd for  $\text{C}_{11}\text{H}_{14}\text{BrNNaO}_2\text{S}^+$ : 325.9821. Found: 325.9820.

**(R)-N-(tert-butylsulfinyl)-4-fluorobenzamide (1f).**

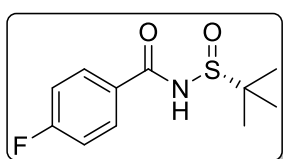

$R_f = 0.3$  (Petroleum ether/EtOAc =3/2). Pale yellow solid (1.02 g, 42%), mp. 144-145 °C.  $[\alpha]_D^{20} = -27.9$  ( $c$  0.600,  $\text{CH}_2\text{Cl}_2$ ).  $^1\text{H}$  NMR (400 MHz,  $\text{CDCl}_3$ ):  $\delta$  8.16 (br s, 1H), 7.91-7.88 (m, 2H), 7.17-7.12 (m, 2H), 1.35 (s, 9H).  $^{13}\text{C}\{^1\text{H}\}$  NMR (100 MHz,  $\text{CDCl}_3$ ):  $\delta$  166.6, 165.6 (d,  $J_{\text{C-F}} = 253.1$  Hz), 130.5 (d,  $J_{\text{C-F}} = 9.1$  Hz), 128.2 (d,  $J_{\text{C-F}} = 2.9$  Hz), 116.0 (d,  $J_{\text{C-F}} = 22.0$  Hz), 57.8, 22.2.  $^{19}\text{F}$  NMR (565 MHz,  $\text{CDCl}_3$ ):  $\delta$  -105.2. HRMS (positive ESI):  $[\text{M}+\text{Na}]^+$  calcd for  $\text{C}_{11}\text{H}_{14}\text{FNNaO}_2\text{S}^+$ : 266.0621. Found: 266.0618.

**(R)-N-(tert-butylsulfinyl)-4-(trifluoromethyl)benzamide (1g).**

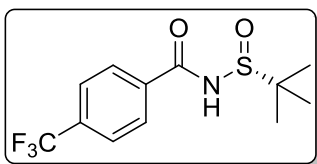

$R_f = 0.3$  (Petroleum ether/EtOAc =3/2). Pale yellow solid (1.80 g, 61%), mp. 141-142 °C.  $[\alpha]_D^{20} = -49.8$  ( $c$  0.600,  $\text{CH}_2\text{Cl}_2$ ).  $^1\text{H}$  NMR (400 MHz,  $\text{CDCl}_3$ ):  $\delta$  9.06 (br s, 1H), 8.00 (d,  $J = 6.0$  Hz, 2H), 7.65 (br s, 2H), 1.32 (s, 9H).  $^{13}\text{C}\{^1\text{H}\}$  NMR (100 MHz,  $\text{CDCl}_3$ ):  $\delta$  167.2, 135.3, 134.1 (q,  $J = 32.8$  Hz), 128.7, 125.6, 123.6 (q,  $J_{\text{C-F}} = 270.6$  Hz), 58.4, 22.2.  $^{19}\text{F}$  NMR (376 MHz,  $\text{CDCl}_3$ ):  $\delta$  -63.2. HRMS (positive ESI):  $[\text{M}+\text{Na}]^+$  calcd for  $\text{C}_{12}\text{H}_{14}\text{F}_3\text{NNaO}_2\text{S}^+$ : 316.0590. Found: 316.0629.

**(R)-N-(tert-butylsulfinyl)-4-chlorobenzamide (1h).**

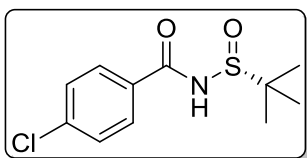

$R_f = 0.3$  (Petroleum ether/EtOAc =3/2). Yellow solid (1.68 g, 65%), mp. 156-157 °C.  $[\alpha]_D^{20} = +14.2$  ( $c$  0.600,  $\text{CH}_2\text{Cl}_2$ ).  $^1\text{H}$  NMR (400 MHz,  $\text{CDCl}_3$ ):  $\delta$  8.62 (br s, 1H), 7.82 (d,  $J = 8.5$  Hz, 2H), 7.41 (d,  $J = 8.3$  Hz, 2H), 1.32 (s, 9H).  $^{13}\text{C}\{^1\text{H}\}$  NMR (100 MHz,  $\text{CDCl}_3$ ):  $\delta$  166.8, 139.4, 130.3, 129.5, 129.0, 58.0, 22.2. HRMS (positive ESI):  $[\text{M}+\text{Na}]^+$  calcd for  $\text{C}_{11}\text{H}_{14}\text{ClNNaO}_2\text{S}^+$ : 282.0326. Found: 282.0359.

**(R)-N-(tert-butylsulfinyl)-3-methylbenzamide (1i).**

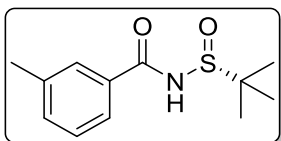

$R_f = 0.3$  (Petroleum ether/EtOAc =3/2). White solid (1.13 g, 47%), mp. 171-172 °C.  $[\alpha]_D^{20} =$

-13.0 (*c* 0.600, CH<sub>2</sub>Cl<sub>2</sub>). <sup>1</sup>H NMR (400 MHz, CDCl<sub>3</sub>): δ 7.95 (br s, 1H), 7.66 (br s, 1H), 7.62 (d, *J* = 7.2 Hz, 1H), 7.39-7.32 (m, 2H), 2.41 (s, 3H), 1.35 (s, 9H). <sup>13</sup>C{<sup>1</sup>H} NMR (100 MHz, CDCl<sub>3</sub>): δ 167.8, 138.8, 133.7, 132.1, 128.7, 128.5, 124.8, 57.7, 22.2, 21.3. HRMS (positive ESI): [M+Na]<sup>+</sup> calcd for C<sub>12</sub>H<sub>17</sub>NNaO<sub>2</sub>S<sup>+</sup>: 262.0872. Found: 262.0870.

**(*R*)-*N*-(*tert*-butylsulfinyl)-3-methoxybenzamide (1j).**

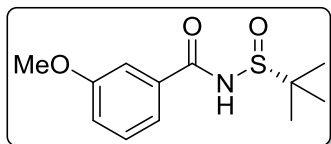

R<sub>f</sub> = 0.3 (Petroleum ether/EtOAc = 3/2). Brown solid (1.23 g, 48%). mp. 98-99 °C. [α]<sub>D</sub><sup>20</sup> = -16.9 (*c* 0.600, CH<sub>2</sub>Cl<sub>2</sub>). <sup>1</sup>H NMR (600 MHz, CDCl<sub>3</sub>): δ 7.83 (br s, 1H), 7.40 (br s, 1H), 7.38-7.35 (m, 2H), 7.12-7.10 (m, 1H), 3.85 (s, 3H), 1.35 (s, 9H). <sup>13</sup>C{<sup>1</sup>H} NMR (150 MHz, CDCl<sub>3</sub>): δ 167.4, 160.0, 133.5, 129.8, 119.7, 119.4, 112.8, 57.7, 55.5, 22.2. HRMS (positive ESI): [M+H]<sup>+</sup> calcd for C<sub>12</sub>H<sub>18</sub>NO<sub>3</sub>S<sup>+</sup>: 256.1002. Found: 256.1030.

**(*R*)-3-bromo-*N*-(*tert*-butylsulfinyl)benzamide (1k).**

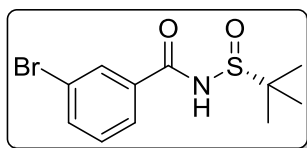

R<sub>f</sub> = 0.3 (Petroleum ether/EtOAc = 3/2). Pale yellow solid (1.32 g, 43%). mp. 134-135 °C. [α]<sub>D</sub><sup>20</sup> = +12.2 (*c* 0.600, CH<sub>2</sub>Cl<sub>2</sub>). <sup>1</sup>H NMR (400 MHz, CDCl<sub>3</sub>): δ 8.74 (br s, 1H), 8.04 (s, 1H), 7.82 (d, *J* = 7.8 Hz, 1H), 7.67 (d, *J* = 8.0 Hz, 1H), 7.33 (t, *J* = 7.9 Hz, 1H), 1.35 (s, 9H). <sup>13</sup>C{<sup>1</sup>H} NMR (100 MHz, CDCl<sub>3</sub>): δ 166.5, 135.8, 133.9, 131.3, 130.2, 126.5, 122.9, 58.2, 22.2. HRMS (positive ESI): [M+Na]<sup>+</sup> calcd for C<sub>11</sub>H<sub>14</sub>BrNNaO<sub>2</sub>S<sup>+</sup>: 325.9821. Found: 325.9864.

**(*R*)-*N*-(*tert*-butylsulfinyl)-3-chlorobenzamide (1l).**

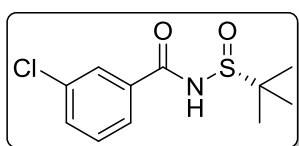

R<sub>f</sub> = 0.3 (Petroleum ether/EtOAc = 3/2). Yellow solid (1.56 g, 60%), mp. 142-143 °C. [α]<sub>D</sub><sup>20</sup> = +7.7 (*c* 0.600, CH<sub>2</sub>Cl<sub>2</sub>). <sup>1</sup>H NMR (400 MHz, CDCl<sub>3</sub>): δ 8.30 (br s, 1H), 7.86 (t, *J* = 1.8 Hz, 1H), 7.75 (d, *J* = 7.8 Hz, 1H), 7.54 (dd, *J* = 0.9, 8.0 Hz, 1H), 7.41 (t, *J* = 7.9 Hz, 1H), 1.35 (s, 9H). <sup>13</sup>C{<sup>1</sup>H} NMR (100 MHz, CDCl<sub>3</sub>): δ 166.5, 135.0, 133.8, 132.9, 130.1, 128.3, 126.0, 58.0, 22.2. HRMS (positive ESI): [M+Na]<sup>+</sup> calcd for C<sub>11</sub>H<sub>14</sub>ClNNaO<sub>2</sub>S<sup>+</sup>: 282.0326. Found:

282.0323.

**(R)-N-(tert-butylsulfinyl)-2-fluorobenzamide (1m).**

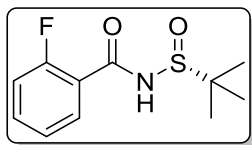

$R_f = 0.3$  (Petroleum ether/EtOAc = 3/2). White solid (0.82 g, 34%), mp. 153-154 °C.  $[\alpha]_D^{20} = -58.6$  ( $c$  0.600,  $\text{CH}_2\text{Cl}_2$ ).  $^1\text{H}$  NMR (400 MHz,  $\text{CDCl}_3$ ):  $\delta$  8.14-8.10 (m, 1H), 7.97 (d,  $J = 14.2$  Hz, 1H), 7.60-7.55 (m, 1H), 7.34-7.30 (m, 1H), 7.18 (dd,  $J = 8.3, 12.2$  Hz, 1H), 1.35 (s, 9H).  $^{13}\text{C}\{^1\text{H}\}$  NMR (150 MHz,  $\text{CDCl}_3$ ):  $\delta$  162.5 (d,  $J_{\text{C-F}} = 257.1$  Hz), 160.0, 135.1 (d,  $J_{\text{C-F}} = 9.4$  Hz), 132.5, 125.3 (d,  $J_{\text{C-F}} = 3.0$  Hz), 119.3 (d,  $J_{\text{C-F}} = 10.5$  Hz), 116.3 (d,  $J_{\text{C-F}} = 24.8$  Hz), 57.0, 22.1.  $^{19}\text{F}$  NMR (565 MHz,  $\text{CDCl}_3$ ):  $\delta$  -111.9. HRMS (positive ESI):  $[\text{M}+\text{Na}]^+$  calcd for  $\text{C}_{11}\text{H}_{14}\text{FNNaO}_2\text{S}^+$ : 266.0621. Found: 266.0619.

**(R)-N-(tert-butylsulfinyl)-2-methylbenzamide (1n).**

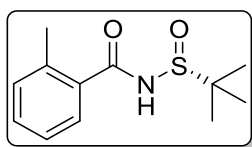

$R_f = 0.3$  (Petroleum ether/EtOAc = 3/2). White solid (1.50 g, 63%), mp. 138-139 °C.  $[\alpha]_D^{20} = -10.8$  ( $c$  0.600,  $\text{CH}_2\text{Cl}_2$ ).  $^1\text{H}$  NMR (400 MHz,  $\text{CDCl}_3$ ):  $\delta$  7.76 (br s, 1H), 7.43 (d,  $J = 7.5$  Hz, 1H), 7.39-7.35 (m, 1H), 7.27-7.22 (m, 2H), 2.45 (s, 3H), 1.32 (s, 9H).  $^{13}\text{C}\{^1\text{H}\}$  NMR (150 MHz,  $\text{CDCl}_3$ ):  $\delta$  167.3, 137.0, 133.5, 131.5, 131.2, 127.1, 125.9, 57.3, 22.2, 20.0. HRMS (positive ESI):  $[\text{M}+\text{Na}]^+$  calcd for  $\text{C}_{12}\text{H}_{17}\text{NNaO}_2\text{S}^+$ : 262.0872. Found: 262.0871.

**(R)-N-(tert-butylsulfinyl)-2-naphthamide (1o).**

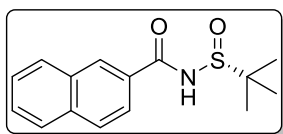

$R_f = 0.3$  (Petroleum ether/EtOAc = 3/2). White solid (1.85 g, 67%), mp. 192-193 °C.  $[\alpha]_D^{20} = +9.6$  ( $c$  0.600,  $\text{CH}_2\text{Cl}_2$ ).  $^1\text{H}$  NMR (600 MHz,  $\text{CDCl}_3$ ):  $\delta$  8.36 (br s, 1H), 7.96-7.92 (m, 2H), 7.89 (d,  $J = 8.0$  Hz, 1H), 7.85 (d,  $J = 8.3$  Hz, 1H), 7.63-7.57 (m, 3H), 1.39 (s, 9H).  $^{13}\text{C}\{^1\text{H}\}$  NMR (150 MHz,  $\text{CDCl}_3$ ):  $\delta$  167.6, 135.4, 132.4, 129.4, 129.2, 128.93, 128.87, 128.6, 127.9, 127.2, 123.6, 57.6, 22.2. HRMS (positive ESI):  $[\text{M}+\text{H}]^+$  calcd for  $\text{C}_{15}\text{H}_{18}\text{NO}_2\text{S}^+$ : 276.1053.

Found: 276.1050.

**(R)-N-(tert-butylsulfinyl)thiophene-2-carboxamide (1p).**

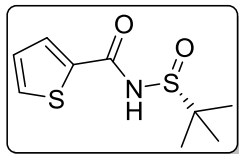

$R_f = 0.3$  (Petroleum ether/EtOAc = 3/2). White solid (1.50 g, 65%), mp. 178-179 °C.  $[\alpha]_D^{20} = -11.3$  ( $c$  0.600,  $\text{CH}_2\text{Cl}_2$ ).  $^1\text{H}$  NMR (400 MHz,  $\text{CDCl}_3$ ):  $\delta$  7.90 (br s, 1H), 7.76 (dd,  $J = 1.1, 3.8$  Hz, 1H), 7.61 (dd,  $J = 1.0, 5.0$  Hz, 1H), 7.13 (dd,  $J = 3.8, 5.0$  Hz, 1H), 1.35 (s, 9H).  $^{13}\text{C}$   $\{^1\text{H}\}$  NMR (150 MHz,  $\text{CDCl}_3$ ):  $\delta$  161.7, 136.5, 132.7, 130.9, 128.1, 57.8, 22.1. HRMS (positive ESI):  $[\text{M}+\text{Na}]^+$  calcd for  $\text{C}_9\text{H}_{13}\text{NNaO}_2\text{S}_2^+$ : 254.0280. Found: 254.0281.

**(R)-N-(tert-butylsulfinyl)cinnamamide (1q).**

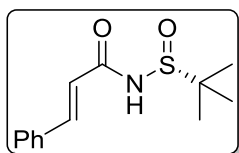

$R_f = 0.3$  (Petroleum ether/EtOAc = 3/2). White solid (1.10 g, 44%), mp. 150-151 °C.  $[\alpha]_D^{20} = +18.0$  ( $c$  0.600,  $\text{CH}_2\text{Cl}_2$ ).  $^1\text{H}$  NMR (400 MHz,  $\text{CDCl}_3$ ):  $\delta$  8.39 (br s 1H), 7.74 (d,  $J = 15.6$  Hz, 1H), 7.55-7.52 (m, 2H), 7.39-7.37 (m, 3H), 6.70 (d,  $J = 15.4$  Hz, 1H), 1.33 (s, 9H).  $^{13}\text{C}$   $\{^1\text{H}\}$  NMR (100 MHz,  $\text{CDCl}_3$ ):  $\delta$  166.8, 145.1, 134.2, 130.6, 128.9, 128.4, 117.9, 57.6, 22.1. HRMS (positive ESI):  $[\text{M}+\text{Na}]^+$  calcd for  $\text{C}_{13}\text{H}_{17}\text{NNaO}_2\text{S}^+$ : 274.0872. Found: 274.0871.

## 2 Optimization of the reaction conditions

Table S1 Screening of the solvent<sup>a</sup>

| entry    | solvent                           | yield (%) <sup>b</sup> | ratio (RS/RR) <sup>c</sup> |
|----------|-----------------------------------|------------------------|----------------------------|
| 1        | <i>n</i> -BuOH                    | trace                  | /                          |
| 2        | $\text{CF}_3\text{CH}_2\text{OH}$ | 27                     | 2.7:1                      |
| 3        | EtOH                              | trace                  | /                          |
| 4        | MeOH                              | trace                  | /                          |
| <b>5</b> | <b>HFIP</b>                       | <b>30</b>              | <b>4.6:1</b>               |

|   |                    |   |   |
|---|--------------------|---|---|
| 6 | <i>t</i> -AmOH     | 0 | / |
| 7 | CH <sub>3</sub> CN | 0 | / |
| 8 | dioxane            | 0 | / |
| 9 | toluene            | 0 | / |

<sup>a</sup>Reaction conditions: **1a** (0.15 mmol), **2a** (0.45 mmol), [Cp\*RhCl<sub>2</sub>]<sub>2</sub> (2.5 mol%), Cu(OAc)<sub>2</sub> (1.0 equiv), solvent (1.0 mL), 80 °C, Ar, 12 h. <sup>b</sup>Isolated yield. <sup>c</sup>The *dr* values were determined from <sup>1</sup>H NMR spectra of crude products.

**Table S2 Screening of the reaction temperature<sup>a</sup>**

| entry    | temp (°C) | yield (%) <sup>b</sup> | ratio ( <i>RS/RR</i> ) <sup>c</sup> |
|----------|-----------|------------------------|-------------------------------------|
| <b>1</b> | <b>80</b> | <b>30</b>              | <b>4.6:1</b>                        |
| 2        | 90        | 26                     | 3.6:1                               |
| 3        | 70        | 21                     | 4.7:1                               |
| 4        | 60        | trace                  | /                                   |

<sup>a</sup>Reaction conditions: **1a** (0.15 mmol), **2a** (0.45 mmol), [Cp\*RhCl<sub>2</sub>]<sub>2</sub> (2.5 mol%), Cu(OAc)<sub>2</sub> (1.0 equiv), HFIP (1.0 mL), Ar, 12 h. <sup>b</sup>Isolated yield. <sup>c</sup>The *dr* values were determined from <sup>1</sup>H NMR spectra of crude products.

**Table S3 Screening of the co-oxidant<sup>a</sup>**

| entry          | co-oxidant (equiv) | yield (%) <sup>b</sup> | ratio ( <i>RS/RR</i> ) <sup>c</sup> |
|----------------|--------------------|------------------------|-------------------------------------|
| 1 <sup>d</sup> | /                  | 28                     | 4.0:1                               |



|                       |                                           |           |              |
|-----------------------|-------------------------------------------|-----------|--------------|
| 2 <sup>e</sup>        | Ag <sub>2</sub> CO <sub>3</sub> (2.0)     | trace     | /            |
| 3 <sup>f</sup>        | AgSbF <sub>6</sub> (0.1)                  | 18        | 4.0:1        |
| 4 <sup>f</sup>        | AgSbF <sub>6</sub> (0.2)                  | 13        | 3.5:1        |
| 5                     | Ag <sub>2</sub> CO <sub>3</sub> (1.0)     | 40        | 5.3:1        |
| 6                     | Ag <sub>2</sub> CO <sub>3</sub> (2.0)     | 50        | 4.7:1        |
| 7                     | AgOAc (2.0)                               | 25        | 2.5:1        |
| 8                     | Ag <sub>2</sub> O (2.0)                   | 40        | 2.2:1        |
| 9                     | AgOTf (2.0)                               | 0         | /            |
| 10                    | AgNO <sub>3</sub> (2.0)                   | 0         | /            |
| <b>11<sup>g</sup></b> | <b>Ag<sub>2</sub>CO<sub>3</sub> (2.0)</b> | <b>57</b> | <b>5.0:1</b> |

<sup>a</sup>Reaction conditions: **1a** (0.15 mmol), **2a** (0.45 mmol), [Cp\*RhCl<sub>2</sub>]<sub>2</sub> (2.5 mol%), Cu(OAc)<sub>2</sub> (1.0 equiv), co-oxidant, HFIP (1.0 mL), 80 °C, Ar, 12 h. <sup>b</sup>Isolated yield.

<sup>c</sup>The *dr* values were determined from <sup>1</sup>H NMR spectra of crude products. <sup>d</sup>Cu(OAc)<sub>2</sub> (2.0 equiv). <sup>e</sup>Without Cu(OAc)<sub>2</sub>. <sup>f</sup>AgSbF<sub>6</sub> was used as the additive. <sup>g</sup>[Cp\*RhCl<sub>2</sub>]<sub>2</sub> (5.0 mol%).

**Table S4 Screening of solvent volume, reaction time and further screening of oxidant<sup>a</sup>**

| <b>1a</b>            | <b>2a</b>   |                        | <b>3aa</b>                          |
|----------------------|-------------|------------------------|-------------------------------------|
| entry                | HFIP (mL)   | yield (%) <sup>b</sup> | ratio ( <i>RS/RR</i> ) <sup>c</sup> |
| 1                    | 1.0         | 57                     | 5.0:1                               |
| 2                    | 0.5         | 63                     | 5.0:1                               |
| 3                    | 0.25        | 67                     | 5.0:1                               |
| <b>4<sup>d</sup></b> | <b>0.25</b> | <b>82</b>              | <b>5.5:1</b>                        |
| 5 <sup>e</sup>       | 0.25        | 80                     | 5.0:1                               |
| 6 <sup>df</sup>      | 0.25        | 11                     | 3.1:1                               |
| 7 <sup>dg</sup>      | 0.25        | 0                      | /                                   |

|          |      |   |   |
|----------|------|---|---|
| $g^{dh}$ | 0.25 | 0 | / |
|----------|------|---|---|

<sup>a</sup>Reaction conditions: **1a** (0.15 mmol), **2a** (0.45 mmol), [Cp\*RhCl<sub>2</sub>]<sub>2</sub> (5.0 mol%), Cu(OAc)<sub>2</sub> (1.0 equiv), Ag<sub>2</sub>CO<sub>3</sub> (2.0 equiv), HFIP (x mL), 80 °C, Ar, 12 h. <sup>b</sup>Isolated yield. <sup>c</sup>The *dr* values were determined from <sup>1</sup>H NMR spectra of crude products. <sup>d</sup>The reaction time was 16 h. <sup>e</sup>The reaction time is 20 h. <sup>f</sup>Under O<sub>2</sub> atmosphere without Ag<sub>2</sub>CO<sub>3</sub>. <sup>g</sup>Under air without Ag<sub>2</sub>CO<sub>3</sub>. <sup>h</sup>TBHP (1.0 equiv) instead of Cu(OAc)<sub>2</sub> and Ag<sub>2</sub>CO<sub>3</sub> was used as the oxidant.

### 3 Mechanistic investigations

#### 3.1 Synthesis of [D<sub>5</sub>]-1a

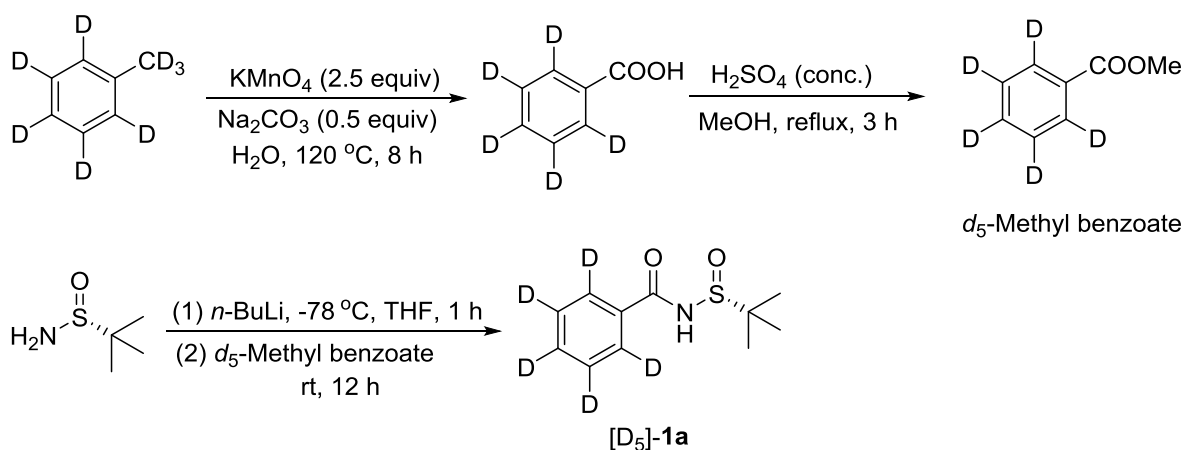

According to the literature report,<sup>[2]</sup> D<sub>8</sub>-toluene (99.9% atom D) (2.5 g, 25.0 mmol), KMnO<sub>4</sub> (9.9 g, 62.5 mmol), Na<sub>2</sub>CO<sub>3</sub> (1.33 g, 12.5 mmol) and water (75.0 mL) were added to a 250 mL round-bottom flask. The reaction system was refluxed at 120 °C for 8 h and then allowed to cool to room temperature. Next, the mixture was filtered through a pad of celite and the obtained filtrate was subjected to acidification with HCl (12.0 M) and then extracted with EtOAc. The organic layer was washed with water and subsequently concentrated *in vacuo*. The crude product was recrystallized from water to give C<sub>6</sub>D<sub>5</sub>COOH as white needles (1.78 g, 56%).

H<sub>2</sub>SO<sub>4</sub> (conc.) (2.0 mL) was added to the solution of C<sub>6</sub>D<sub>5</sub>COOH (1.78 g, 14.0 mmol) dissolved in MeOH (30.0 mL) in a round-bottom flask with a magnetic stir bar and a condenser. The reaction mixture was refluxed until the reaction was completed (monitored by TLC) and followed by cooling to room temperature. Then the solvent was removed under reduced

pressure. The residue was neutralized with saturated NaHCO<sub>3</sub> aqueous solution at 0 °C. Then, the resulted mixture was extracted with EtOAc and the organic layer was combined, dried with anhydrous Na<sub>2</sub>SO<sub>4</sub>, filtered and concentrated *in vacuo* to give *d*<sub>5</sub>-methyl benzoate for the next step without further purification.

At -78 °C, *n*-BuLi (5.6 mL, 14.0 mmol, 3.0 equiv, 2.5 M in THF) was added dropwise to the solution of *R*-(+)-2-methyl-2-propanesulfonamide (557.5 mg, 4.6 mmol, 1.0 equiv) dissolved in dry THF (30.0 mL) under Ar atmosphere. Upon stirring for 1 h, *d*<sub>5</sub>-methyl benzoate (1.98 g, 3.0 equiv) was slowly added and the mixture was stirred for 12 h at room temperature. Then, the reaction was quenched by addition of saturated NH<sub>4</sub>Cl aqueous solution at 0 °C and the organic phase was extracted with EtOAc. The organic layer was combined, washed with brine, dried with anhydrous Na<sub>2</sub>SO<sub>4</sub> and concentrated *in vacuo*. The residue was purified by flash column chromatography using petroleum ether/EtOAc as eluent to give [D<sub>5</sub>]-**1a** (0.48 g, 45%).

**(*R*)-*N*-(*tert*-butylsulfinyl)benzamide-2,3,4,5,6-*d*<sub>5</sub> (D<sub>5</sub>-**1a**):** White solid (0.48 g, 45%). mp. 145-146 °C. [ $\alpha$ ]<sub>D</sub><sup>20</sup> = -19.7 (*c* 0.400, CH<sub>2</sub>Cl<sub>2</sub>). <sup>1</sup>H NMR (400 MHz, CDCl<sub>3</sub>):  $\delta$  7.50 (br s, 1H), 1.35 (s, 9H). <sup>13</sup>C{<sup>1</sup>H} NMR (150 MHz, CDCl<sub>3</sub>):  $\delta$  167.5, 132.5 (t, *J* = 24.7 Hz), 132.0, 128.3 (t, *J* = 24.5 Hz), 127.4, (t, *J* = 24.5 Hz), 57.6, 22.2. HRMS (positive ESI): [M+Na]<sup>+</sup> calcd for C<sub>11</sub>H<sub>10</sub>D<sub>5</sub>NNaO<sub>2</sub>S<sup>+</sup>: 253.1030. Found: 253.1028.

### 3.2 H/D exchange experiments

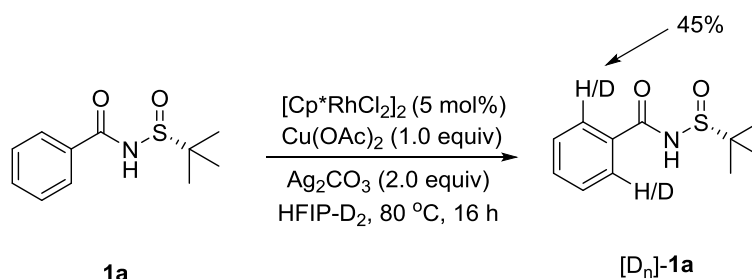



### 3.3 Intermolecular competition KIE.

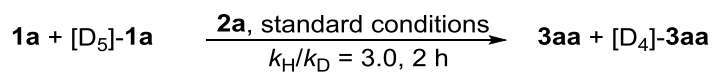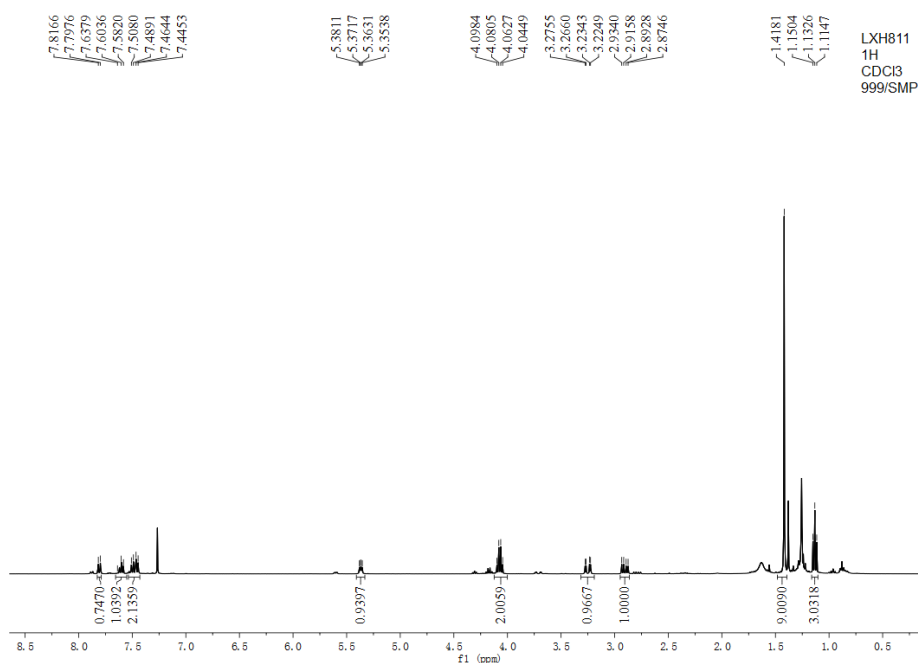

Figure S3  $^1\text{H}$  NMR spectrum of product from intermolecular competition KIE experiment

### 3.4 Parallel experiments

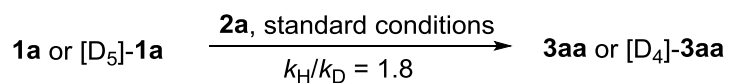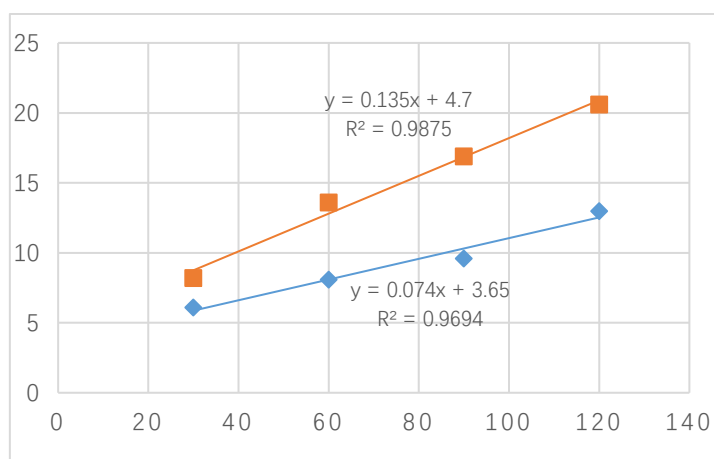

Figure S4 The parallel KIE was calculated as  $k_\text{H}/k_\text{D} = 0.135/0.074 = 1.8$

### 3.5 Competition experiment

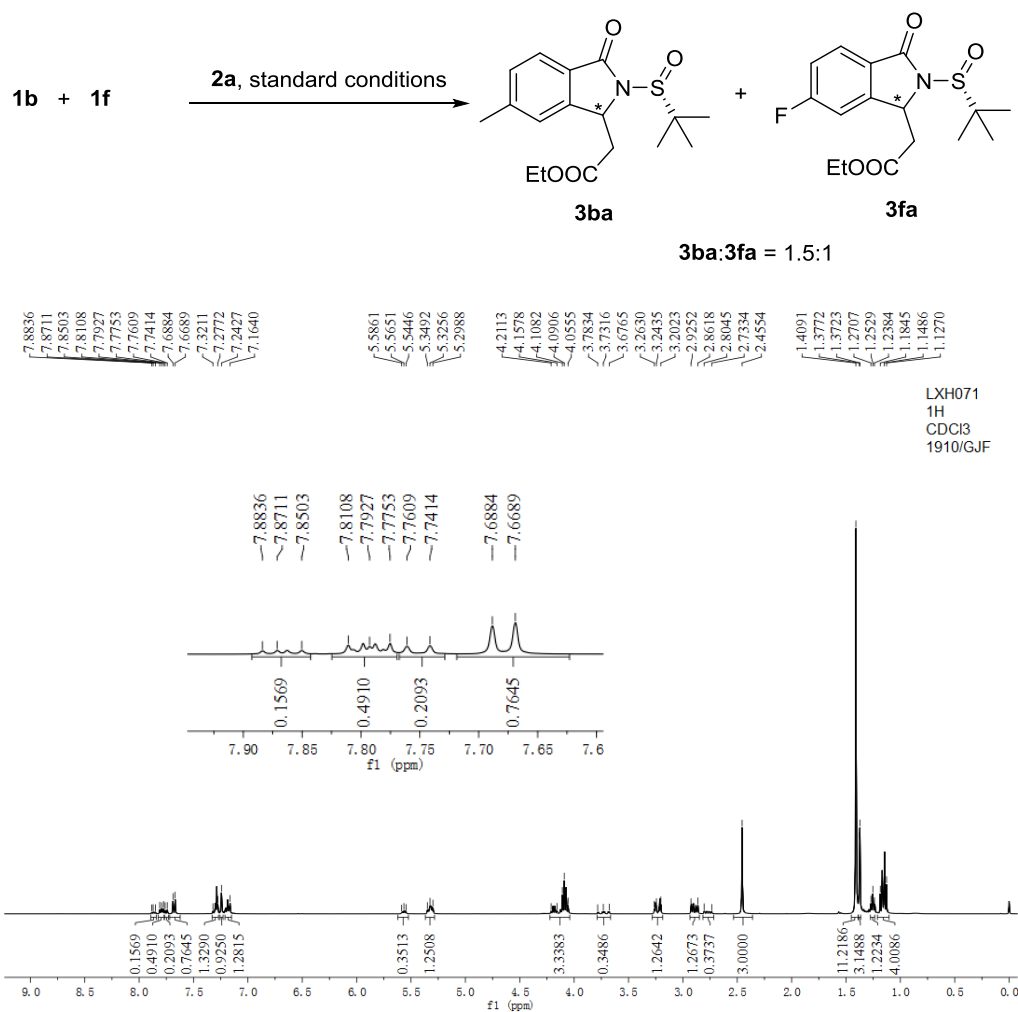

Figure S5  $^1\text{H}$  NMR spectrum of products from the competition experiment

## 4 Removal of *N*-sulfinyl and further transformations

### 4.1 Removal of *N*-sulfinyl

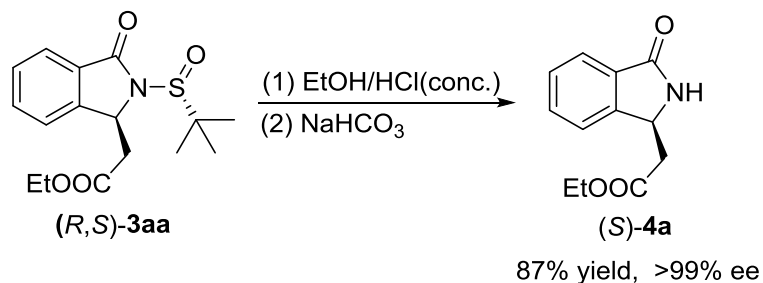

Following the literature report,<sup>[3]</sup> 0.6 mL HCl (conc.) dissolved in EtOH (6.0 mL) was added dropwise to the compound (*R,S*)-**3aa** (39.0 mg, 0.12 mmol) in a round bottom flask at 0 °C. The mixture was stirred at room temperature until the reaction was completed (monitored by TLC). Then, the solvent was removed under reduced pressure and the residue was neutralized

with saturated NaHCO<sub>3</sub> aqueous solution at 0 °C. Next, the mixture was extracted with EtOAc (3×20 mL) and the organic layer was dried with anhydrous Na<sub>2</sub>SO<sub>4</sub>, filtered and evaporated. The residue was purified by preparative TLC on silica gel plates using petroleum ether/EtOAc (3/2) as the eluent to give (*S*)-**4a** as a white solid (23.0 mg, 87%).

**Ethyl (*S*)-2-(3-oxoisindolin-1-yl)acetate ((*S*)-**4a**).** White solid (23.0 mg, 87%). [ $\alpha$ ]<sub>D</sub><sup>20</sup> = -128.8 (*c* 0.24, CH<sub>2</sub>Cl<sub>2</sub>). <sup>1</sup>H NMR (600 MHz, CDCl<sub>3</sub>):  $\delta$  7.79 (d, *J* = 7.6 Hz, 1H), 7.52-7.49 (m, 1H), 7.42 (t, *J* = 7.4 Hz, 1H), 7.35 (d, *J* = 7.7 Hz, 1H), 4.87 (dd, *J* = 3.5, 10.3 Hz, 1H), 4.17 (q, *J* = 7.1 Hz, 2H), 2.93 (dd, *J* = 3.7, 17.0 Hz, 1H), 2.41 (dd, *J* = 10.3, 17.0 Hz, 1H), 1.23 (t, *J* = 7.1 Hz, 3H). <sup>13</sup>C{<sup>1</sup>H} NMR (150 MHz, CDCl<sub>3</sub>):  $\delta$  171.2, 170.1, 145.9, 132.1, 131.8, 128.7, 124.1, 122.3, 61.3, 52.9, 39.6, 14.2. The enantiomeric excess was determined on a Daicel Chiralpak IB column with *n*-hexane/2-propanol (85/15) and flow rate 0.3 mL/min and detected at a UV wavelength of 254 nm. Retention times: 33.2 min (major), 36.6 min (minor), >99% *ee*. HRMS (positive ESI): [M+Na]<sup>+</sup> calcd for C<sub>12</sub>H<sub>13</sub>NNaO<sub>3</sub><sup>+</sup>: 242.0788. Found: 242.0785.

#### 4.2 Synthesis of (*S*)-PD172938

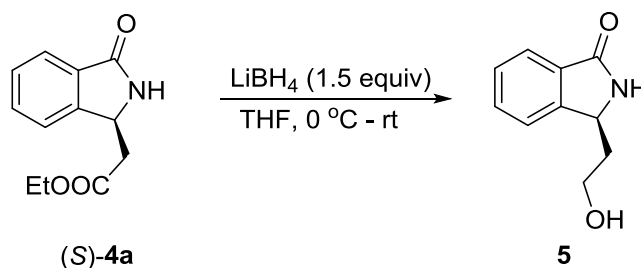

According to the literature method,<sup>[4]</sup> reduction of the ethyl ester (*S*)-**4a** (0.2 mmol, 43.9 mg, 1.0 equiv) by LiBH<sub>4</sub> afforded the compound **5**.

#### (*S*)-3-(2-hydroxyethyl)isoindolin-1-one (**5**).

White solid (28.4 mg, 80%). [ $\alpha$ ]<sub>D</sub><sup>20</sup> = -66.2 (*c* 0.280, CH<sub>2</sub>Cl<sub>2</sub>). Spectroscopic data are in agreement with those reported in the literature.<sup>[4]</sup> The enantiomeric excess was determined on a Daicel Chiralpak IC column with *n*-hexane/2-propanol (60/40) and flow rate 0.8 mL/min and detected at a UV wavelength of 254 nm. Retention times: 14.4 min (minor), 18.5 min (major), >99% *ee*.

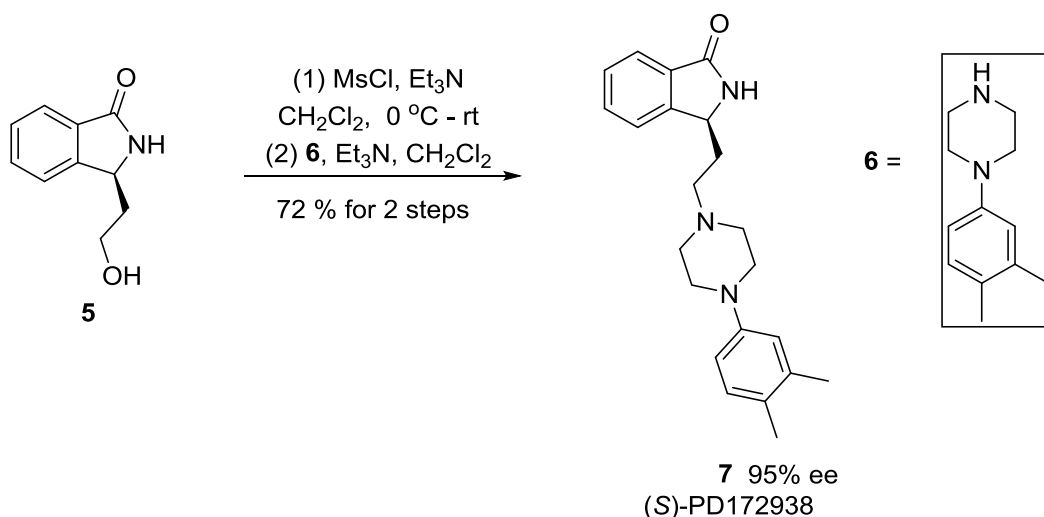

The compound **7** was synthesized from **5** (35.4 mg, 0.2 mmol, 1.0 equiv) according to the literature method.<sup>[4]</sup>

**(S)-3-(2-(4-(3,4-dimethylphenyl)piperazin-1-yl)ethyl)isoindolin-1-one (7)**. White solid (50.3 mg, 72%).  $[\alpha]_D^{20} = -6.0$  (*c* 0.20, CH<sub>2</sub>Cl<sub>2</sub>). <sup>1</sup>H NMR (400 MHz, CDCl<sub>3</sub>):  $\delta$  7.86 (d, *J* = 7.5 Hz, 1H), 7.57 (dt, *J* = 1.0, 7.5 Hz, 1H), 7.53 (br s, 1H), 7.49-7.43 (m, 2H), 7.02 (d, *J* = 8.2 Hz, 1H), 6.75 (d, *J* = 2.2 Hz, 1H), 6.69 (dd, *J* = 2.5, 8.2 Hz, 1H), 4.65 (dd, *J* = 2.8, 9.6 Hz, 1H), 3.24-3.15 (m, 4H), 2.75-2.56 (m, 6H), 2.23 (s, 3H), 2.18 (s, 3H), 2.16-2.15 (m, 1H), 1.82-1.73 (m, 1H). <sup>13</sup>C{<sup>1</sup>H} NMR (100 MHz, CDCl<sub>3</sub>):  $\delta$  170.3, 149.5, 147.5, 137.1, 132.0, 131.7, 130.2, 128.3, 128.2, 123.9, 122.3, 118.3, 114.0, 57.1, 56.5, 53.4, 49.9, 31.4, 20.2, 18.8. The enantiomeric excess was determined on a Daicel Chiralpak AD-H column with *n*-hexane/2-propanol (70/30) and flow rate 0.9 mL/min and detected at a UV wavelength of 254 nm. Retention times: 8.0 min (minor), 9.6 min (major), 95% ee.

#### 4.3 Synthesis of compound 8

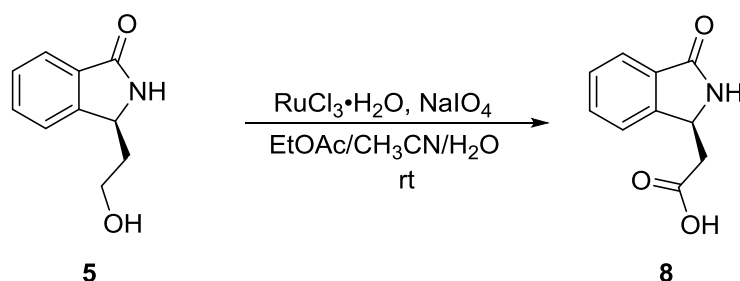

The compound **8** (30.6 mg, 80%) was synthesized by oxidation of the alcohol **5** (35.4 mg, 0.2 mmol, 1.0 equiv) according to the literature method.<sup>[4]</sup>



#### 4.4 Synthesis of compound 10

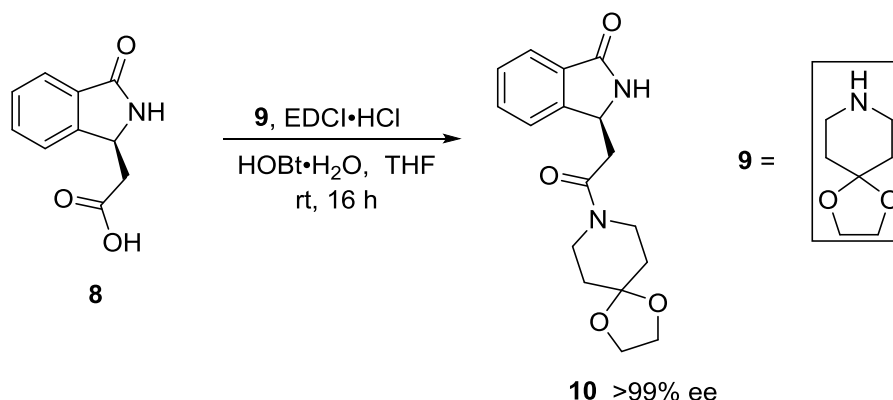

The compound **10** was prepared by the condensation reaction of **8** (38.3 mg, 0.2 mmol, 1.0 equiv) with **9** according to the literature method.<sup>[4]</sup>

#### (S)-3-(2-oxo-2-(1,4-dioxo-8-azaspiro[4.5]decan-8-yl)ethyl)isoindolin-1-one (**10**).

White solid (47.5 mg, 75% yield).  $[\alpha]_{\text{D}}^{20} = -242.9$  (*c* 0.400,  $\text{CH}_2\text{Cl}_2$ ).  $^1\text{H NMR}$  (400 MHz,  $\text{CDCl}_3$ ):  $\delta$  7.86 (d, *J* = 7.5 Hz, 1H), 7.59-7.55 (m, 1H), 7.50-7.44 (m, 2H), 7.12 (br s, 1H), 5.03 (dd, *J* = 2.7, 10.5 Hz, 1H), 4.00-3.96 (m, 4H), 3.80-3.69 (m, 2H), 3.49-3.46 (m, 2H), 3.06 (dd, *J* = 3.2, 16.5 Hz, 1H), 2.42 (dd, *J* = 10.6, 16.5 Hz, 1H), 1.73-1.67 (m, 4H).  $^{13}\text{C}\{^1\text{H}\}$  NMR (100 MHz,  $\text{CDCl}_3$ ):  $\delta$  169.8, 168.3, 146.5, 132.2, 131.8, 128.4, 124.1, 122.3, 106.6, 64.5, 53.4, 43.4, 39.9, 38.9, 35.4, 34.7. The enantiomeric excess was determined on a Daicel Chiralpak AD column with *n*-hexane/2-propanol (75/25) and flow rate 0.5 mL/min and detected at a UV wavelength of 254 nm. Retention times: 50.5 min (major), >99% *ee*.

#### 4.5 Synthesis of compound 11 by *N*-arylation of isoindolinone (**S**)-4b

According to the literature reported method<sup>[5]</sup> and under Ar atmosphere, a 15 mL Schlenk tube was charged with CuI (15.2 mg, 0.05 mmol),  $\text{K}_3\text{PO}_4$  (78.6 mg, 0.23 mmol), 2-iodopyridine (29.0  $\mu\text{L}$ , 0.17 mmol), *N,N*-dimethylethylenediamine (12.5  $\mu\text{L}$ , 0.07 mmol) and (**S**)-**4b** (50.0 mg, 0.15 mmol) dissolved in dioxane (1.6 mL). The reaction mixture was heated at 80 °C for 24 h and then quenched by addition of EtOAc followed by filtration through a celite pad. The solvent was removed under reduced pressure and the residue was purified by preparative TLC on silica gel plates using petroleum ether/EtOAc as the eluent to afford **11**. (Note: (**S**)-**4b** was obtained as described in **4.1**).

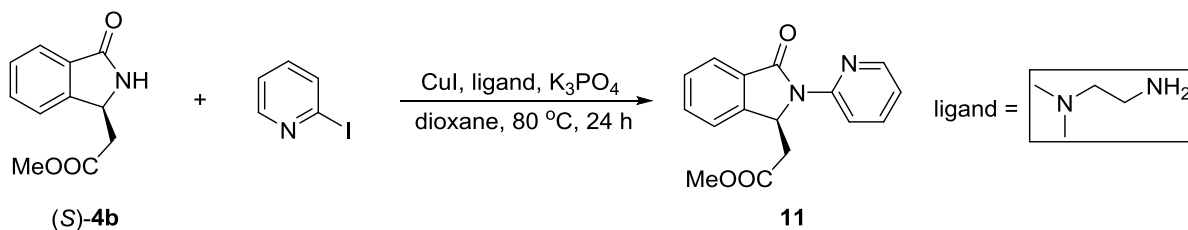

### Methyl (*S*)-2-(3-oxo-2-(pyridin-2-yl)isoindolin-1-yl)acetate (**11**).

White solid (38.0 mg, 90%).  $[\alpha]_{\text{D}}^{20} = +190.5$  ( $c$  0.400,  $\text{CH}_2\text{Cl}_2$ ).  $^1\text{H}$  NMR (400 MHz,  $\text{CDCl}_3$ ):  $\delta$  8.56 (dt,  $J = 0.8, 8.4$  Hz, 1H), 8.43-8.41 (m, 1H), 7.93 (d,  $J = 7.6$  Hz, 1H), 7.79-7.75 (m, 1H), 7.64-7.50 (m, 3H), 7.09-7.06 (m, 1H), 6.00 (dd,  $J = 3.7, 8.2$  Hz, 1H), 3.67 (s, 3H), 3.41 (dd,  $J = 3.7, 16.0$  Hz, 1H), 2.73 (dd,  $J = 8.2, 16.0$  Hz, 1H).  $^{13}\text{C}\{^1\text{H}\}$  NMR (100 MHz,  $\text{CDCl}_3$ ):  $\delta$  171.1, 167.5, 150.9, 147.7, 145.0, 138.0, 132.9, 131.8, 128.7, 124.3, 122.8, 119.6, 115.7, 56.5, 51.8, 38.1. The enantiomeric excess was determined on a Daicel Chiralpak AD column with *n*-hexane/2-propanol (80/20) and flow rate 1.0 mL/min and detected at a UV wavelength of 254 nm. Retention times: 8.2 min (minor), 9.2 min (major), >99% *ee*.

### 5 Crystal data of (*R,R*)-**3aa** and (*R,S*)-**3ab**

Crystals of (*R,R*)-**3aa** (CCDC 1971954) and (*R,S*)-**3ab** (CCDC 2046609) were obtained by recrystallization at ambient temperature from EtOAc/petroleum ether, dichloromethane/petroleum ether, respectively. The data were collected on an Oxford Diffraction Gemini ES8 diffractometer with graphite-monochromated Cu  $\text{K}\alpha$  radiation ( $\lambda = 1.54184\text{ \AA}$ ) for compounds (*R,R*)-**3aa** and (*R,S*)-**3ab**.

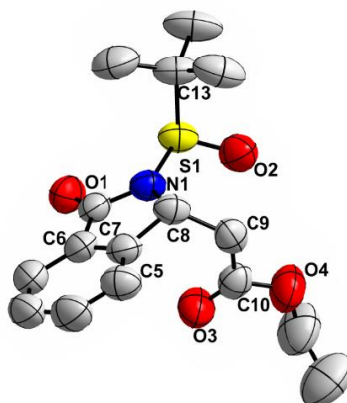

**Figure S6** Molecular structure of (*R,R*)-**3aa** with thermal ellipsoids drawn at the 50%

probability level (Hydrogen atoms are omitted for clarity; one of the two independent molecules shown).

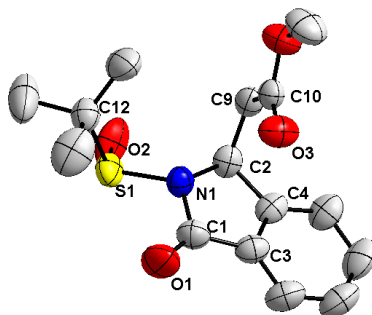

**Figure S7** Molecular structure of (*R,S*)-**3ab** with thermal ellipsoids drawn at the 50% probability level (Hydrogen atoms are omitted for clarity).

**Table S5. Summary of crystal structure determination for (*R,R*)-**3aa** and (*R,S*)-**3ab****

|                                       | <i>(R,R)</i> - <b>3aa</b>                         | <i>(R,S)</i> - <b>3ab</b>                         |
|---------------------------------------|---------------------------------------------------|---------------------------------------------------|
| Empirical formula                     | C <sub>16</sub> H <sub>21</sub> NO <sub>4</sub> S | C <sub>15</sub> H <sub>19</sub> NO <sub>4</sub> S |
| Formula weight                        | 323.40                                            | 309.37                                            |
| Temperature/K                         | 293(2)                                            | 293(2)                                            |
| Crystal system                        | monoclinic                                        | orthorhombic                                      |
| Space group                           | P2 <sub>1</sub>                                   | P2 <sub>1</sub> 2 <sub>1</sub> 2 <sub>1</sub>     |
| <i>a</i> /Å                           | 9.4481(4)                                         | 8.6665(5)                                         |
| <i>b</i> /Å                           | 10.3898(5)                                        | 9.0914(5)                                         |
| <i>c</i> /Å                           | 17.9970(9)                                        | 20.0289(10)                                       |
| $\alpha$ /°                           | 90                                                | 90                                                |
| $\beta$ /°                            | 96.944(4)                                         | 90                                                |
| $\gamma$ /°                           | 90                                                | 90                                                |
| Volume/Å <sup>3</sup>                 | 1753.69(14)                                       | 1578.09(15)                                       |
| <i>Z</i>                              | 4                                                 | 4                                                 |
| $\rho_{\text{calc}}$ /cm <sup>3</sup> | 1.225                                             | 1.302                                             |
| $\mu$ /mm <sup>-1</sup>               | 1.782                                             | 1.957                                             |
| <i>F</i> (000)                        | 688.0                                             | 656.0                                             |
| Crystal size/mm <sup>3</sup>          | 0.19 × 0.16 × 0.14                                | 0.16 × 0.14 × 0.1                                 |

| Radiation                                        | CuK $\alpha$ ( $\lambda = 1.54184$ )                                         | CuK $\alpha$ ( $\lambda = 1.54184$ )                                        |
|--------------------------------------------------|------------------------------------------------------------------------------|-----------------------------------------------------------------------------|
| 2 $\Theta$ range for data collection/ $^{\circ}$ | 9.43 to 134.158                                                              | 8.83 to 134.094                                                             |
| Index ranges                                     | -11 $\leq$ h $\leq$ 10,<br>-11 $\leq$ k $\leq$ 12,<br>-20 $\leq$ l $\leq$ 21 | -10 $\leq$ h $\leq$ 10,<br>-9 $\leq$ k $\leq$ 10,<br>-23 $\leq$ l $\leq$ 20 |
| Reflections collected                            | 14681                                                                        | 5764                                                                        |
| Independent reflections                          | 5731 [R <sub>int</sub> = 0.0322,<br>R <sub>sigma</sub> = 0.0362]             | 2812 [R <sub>int</sub> = 0.0316,<br>R <sub>sigma</sub> = 0.0434]            |
| Data/restraints/parameters                       | 5731/3/413                                                                   | 2812/49/207                                                                 |
| Goodness-of-fit on F <sup>2</sup>                | 1.071                                                                        | 1.062                                                                       |
| Final R indexes [ $I \geq 2\sigma(I)$ ]          | R <sub>1</sub> = 0.0477,<br>wR <sub>2</sub> = 0.1380                         | R <sub>1</sub> = 0.0447,<br>wR <sub>2</sub> = 0.1087                        |
| Final R indexes [all data]                       | R <sub>1</sub> = 0.0629,<br>wR <sub>2</sub> = 0.1557                         | R <sub>1</sub> = 0.0515,<br>wR <sub>2</sub> = 0.1158                        |
| peak/hole [e $\text{\AA}^{-3}$ ]                 | 0.27/-0.23                                                                   | 0.18/-0.24                                                                  |
| CCDC number                                      | 1971954                                                                      | 2046609                                                                     |

**Table S6. Selected bond lengths ( $\text{\AA}$ ) and angles ( $^{\circ}$ ) for (*R,R*)-3aa and (*R,S*)-3ab**

| <b>(<i>R,R</i>)-3aa</b> |           | <b>(<i>R,S</i>)-3ab</b> |           |
|-------------------------|-----------|-------------------------|-----------|
| C5-C8                   | 1.509 (6) | C1-C3                   | 1.473 (6) |
| C6-C7                   | 1.476 (7) | C1-O1                   | 1.213 (5) |
| C7-N1                   | 1.387 (6) | C1-N1                   | 1.406 (5) |
| C7-O1                   | 1.205 (7) | C2-C4                   | 1.505 (5) |
| C8-N1                   | 1.487 (6) | C2-C9                   | 1.514 (6) |
| N1-S1                   | 1.704 (4) | N1-S1                   | 1.720 (3) |
| C5-C6-C7                | 109.5 (4) | C1-N1-C2                | 111.7 (3) |
| N1-C7-C6                | 105.5 (4) | S1-N1-C1                | 116.9 (3) |
| O1-C7-C6                | 128.9 (5) | N1-C2-C4                | 101.9 (3) |
| O1-C7-N1                | 125.6 (5) | C2-C9-C10               | 115.1 (3) |

|           |           |          |             |
|-----------|-----------|----------|-------------|
| C8-N1-S1  | 128.0 (3) | C1-C3-C4 | 109.3 (3)   |
| C7-N1-C8  | 113.4 (4) | N1-C1-C3 | 106.2 (3)   |
| N1-S1-C13 | 102.7 (2) | O2-S1-N1 | 104.66 (18) |
| O2-S1-N1  | 107.5(2)  | C3-C4-C2 | 110.8 (3)   |

## 6 References

- [1] (a) F. Xue, F. Wang, J. Liu, J. Di, Q. Liao, H. Lu, M. Zhu, L. He, H. He, D. Zhang, H. Song, X.-Y. Liu and Y. Qin, *Angew. Chem. Int. Ed.*, 2018, **57**, 6667; (b) Z.-Y. Xu, Y. Luo, D.-W. Zhang, H. Wang, X.-W. Sun and Z.-T. Li, *Green Chem.*, 2020, **22**, 136.
- [2] Q.-L. Yang, X.-Y. Wang, T.-L. Wang, X. Yang, D. Liu, X. Tong, X.-Y. Wu and T.-S. Mei, *Org. Lett.*, 2019, **21**, 2645.
- [3] M. F. Jacobsen and T. Skrydstrup, *J. Org. Chem.*, 2003, **68**, 7112.
- [4] S. K. Ray, M. M. Sadhu, R. G. Biswas, R. A. Unhale and V. K. Singh, *Org. Lett.*, 2019, **21**, 417.
- [5] A. Di Mola, M. Tiffner, F. Scorzelli, L. Palombi, R. Filosa, P. De Caprariis, M. Waser and A. Massa, *Beilstein J. Org. Chem.*, 2015, **11**, 2591.

## 7 NMR and HPLC spectra

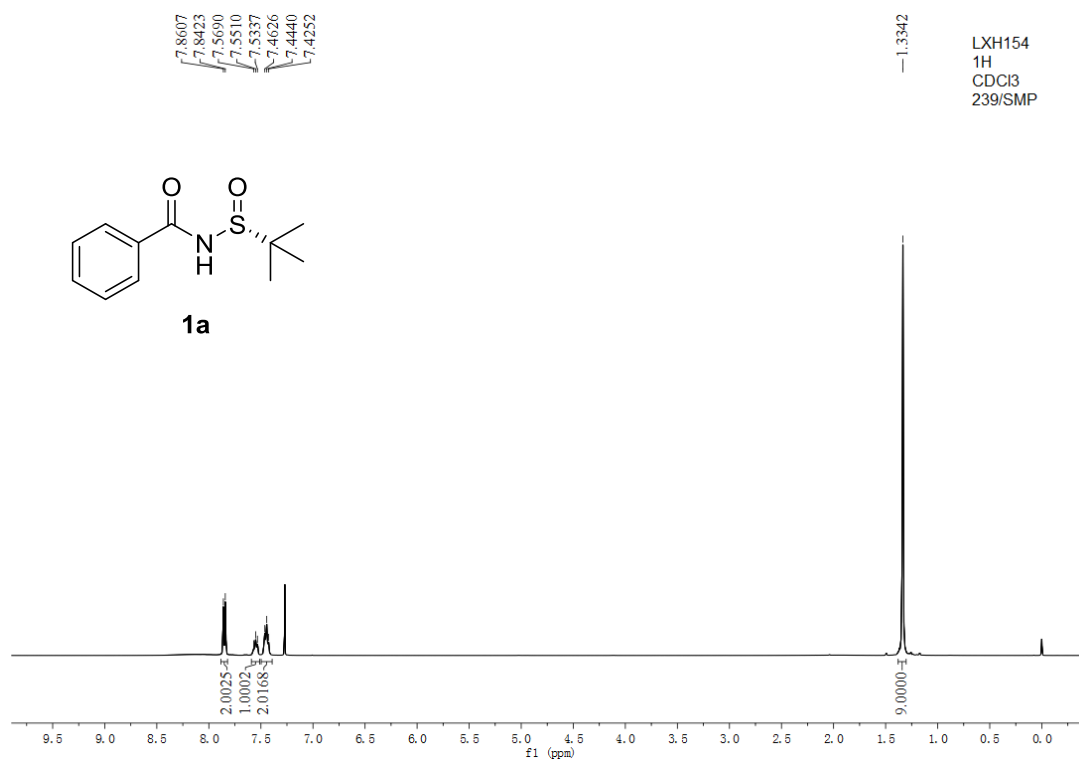

<sup>1</sup>H NMR (400 MHz, CDCl<sub>3</sub>) of **1a**

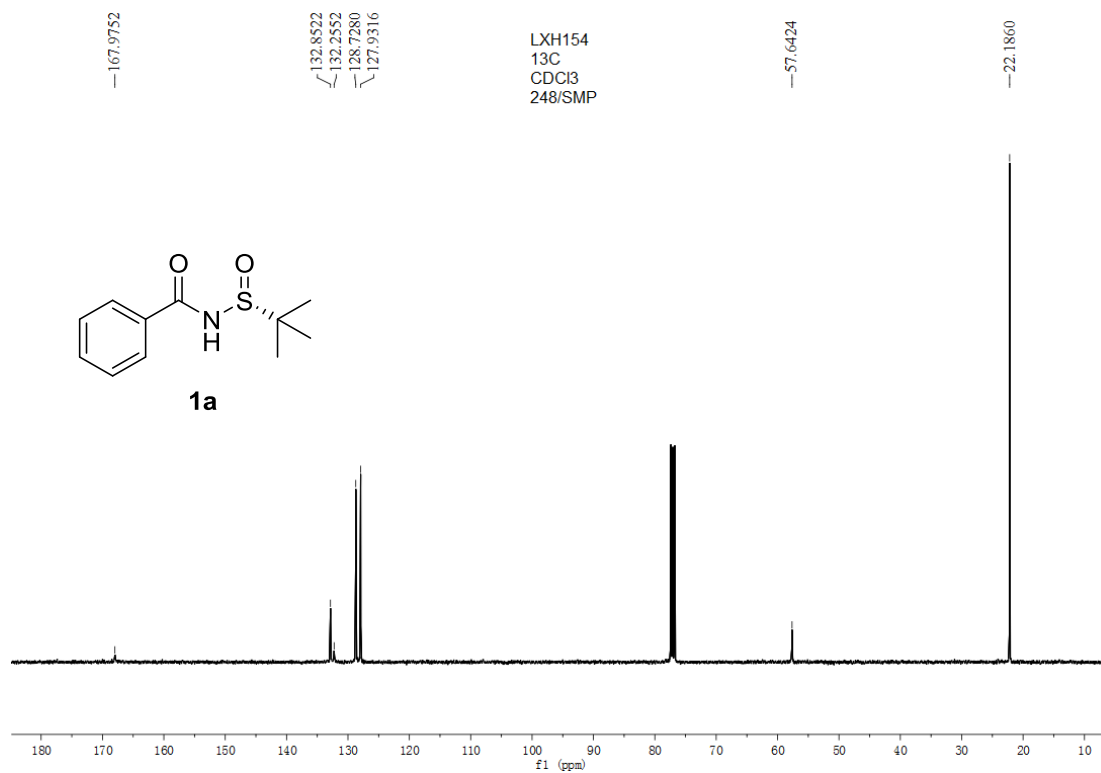

<sup>13</sup>C{<sup>1</sup>H} NMR (100 MHz, CDCl<sub>3</sub>) of **1a**

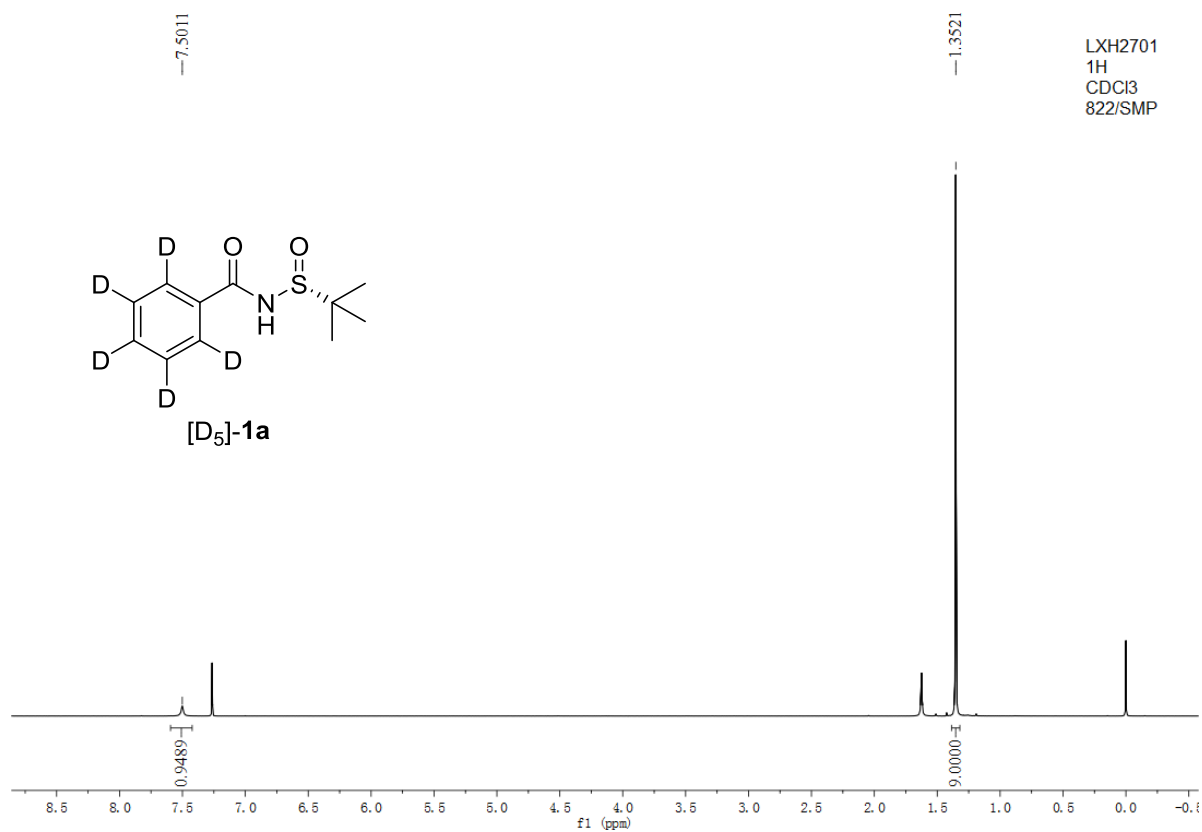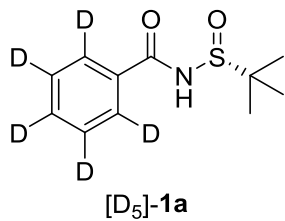

<sup>1</sup>H NMR (400 MHz, CDCl<sub>3</sub>) of [D<sub>5</sub>]-1a

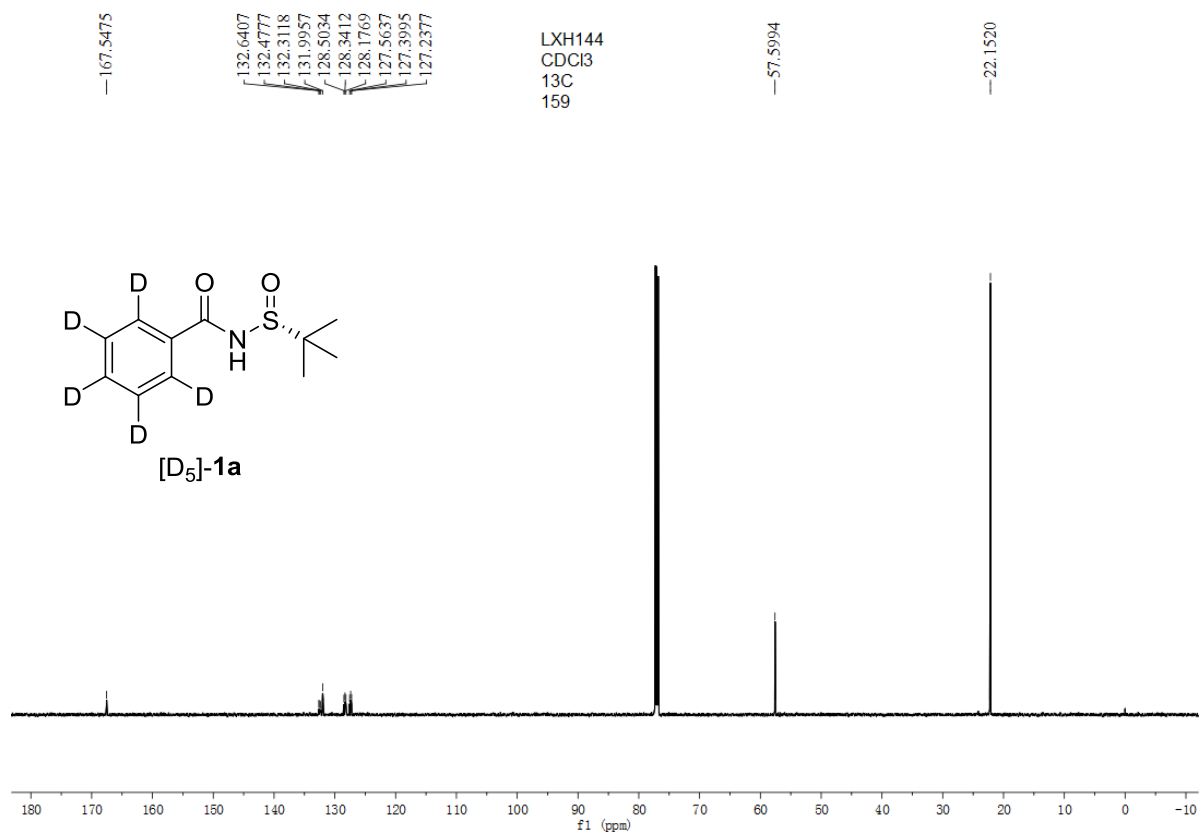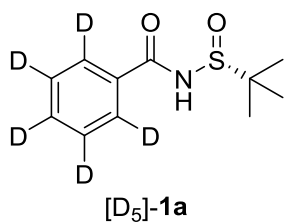

<sup>13</sup>C{<sup>1</sup>H} NMR (150 MHz, CDCl<sub>3</sub>) of [D<sub>5</sub>]-1a

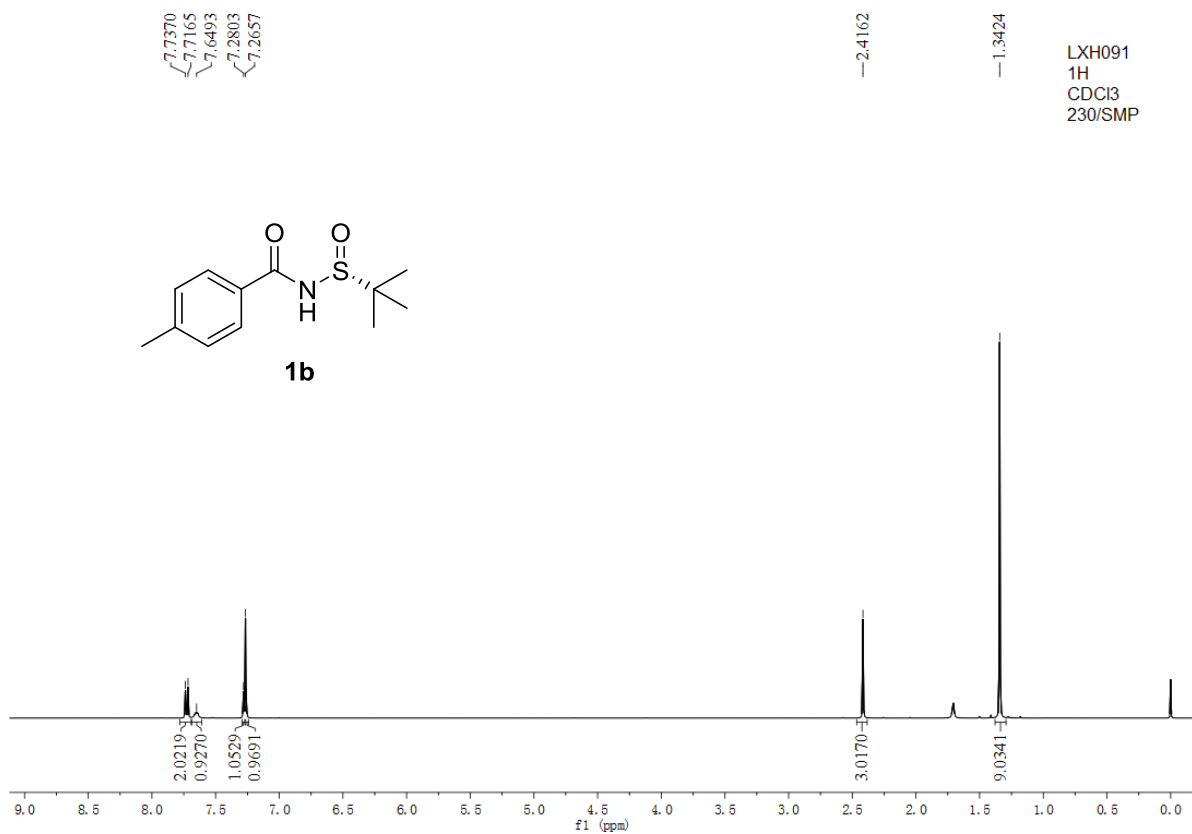

$^1\text{H}$  NMR (400 MHz,  $\text{CDCl}_3$ ) of **1b**

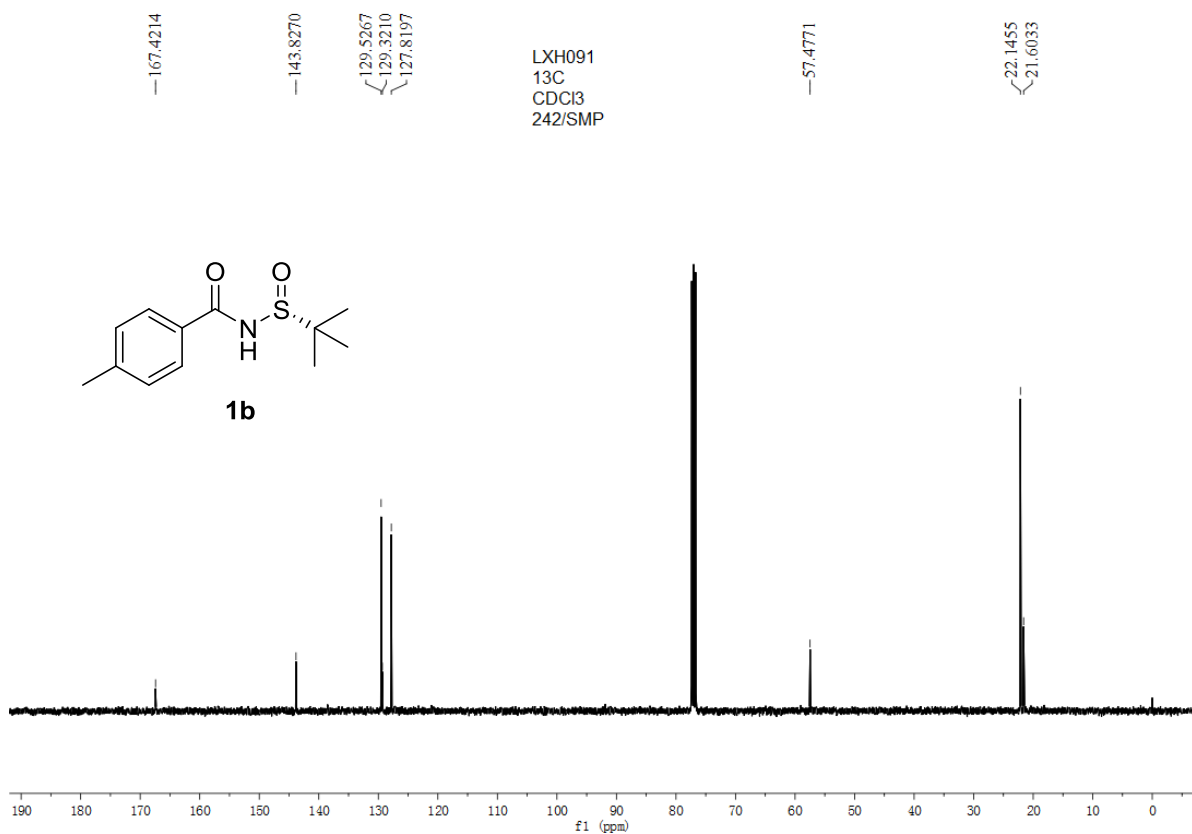

$^{13}\text{C}\{^1\text{H}\}$  NMR (100 MHz,  $\text{CDCl}_3$ ) of **1b**



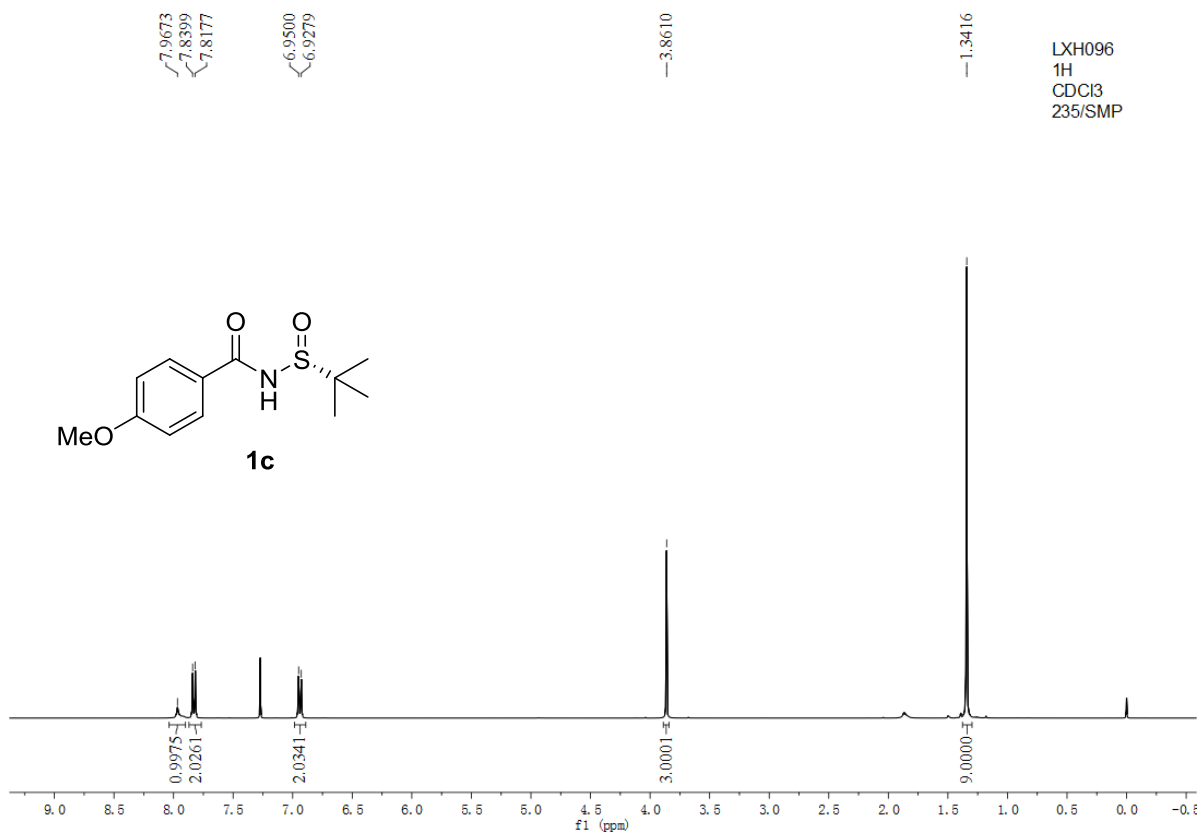

<sup>1</sup>H NMR (400 MHz, CDCl<sub>3</sub>) of **1c**

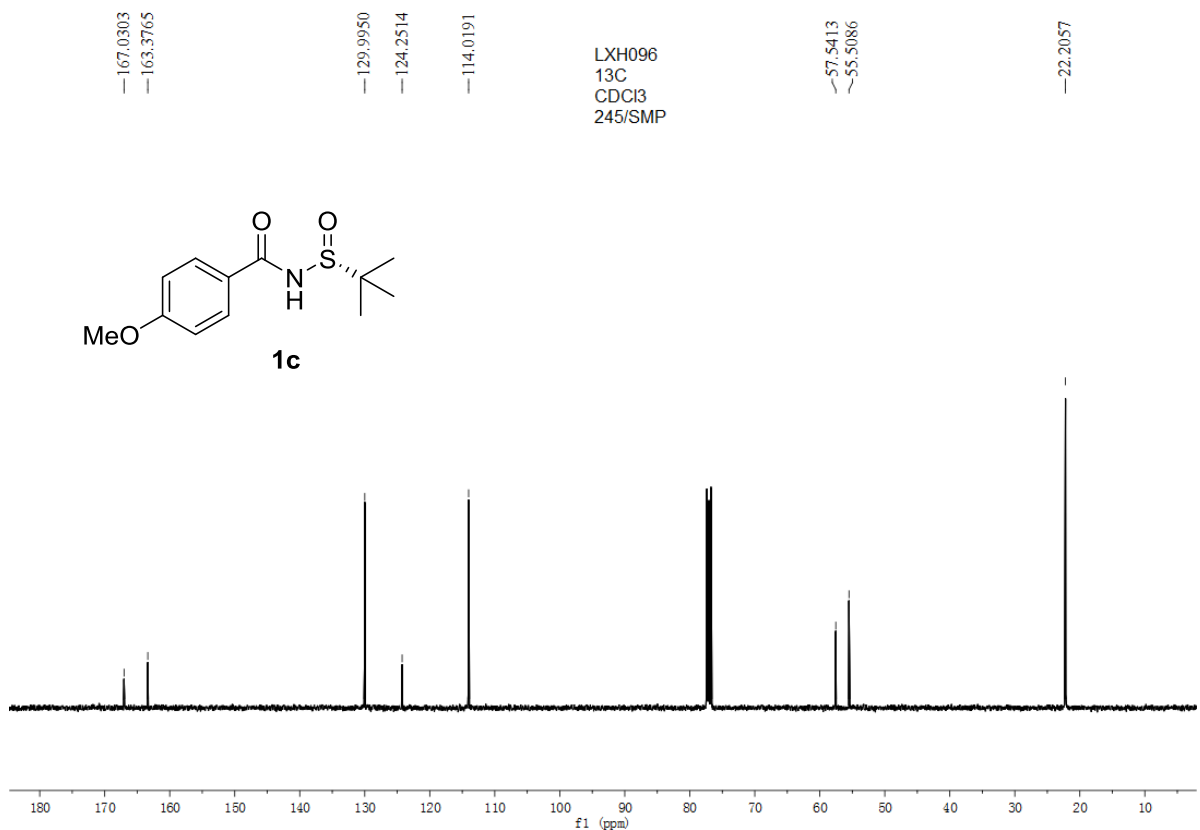

<sup>13</sup>C {<sup>1</sup>H} NMR (100 MHz, CDCl<sub>3</sub>) of **1c**

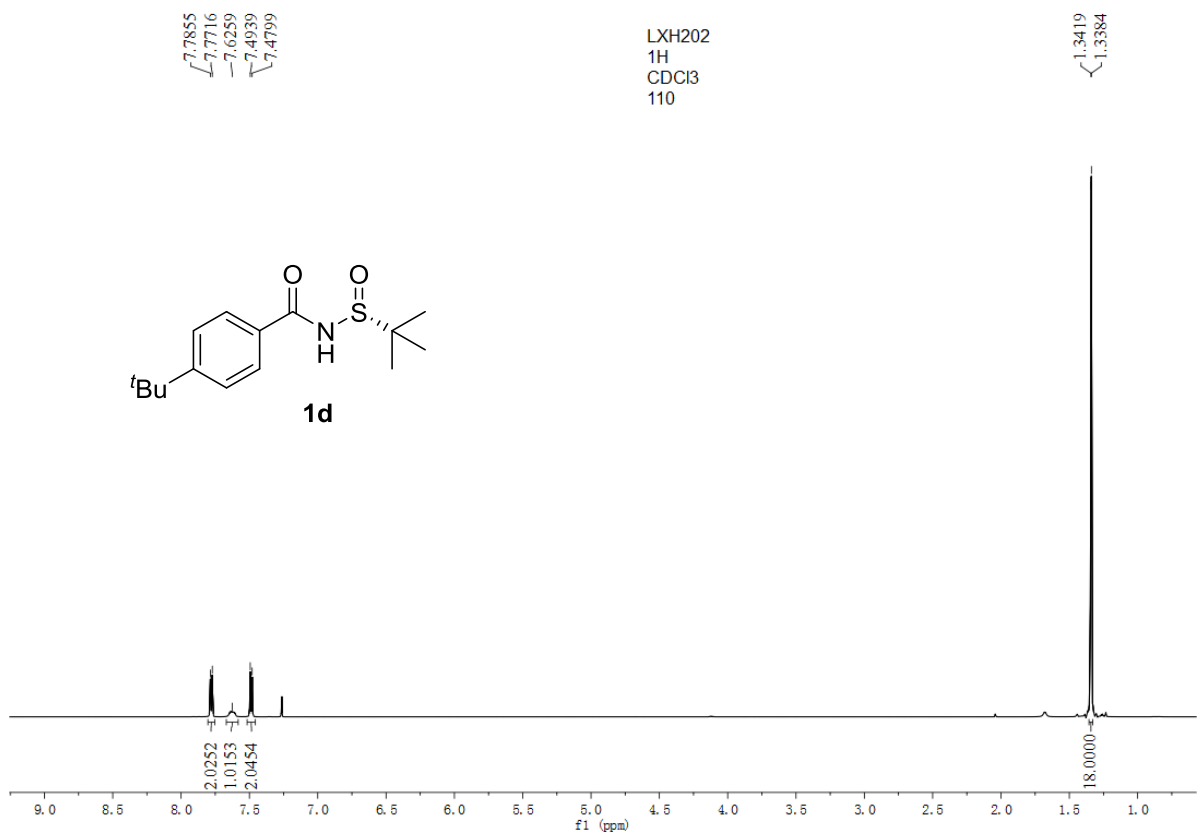

$^1\text{H}$  NMR (600 MHz,  $\text{CDCl}_3$ ) of **1d**

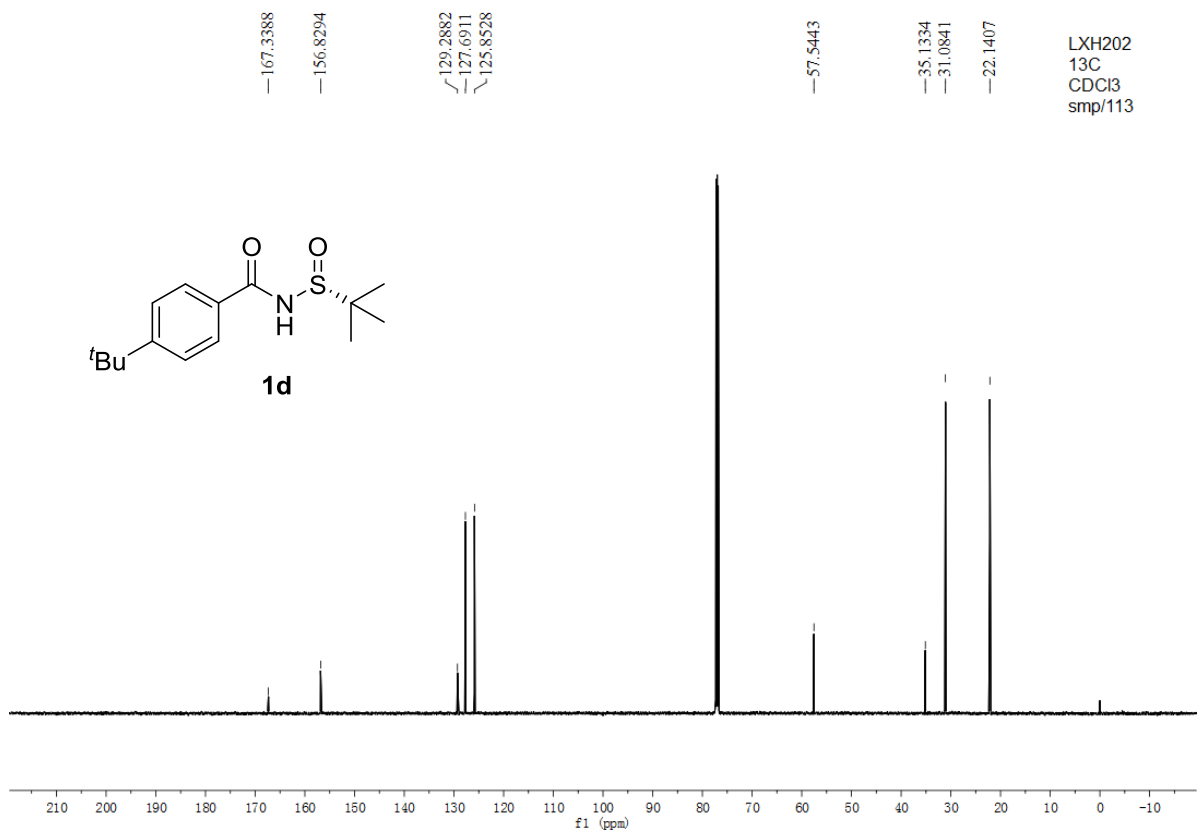

$^{13}\text{C}\{^1\text{H}\}$  NMR (150 MHz,  $\text{CDCl}_3$ ) of **1d**

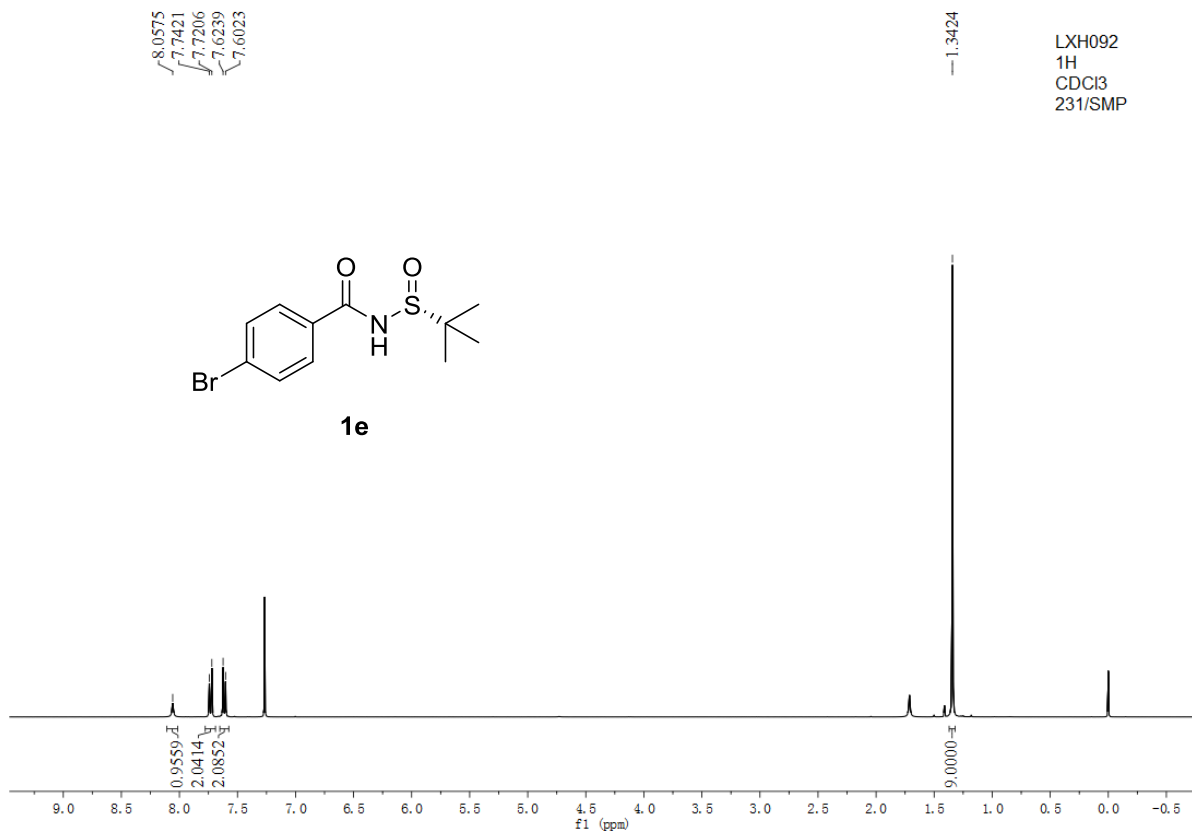

$^1\text{H}$  NMR (400 MHz,  $\text{CDCl}_3$ ) of **1e**

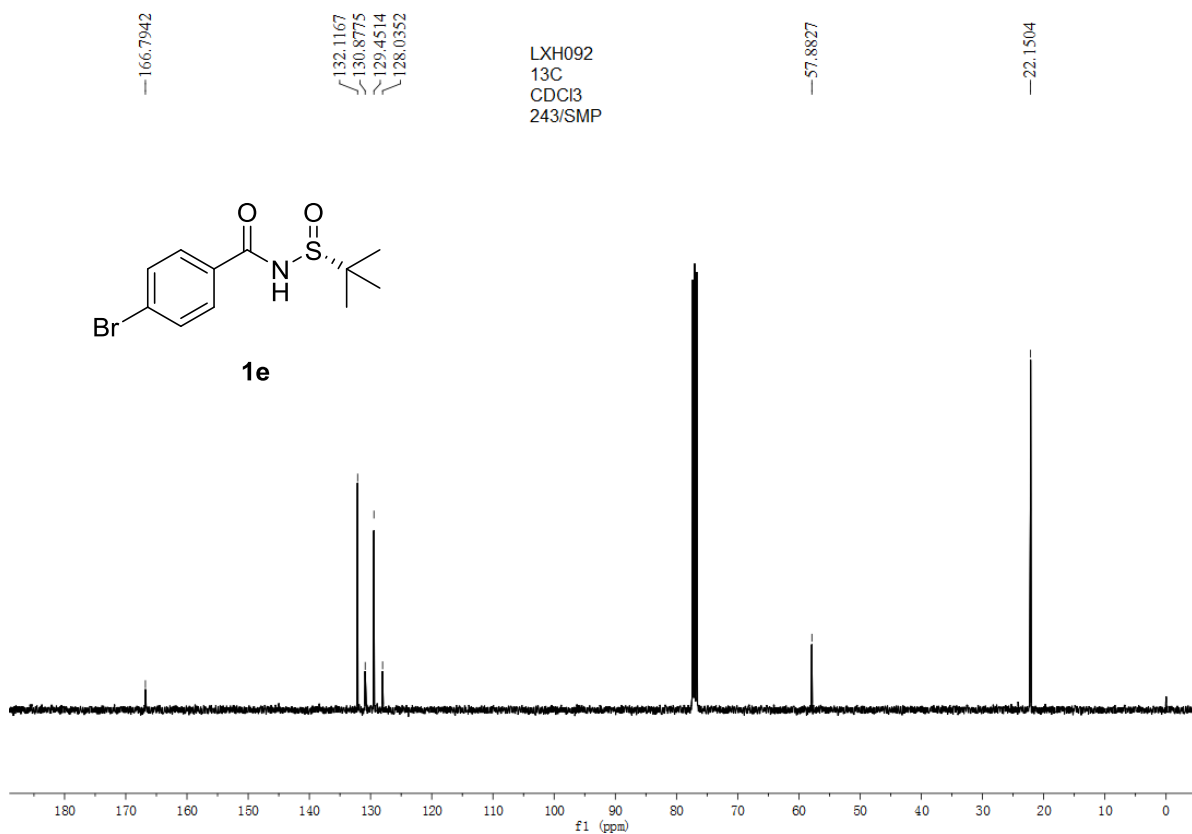

$^{13}\text{C}\{^1\text{H}\}$  NMR (100 MHz,  $\text{CDCl}_3$ ) of **1e**

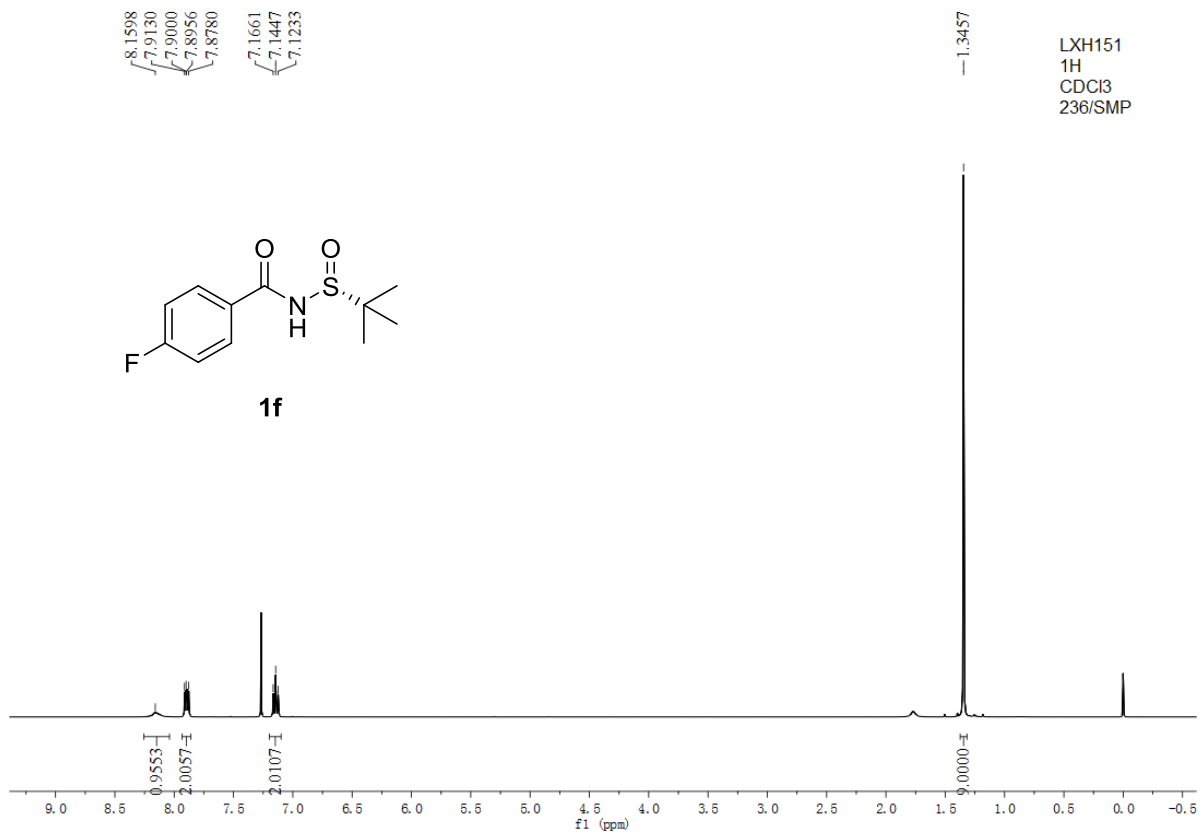

<sup>1</sup>H NMR (400 MHz, CDCl<sub>3</sub>) of **1f**

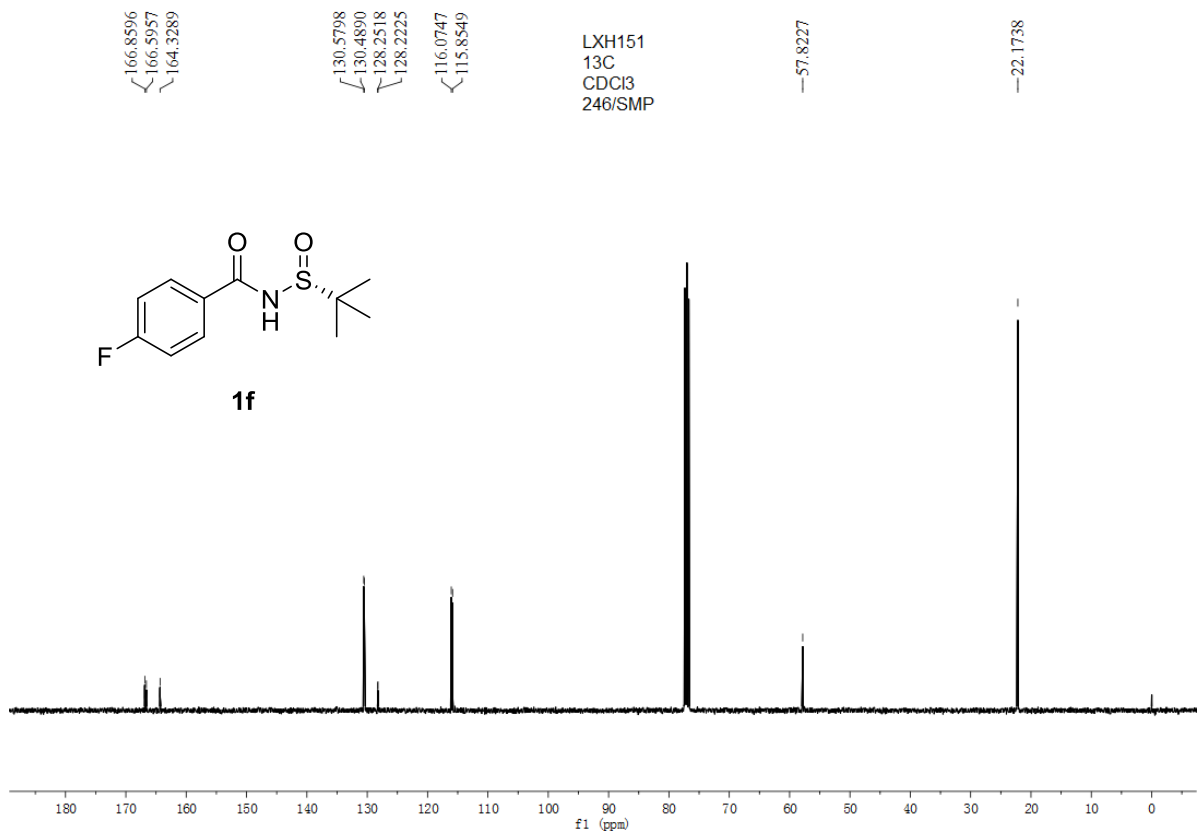

<sup>13</sup>C {<sup>1</sup>H} NMR (100 MHz, CDCl<sub>3</sub>) of **1f**

-105.1780

LXH-151  
19F  
CDCl3  
smp/170

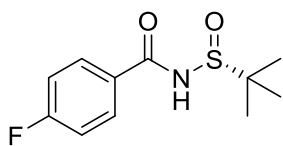

**1f**

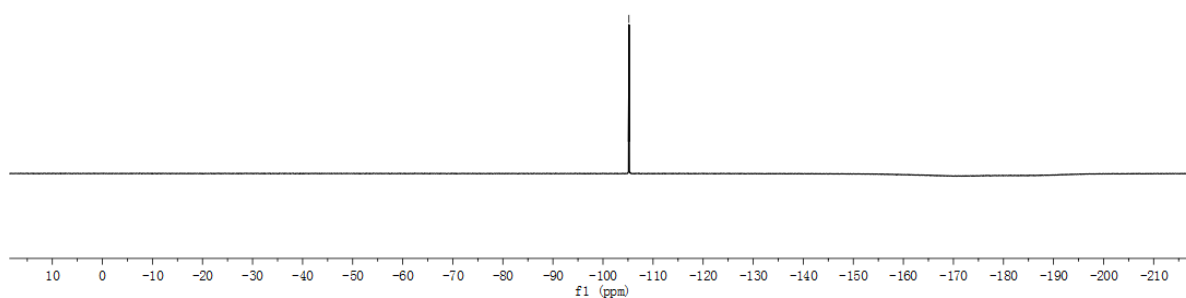

-9.0646

-8.0100  
-7.9950  
-7.6454

-1.3222

LXH041  
1H  
CDCl3  
1897/GJF

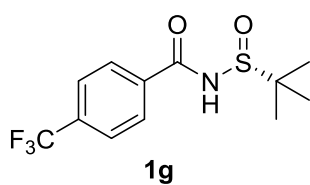

**1g**

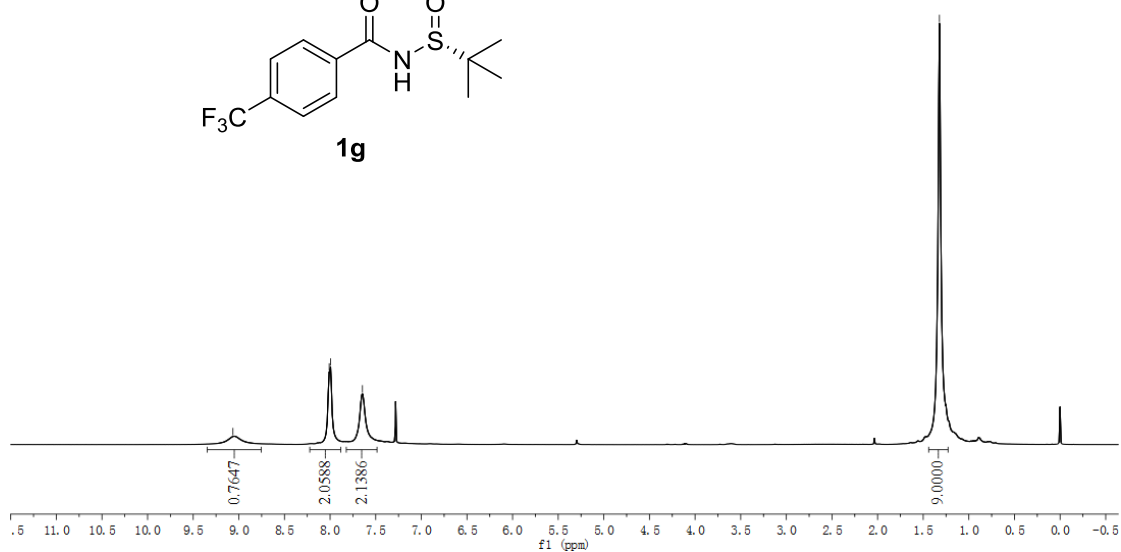

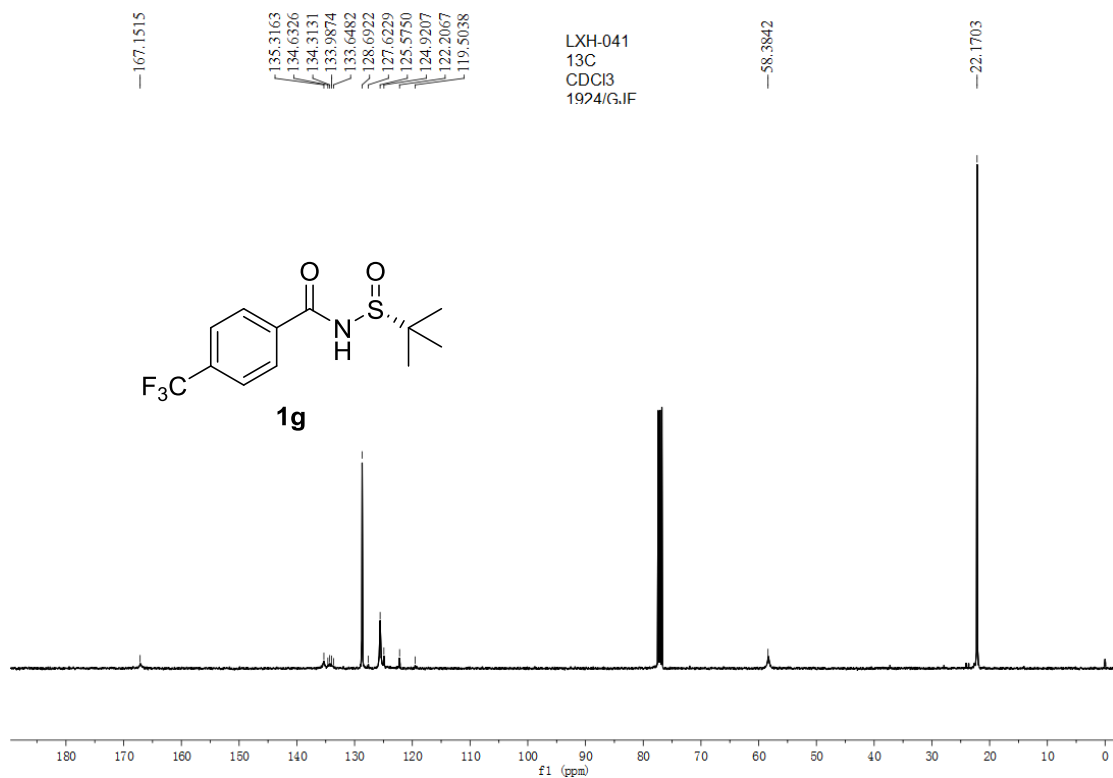

$^{13}\text{C}\{^1\text{H}\}$  NMR (100 MHz,  $\text{CDCl}_3$ ) of **1g**

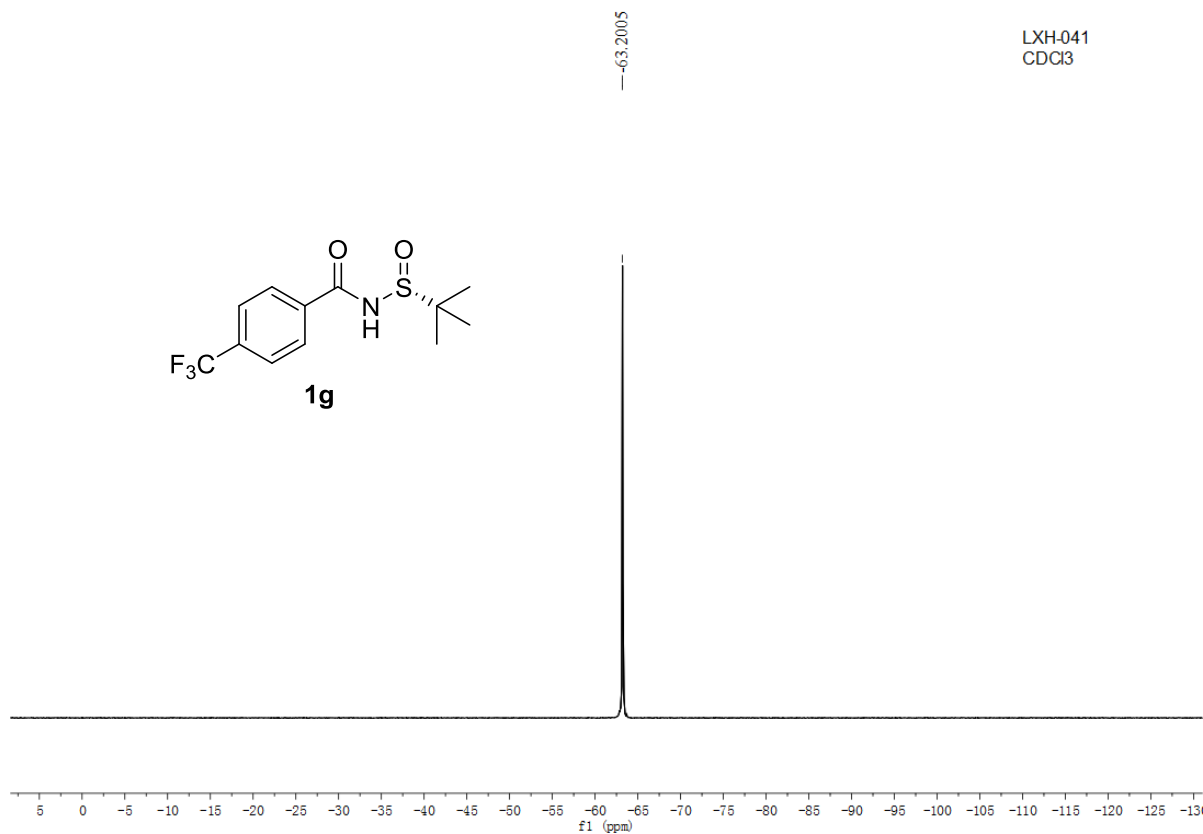

$^{19}\text{F}$  NMR (376 MHz,  $\text{CDCl}_3$ ) of **1g**

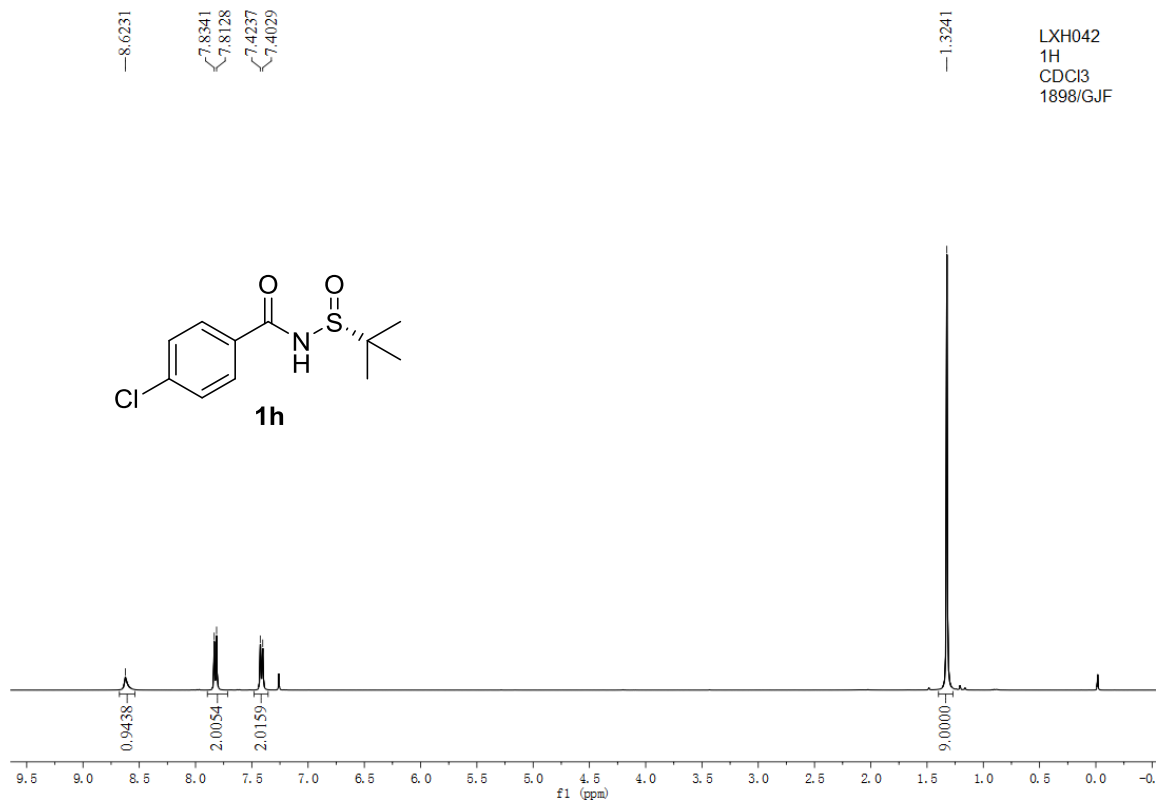

$^1\text{H}$  NMR (400 MHz,  $\text{CDCl}_3$ ) of **1h**

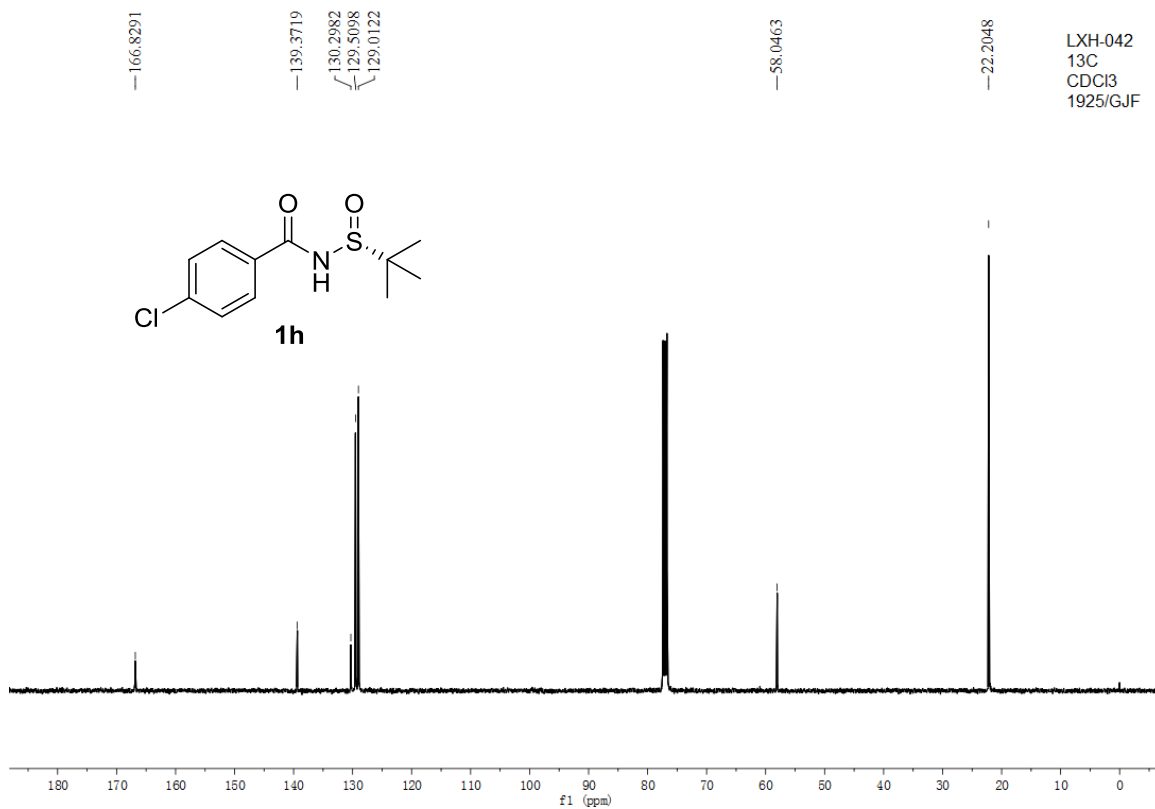

$^{13}\text{C}\{^1\text{H}\}$  NMR (100 MHz,  $\text{CDCl}_3$ ) of **1h**

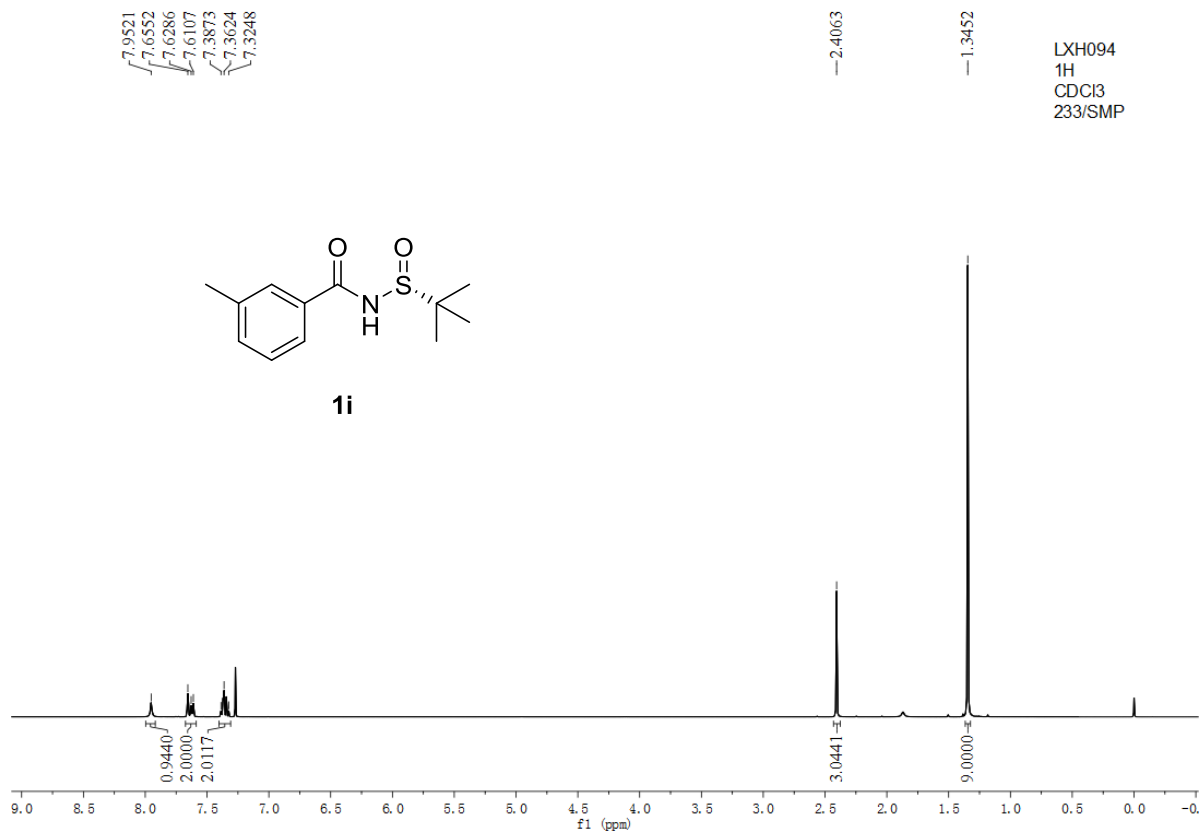

$^1\text{H}$  NMR (400 MHz,  $\text{CDCl}_3$ ) of **1i**

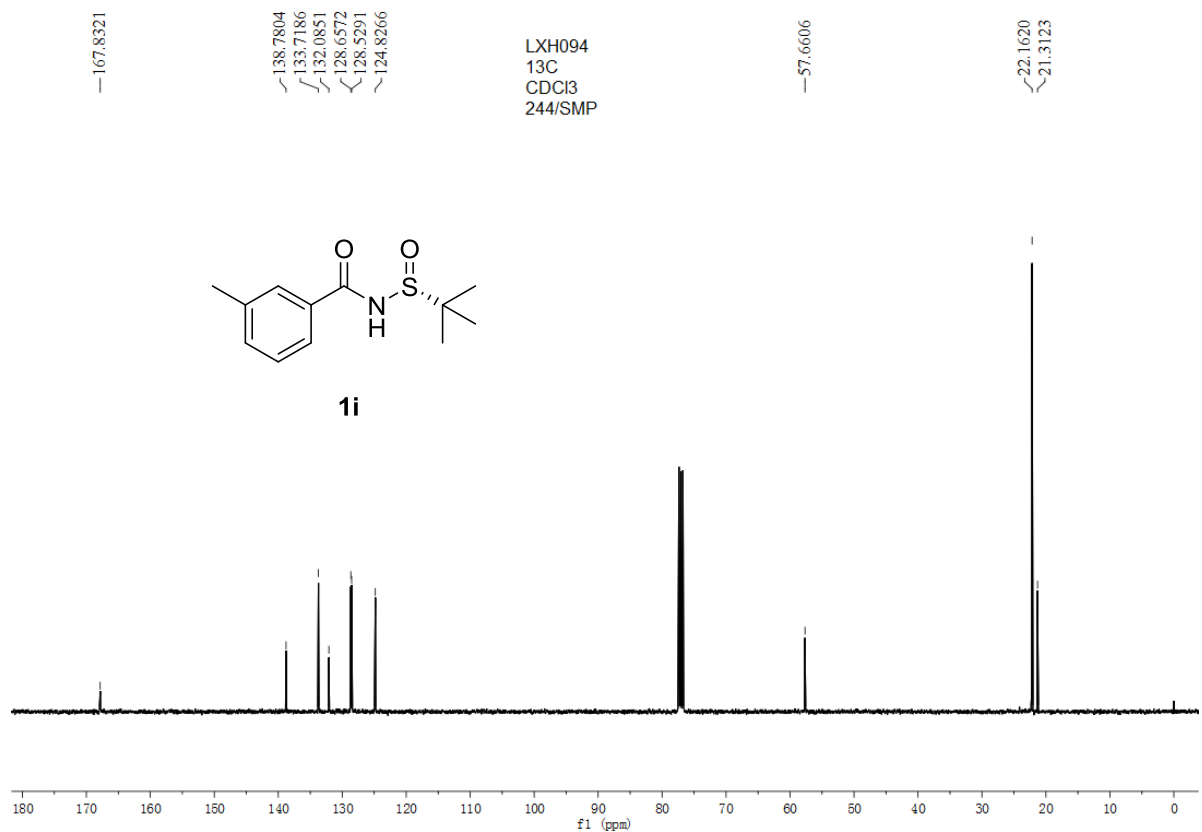

$^{13}\text{C}\{^1\text{H}\}$  NMR (100 MHz,  $\text{CDCl}_3$ ) of **1i**



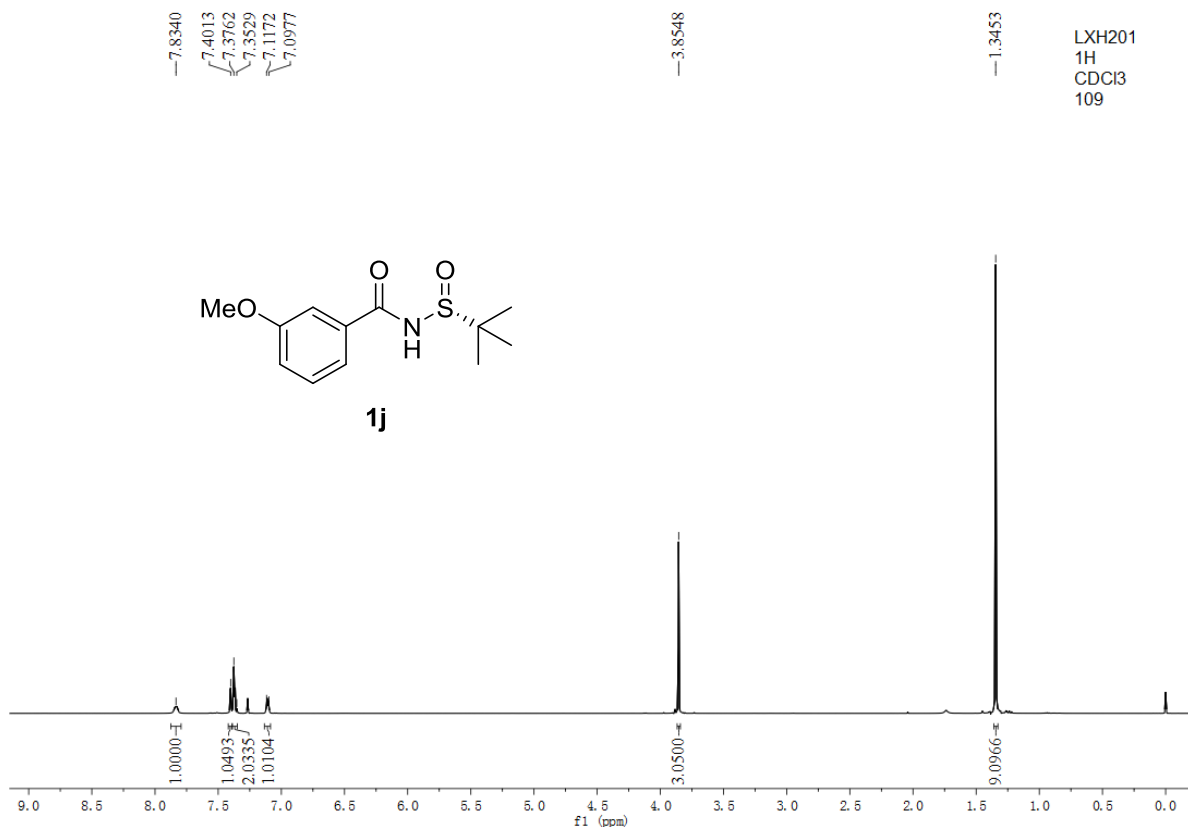

$^1\text{H}$  NMR (600 MHz,  $\text{CDCl}_3$ ) of **1j**

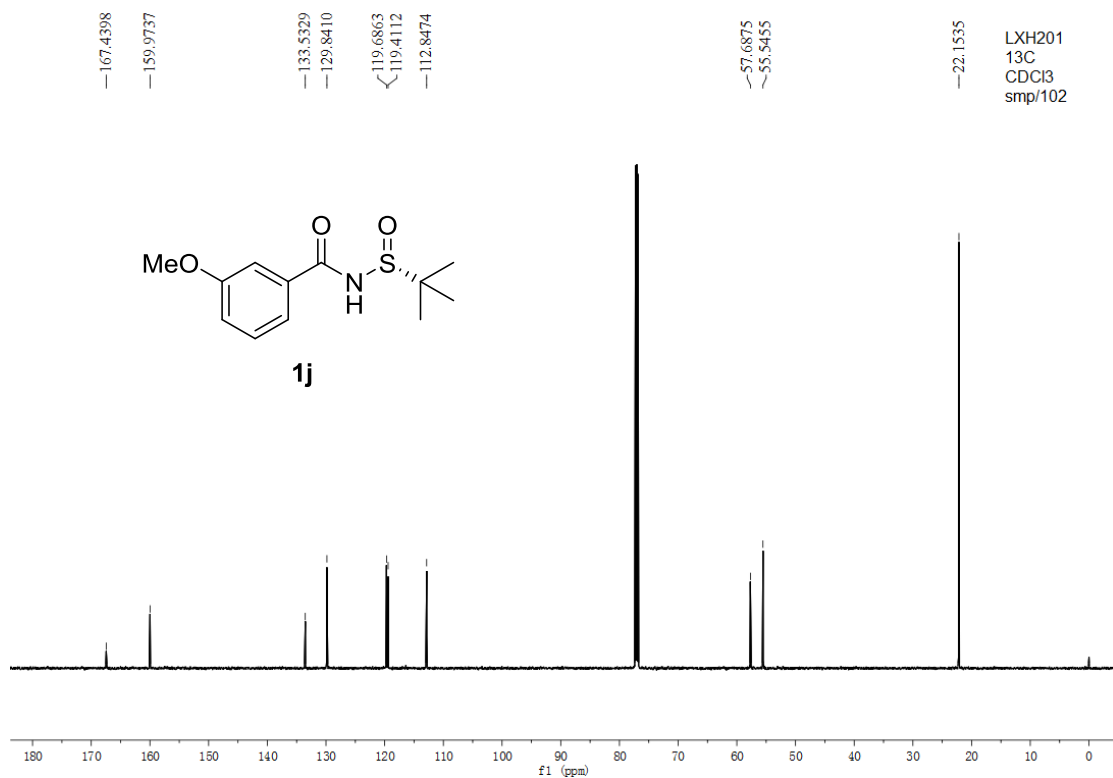

$^{13}\text{C}\{^1\text{H}\}$  NMR (150 MHz,  $\text{CDCl}_3$ ) of **1j**

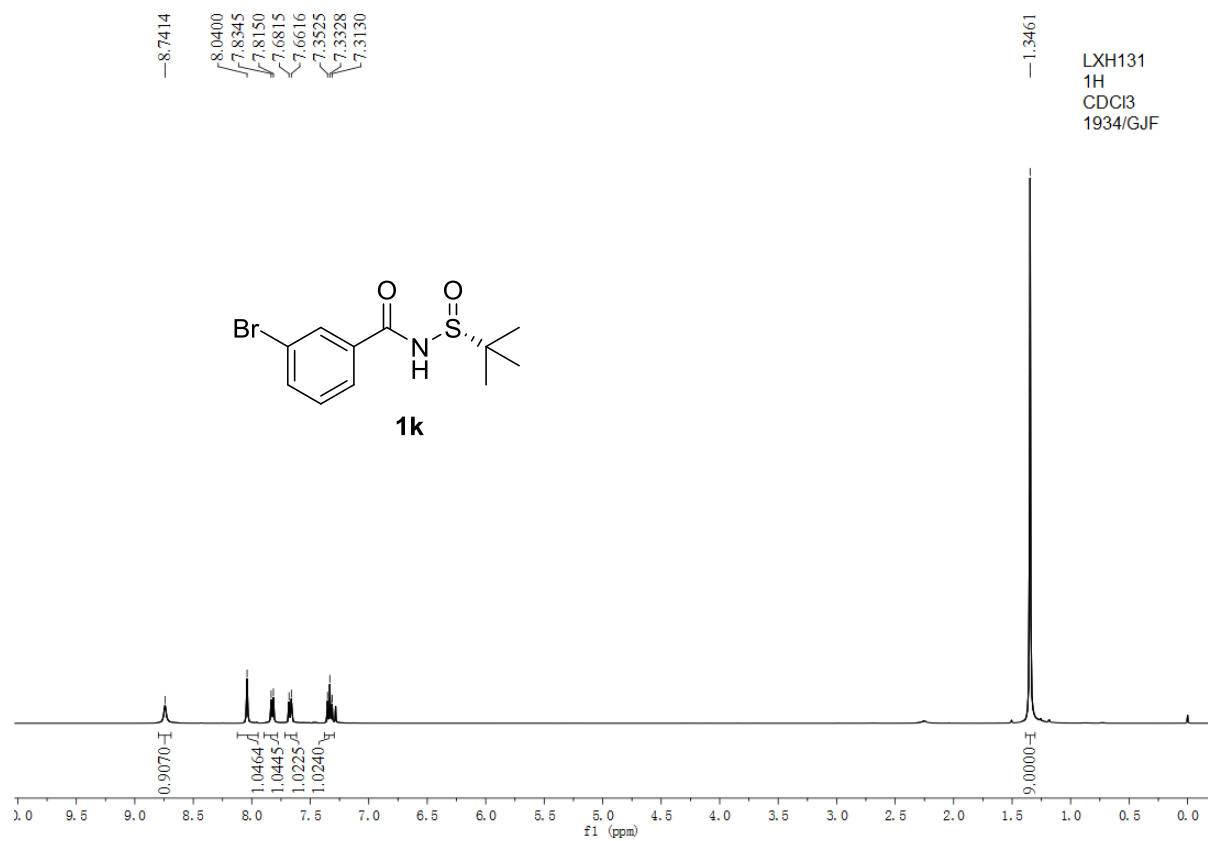

$^1\text{H}$  NMR (400 MHz,  $\text{CDCl}_3$ ) of **1k**

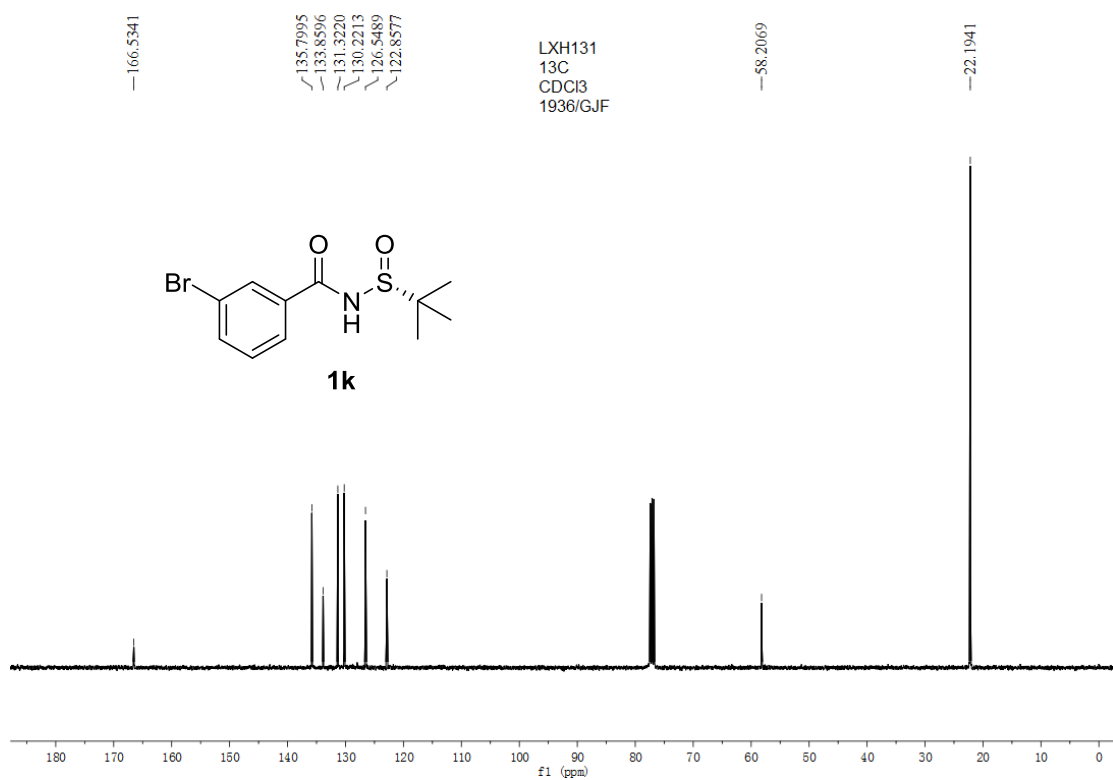

$^{13}\text{C}\{^1\text{H}\}$  NMR (100 MHz,  $\text{CDCl}_3$ ) of **1k**

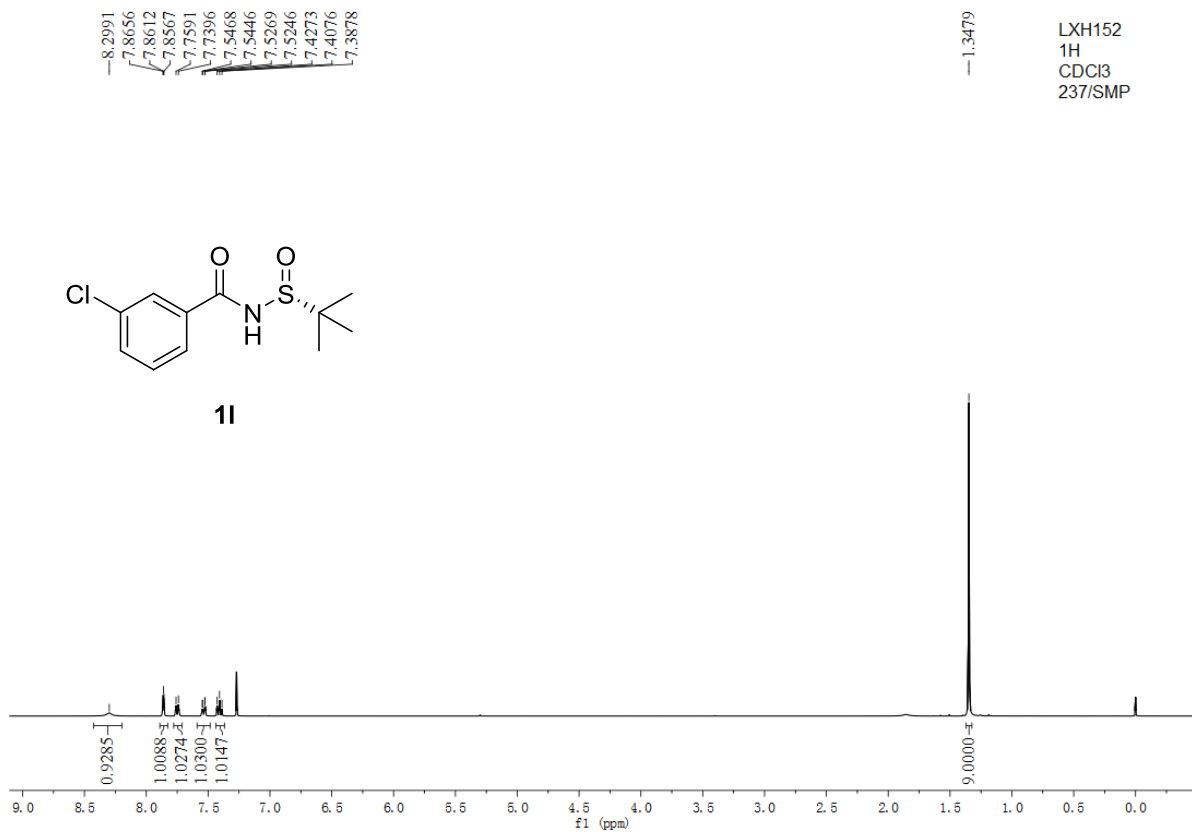

$^1\text{H}$  NMR (400 MHz,  $\text{CDCl}_3$ ) of **11**

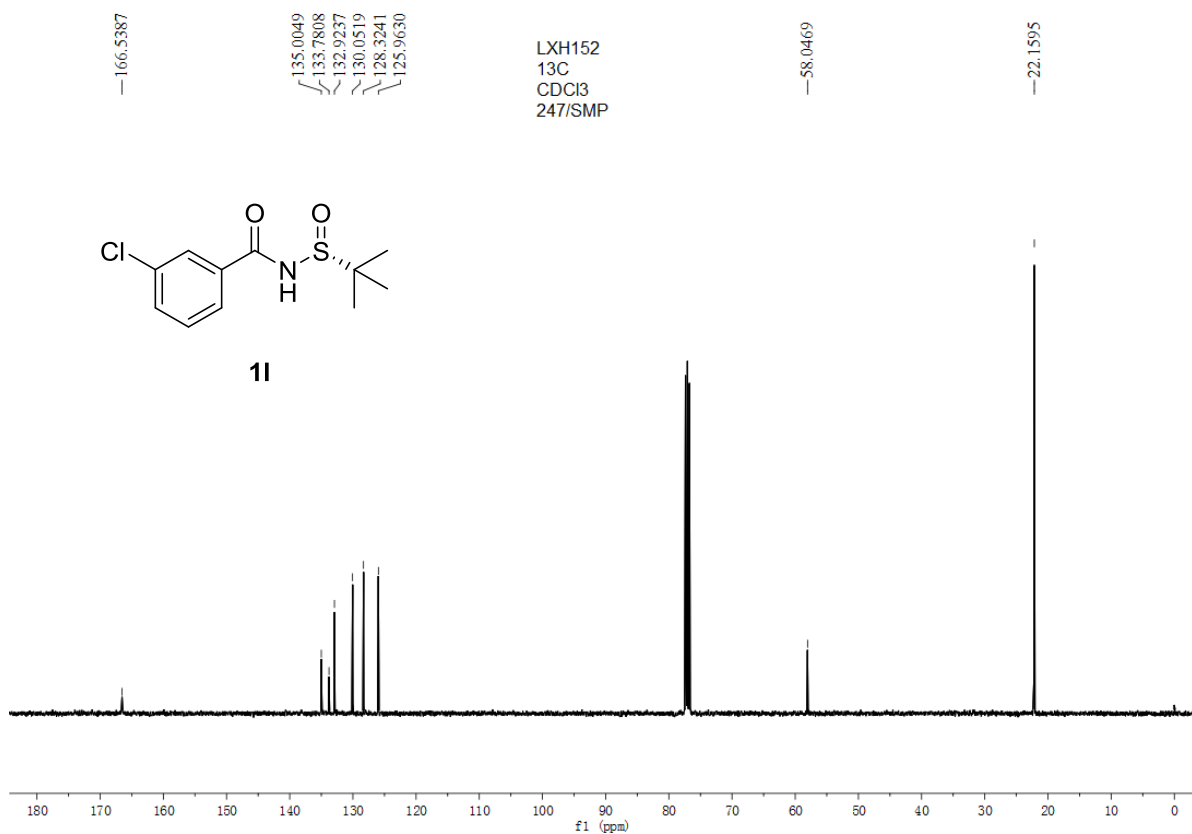

$^{13}\text{C}\{^1\text{H}\}$  NMR (100 MHz,  $\text{CDCl}_3$ ) of **11**

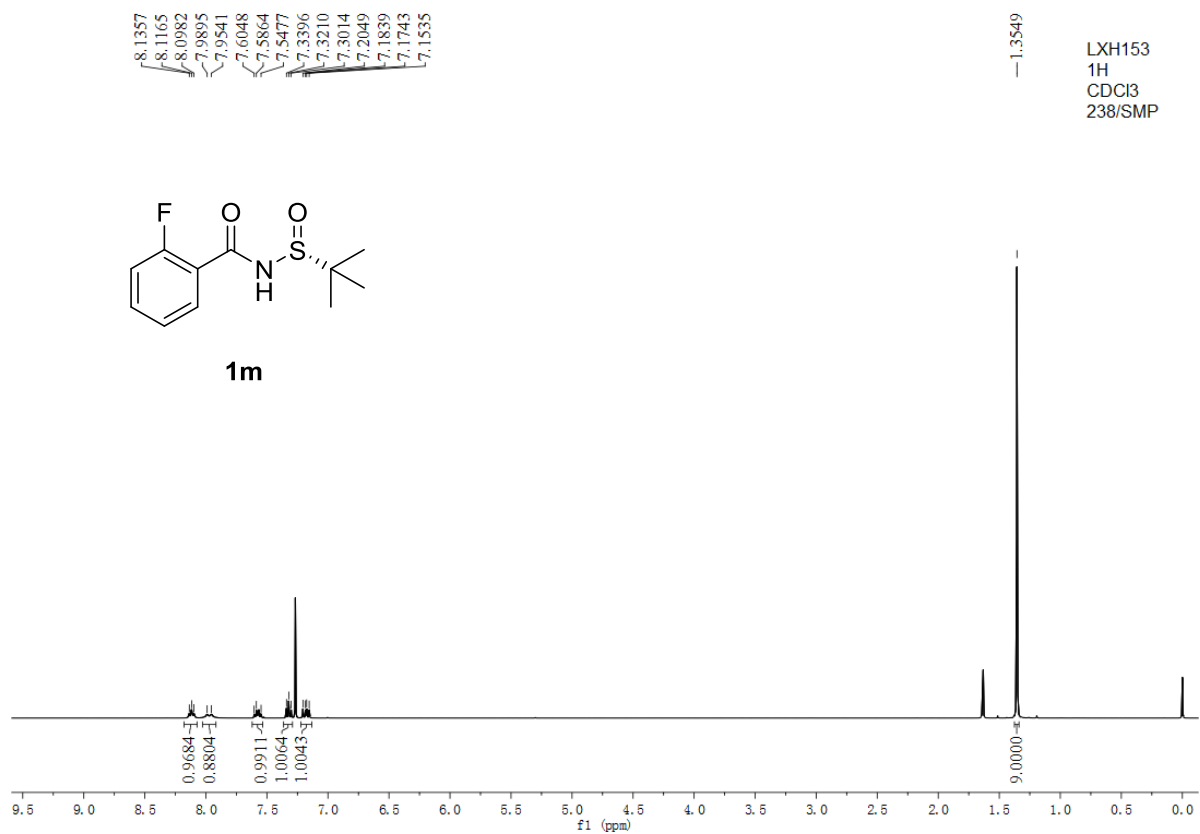

<sup>1</sup>H NMR (400 MHz, CDCl<sub>3</sub>) of **1m**

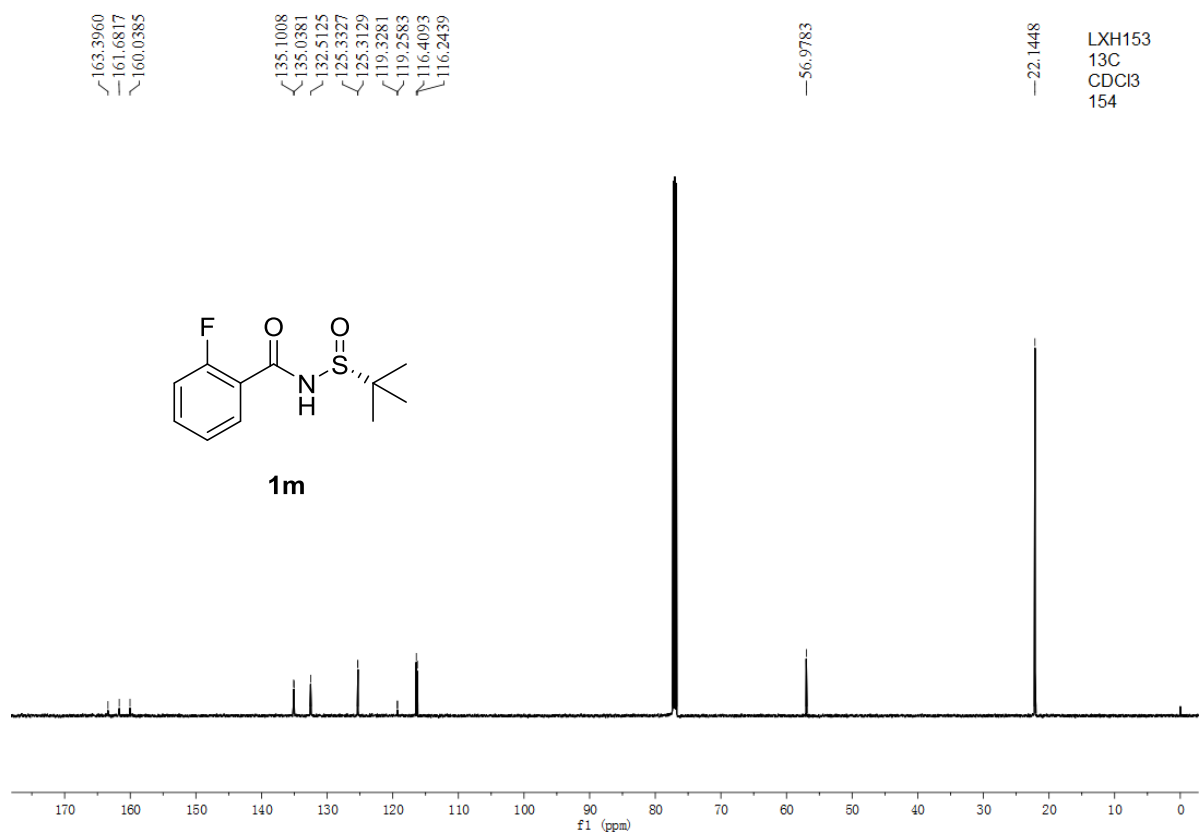

<sup>13</sup>C{<sup>1</sup>H} NMR (150 MHz, CDCl<sub>3</sub>) of **1m**

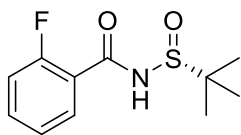

**1m**

-111.8628

LXH-153  
19F  
CDCl3  
smp/171

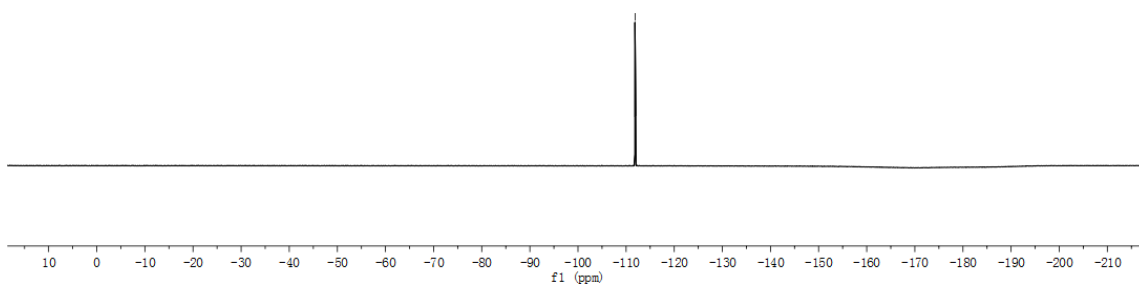

<sup>19</sup>F NMR (565 MHz, CDCl<sub>3</sub>) of **1m**

7.7556  
7.4385  
7.4197  
7.3886  
7.3670  
7.3478  
7.2721  
7.2213

-2.4461

-1.3191

LXH1109  
1H  
CDCl3  
5206/SMP

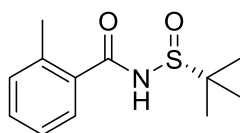

**1n**

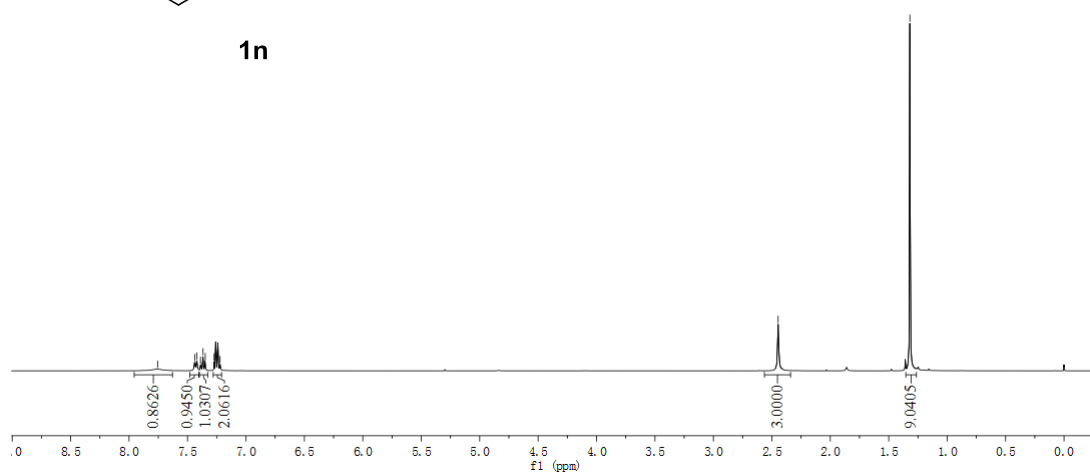

<sup>1</sup>H NMR (400 MHz, CDCl<sub>3</sub>) of **1n**

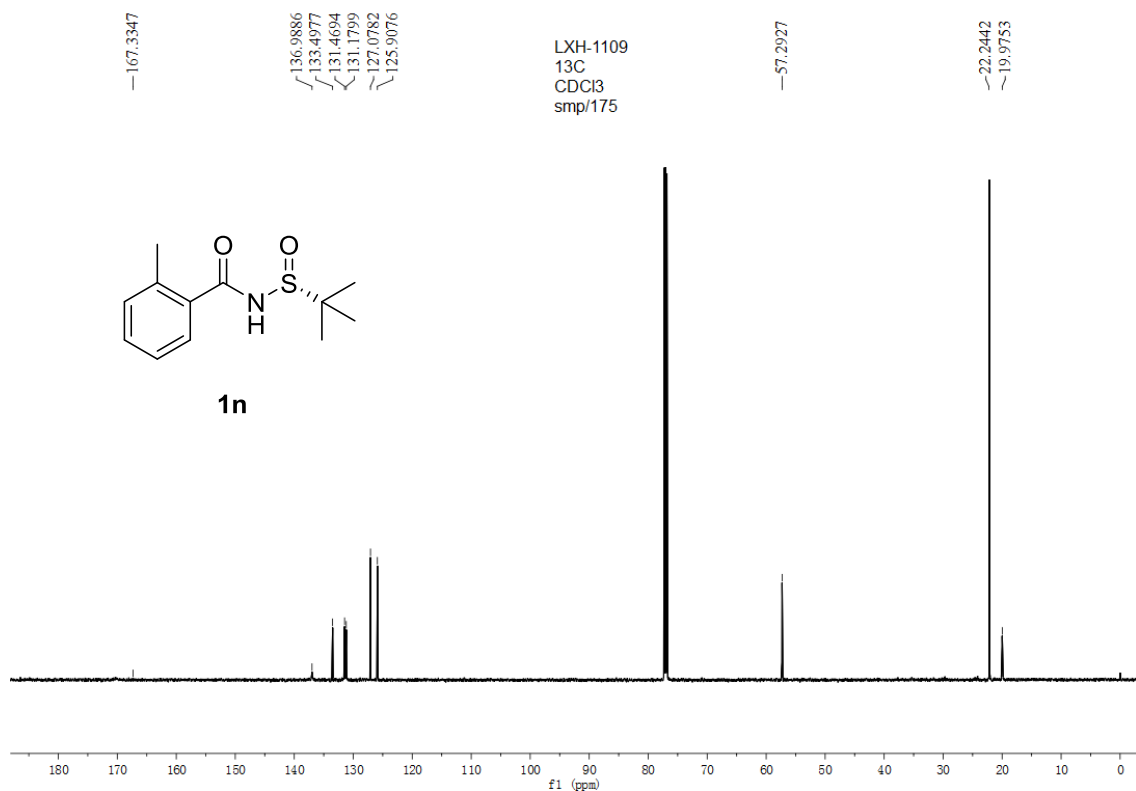

$^{13}\text{C}\{^1\text{H}\}$  NMR (150 MHz,  $\text{CDCl}_3$ ) of **1n**

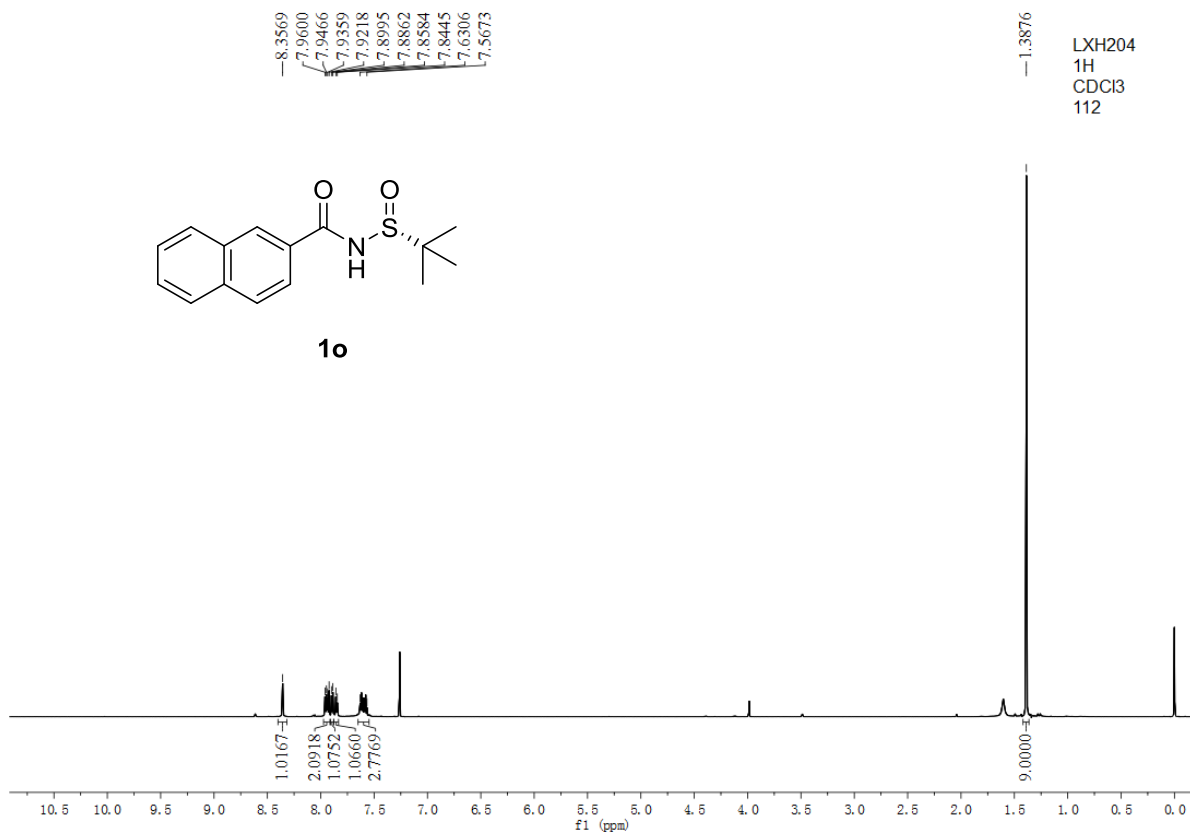

$^1\text{H}$  NMR (600 MHz,  $\text{CDCl}_3$ ) of **1o**

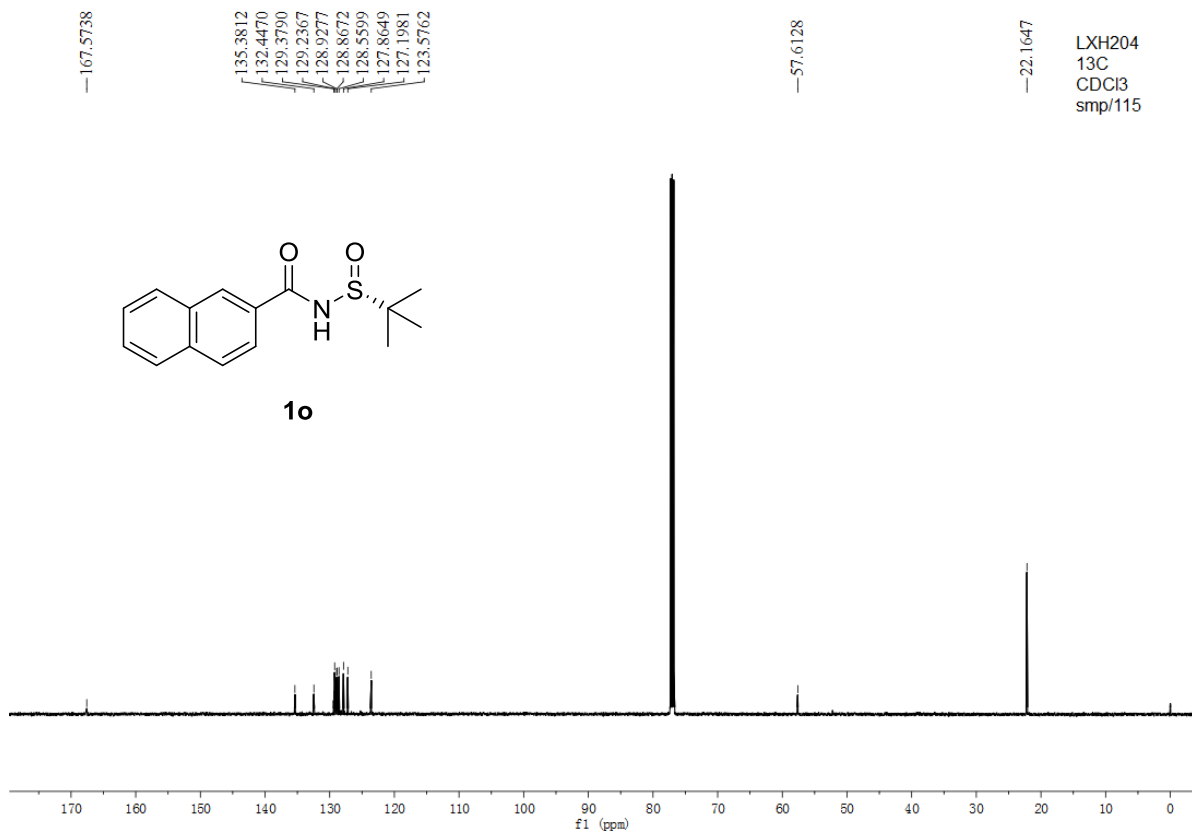

$^{13}\text{C}\{^1\text{H}\}$  NMR (150 MHz,  $\text{CDCl}_3$ ) of **1o**

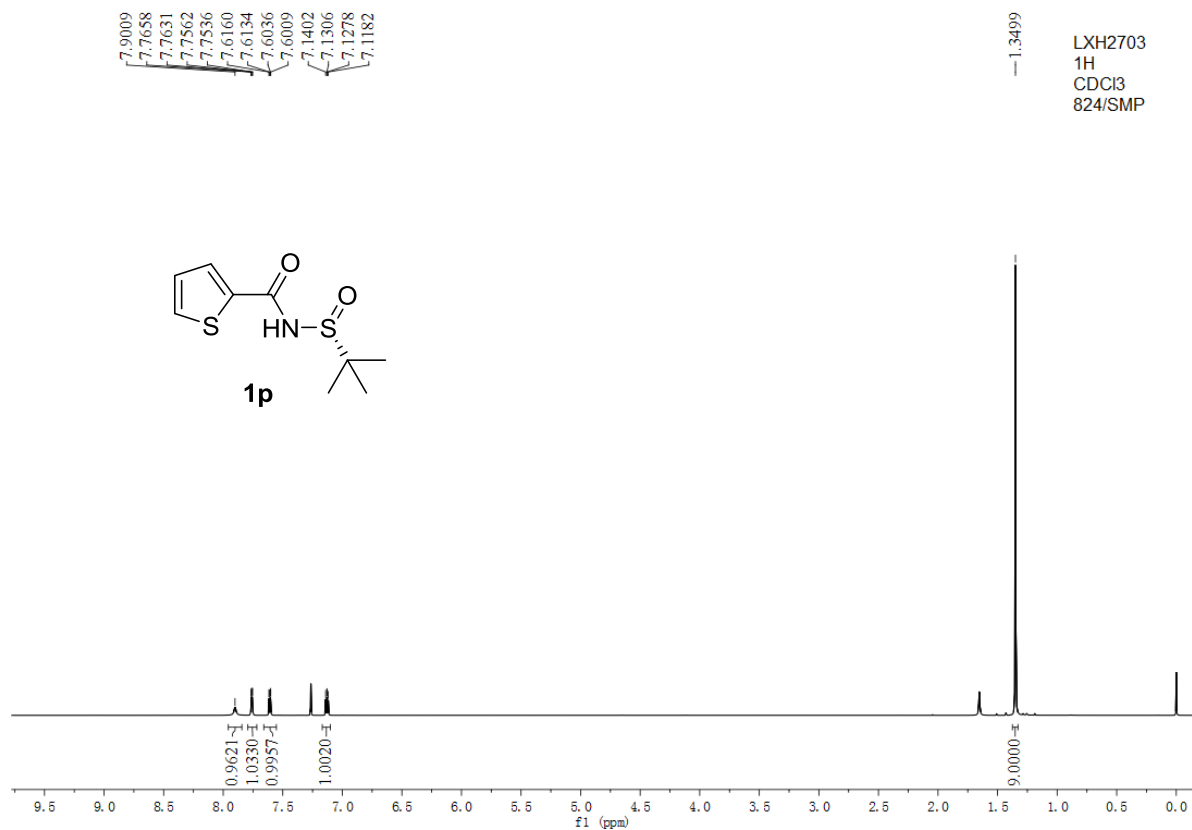

$^1\text{H}$  NMR (400 MHz,  $\text{CDCl}_3$ ) of **1p**

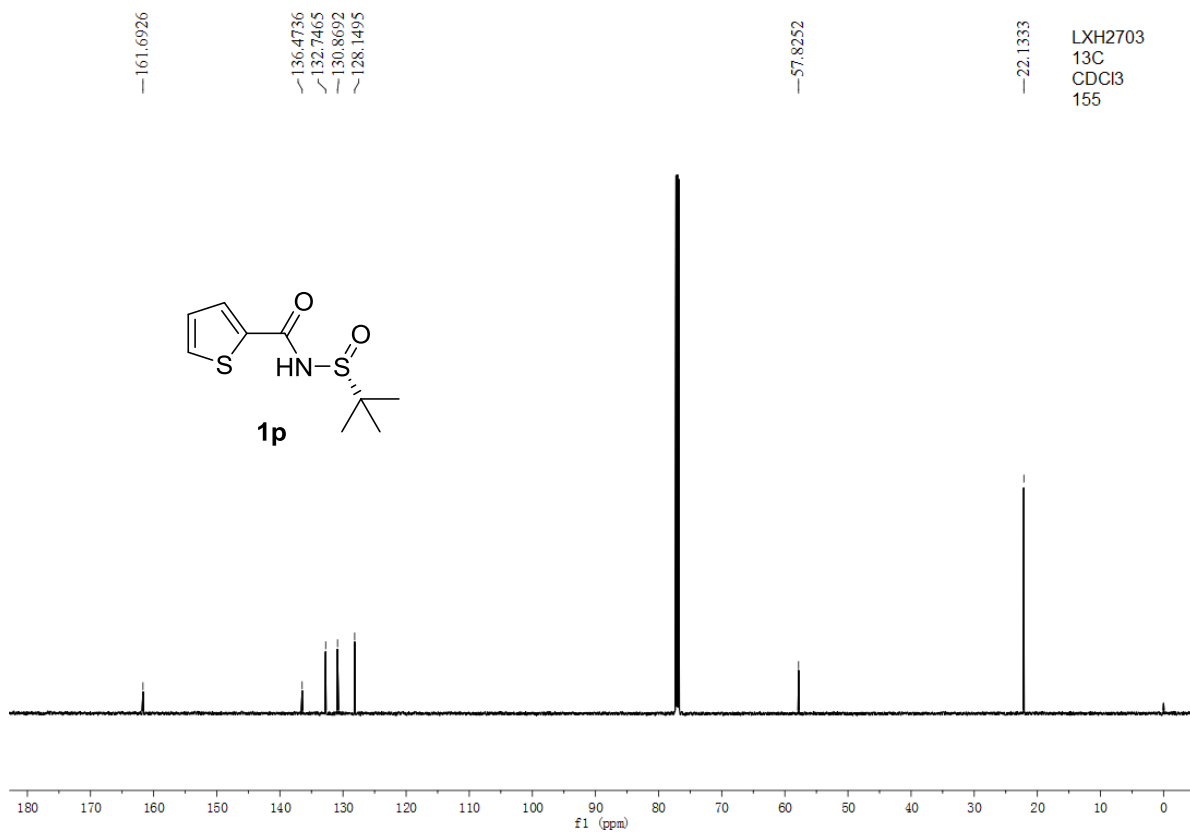

<sup>13</sup>C{<sup>1</sup>H} NMR (150 MHz, CDCl<sub>3</sub>) of **1p**

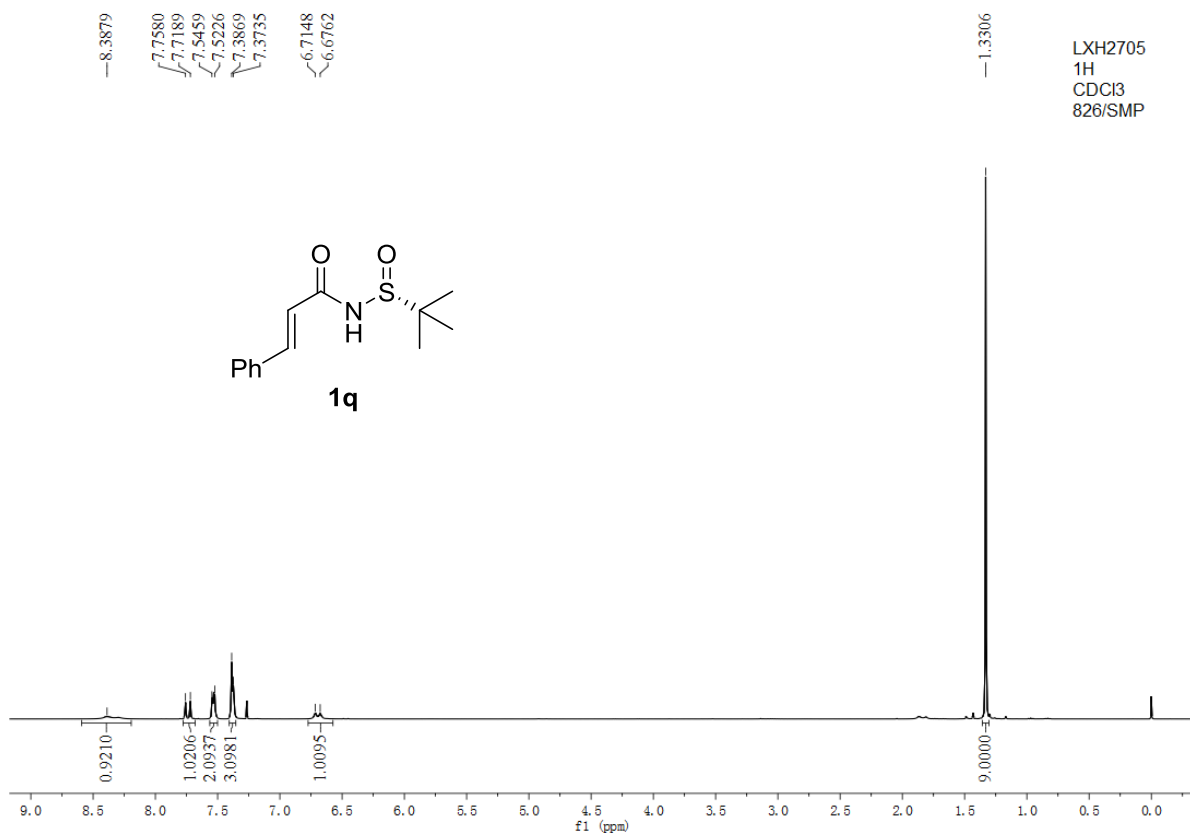

<sup>1</sup>H NMR (400 MHz, CDCl<sub>3</sub>) of **1q**



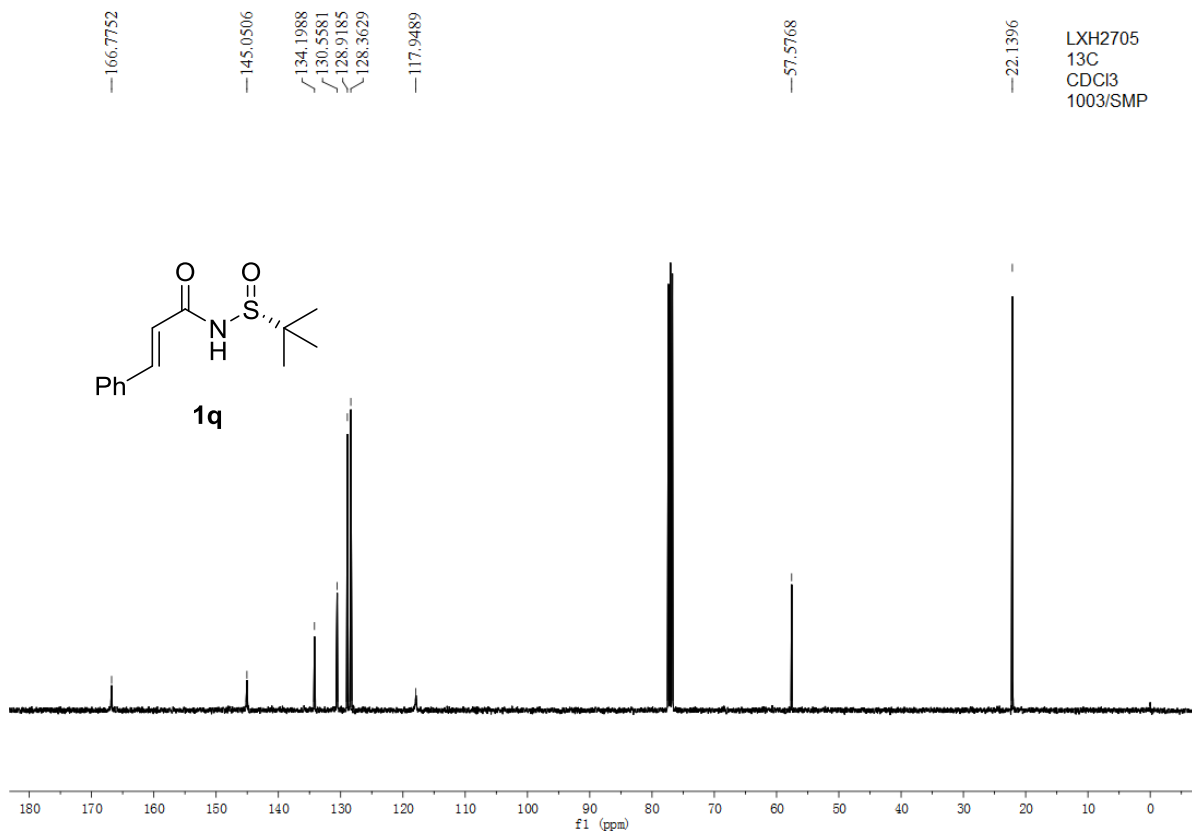

$^{13}\text{C}\{^1\text{H}\}$  NMR (100 MHz,  $\text{CDCl}_3$ ) of **1q**

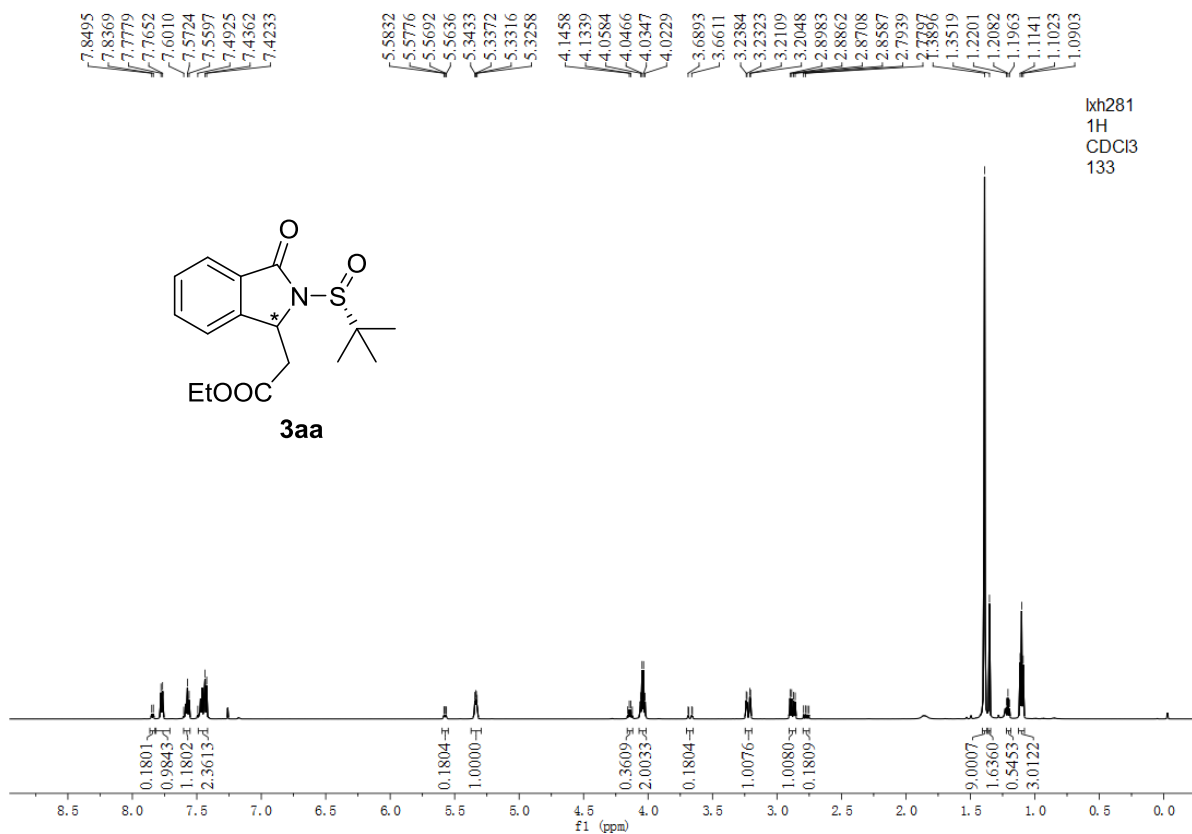

$^1\text{H}$  NMR (600 MHz,  $\text{CDCl}_3$ ) of **3aa**

lxh281  
 1H  
 $\text{CDCl}_3$   
 133

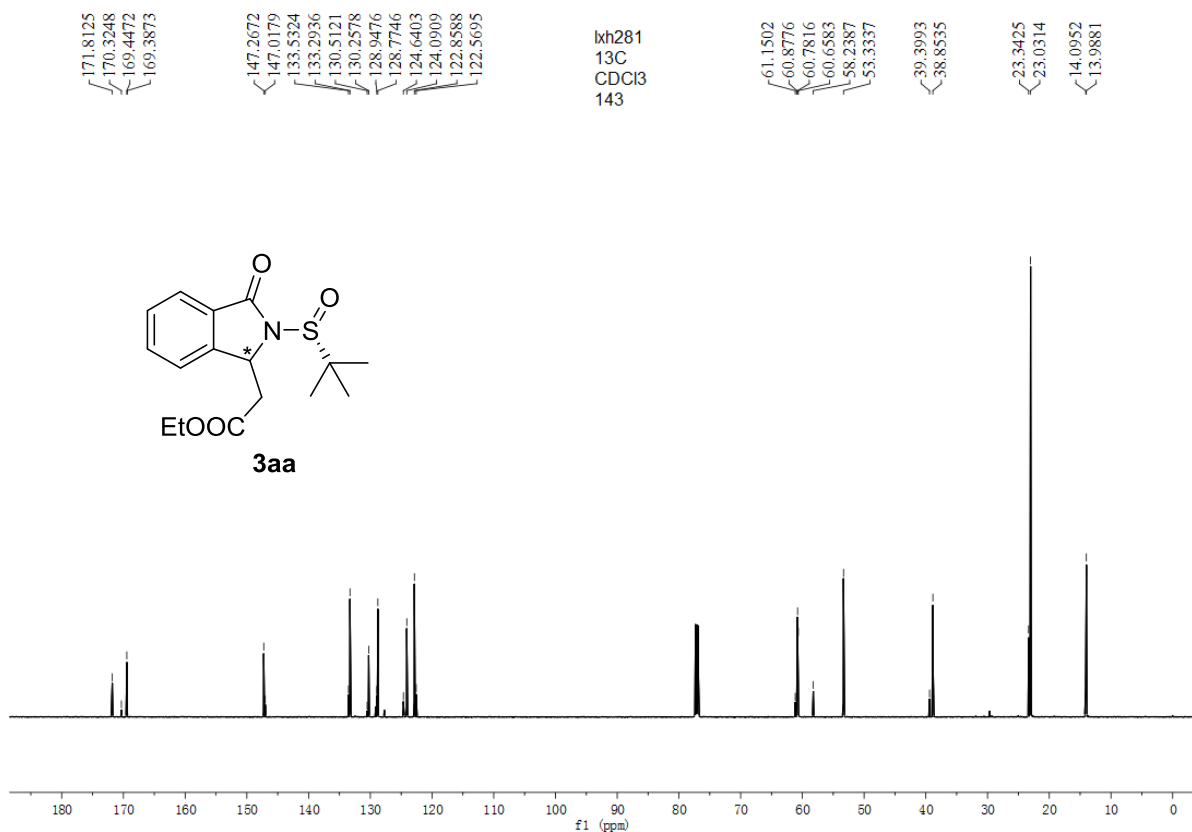

$^{13}\text{C}\{^1\text{H}\}$  NMR (150 MHz,  $\text{CDCl}_3$ ) of **3aa**

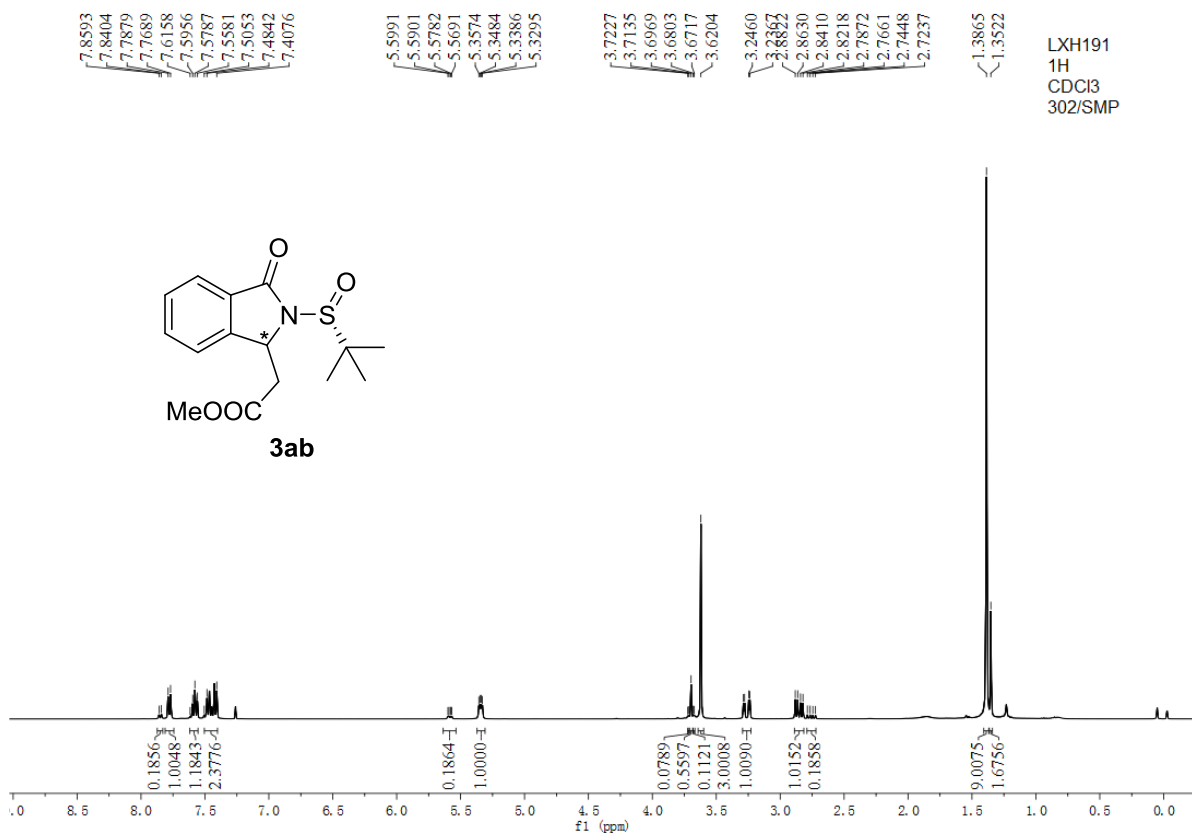

$^1\text{H}$  NMR (400 MHz,  $\text{CDCl}_3$ ) of **3ab**

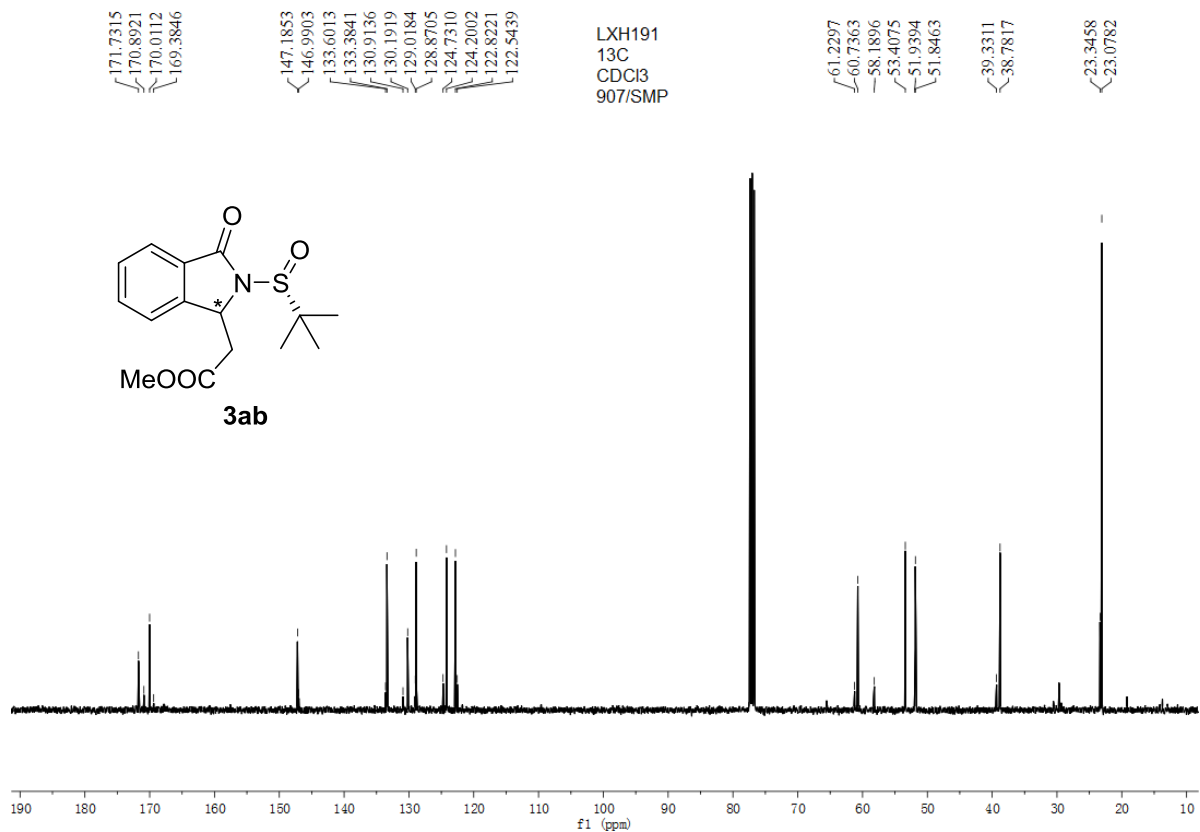

<sup>13</sup>C{<sup>1</sup>H} NMR (100 MHz, CDCl<sub>3</sub>) of **3ab**

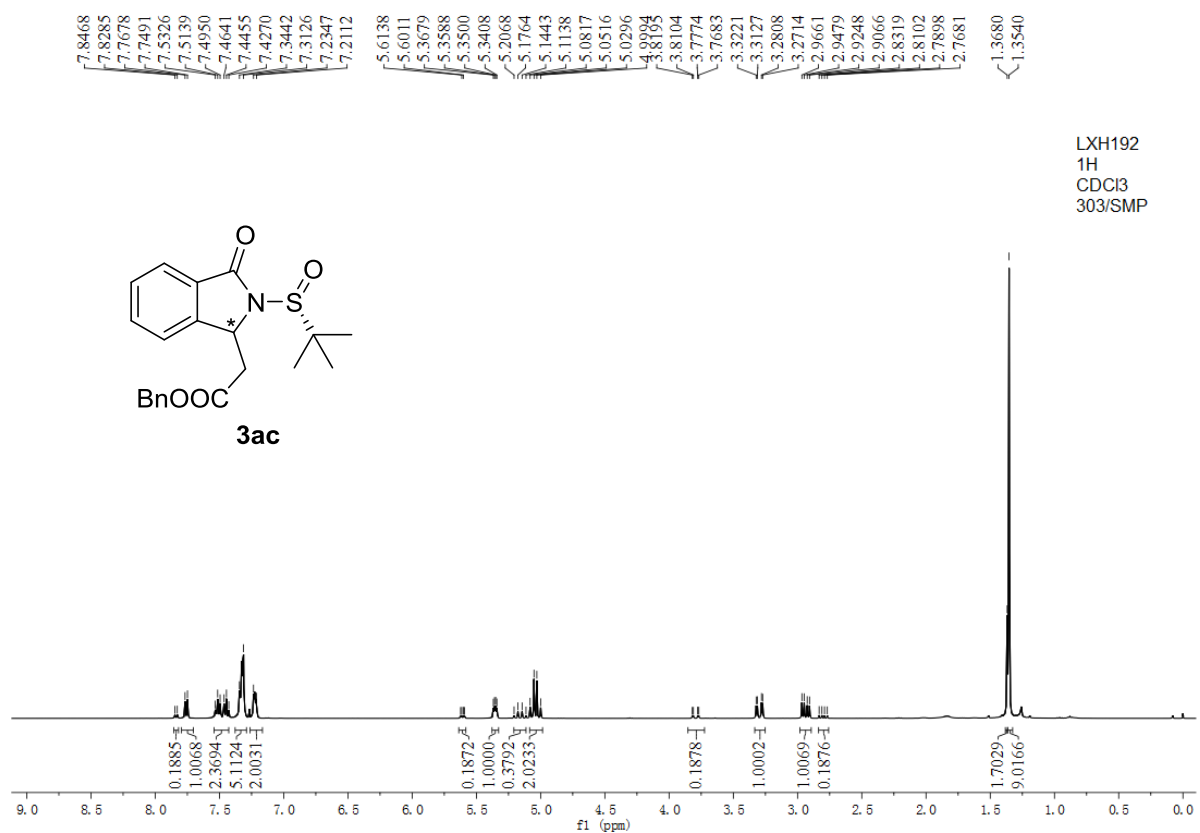

<sup>1</sup>H NMR (400 MHz, CDCl<sub>3</sub>) of **3ac**

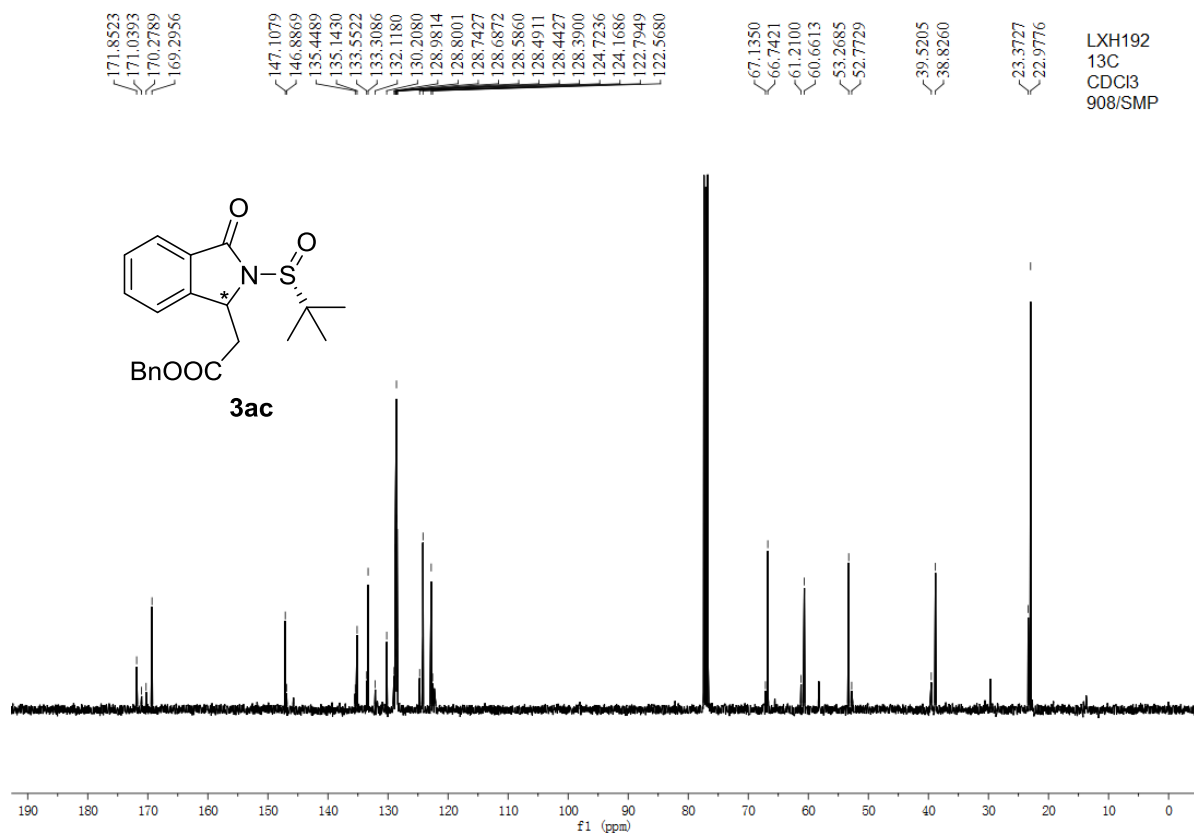

<sup>13</sup>C{<sup>1</sup>H} NMR (100 MHz, CDCl<sub>3</sub>) of **3ac**

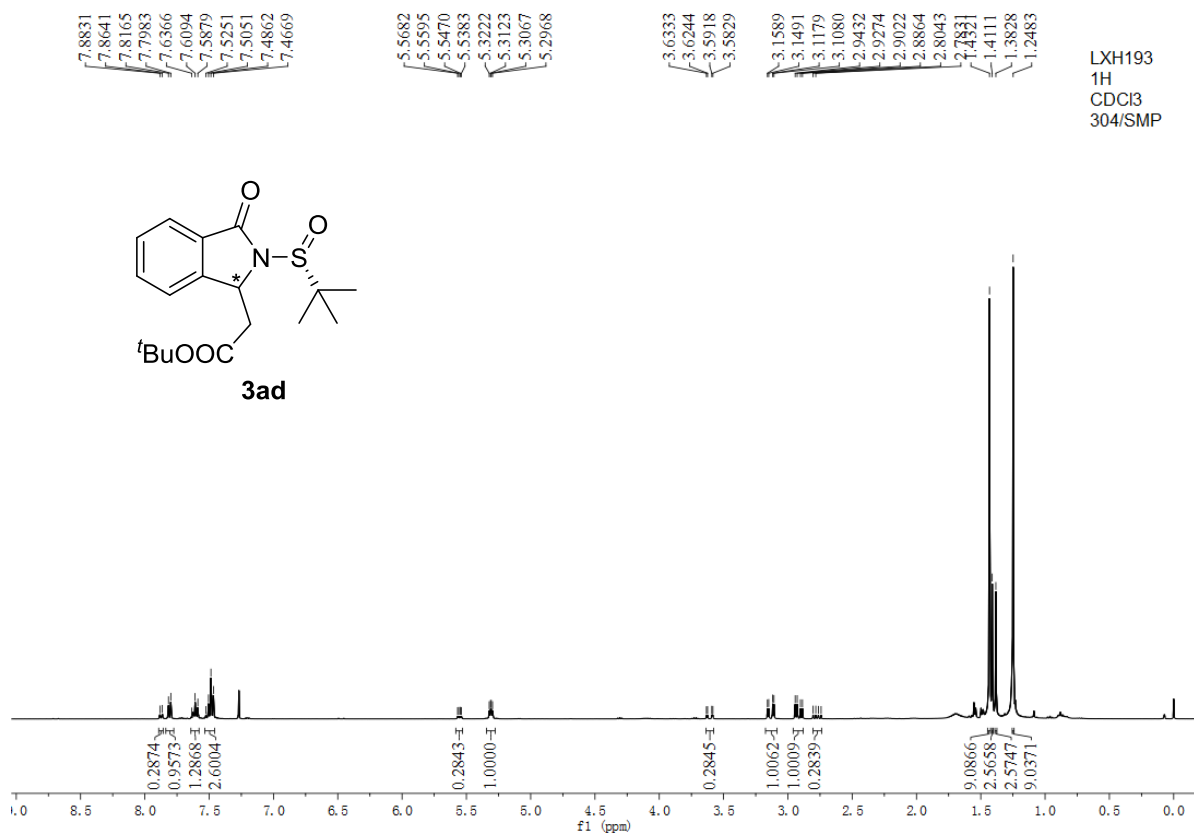

<sup>1</sup>H NMR (400 MHz, CDCl<sub>3</sub>) of **3ad**

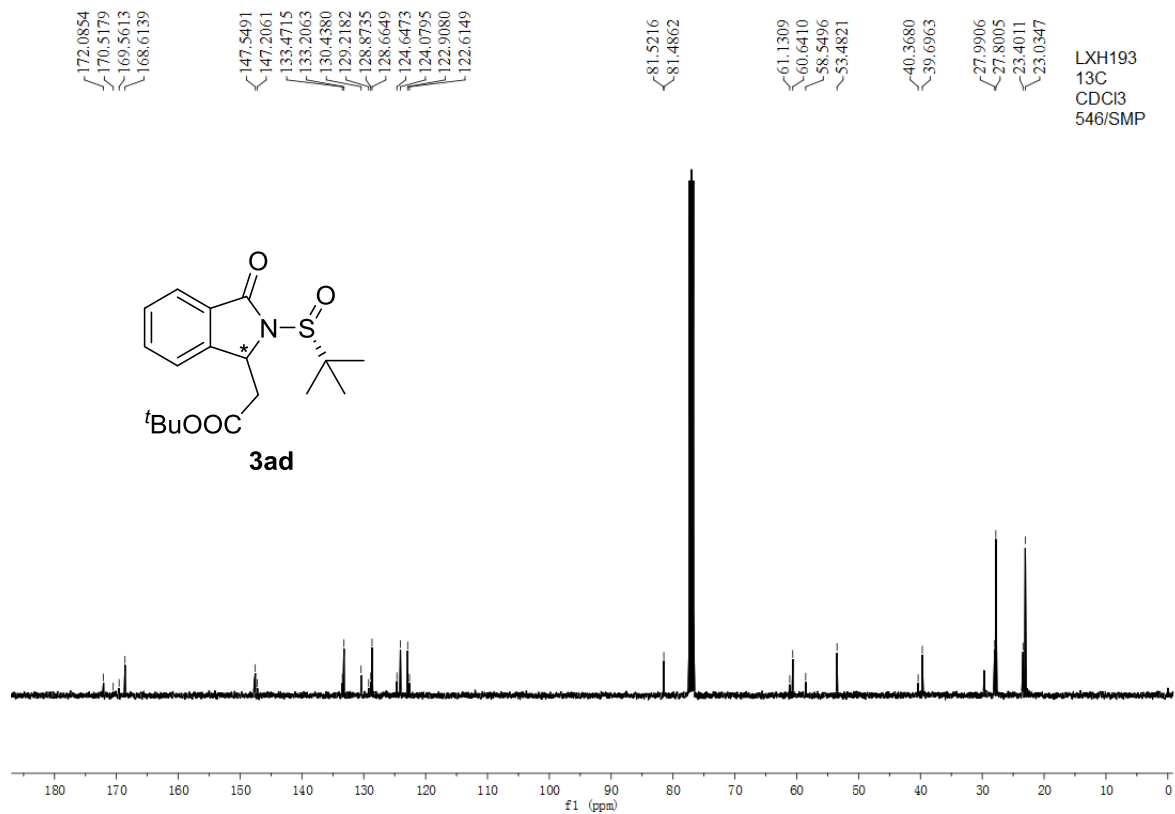

$^{13}\text{C}\{^1\text{H}\}$  NMR (100 MHz,  $\text{CDCl}_3$ ) of **3ad**

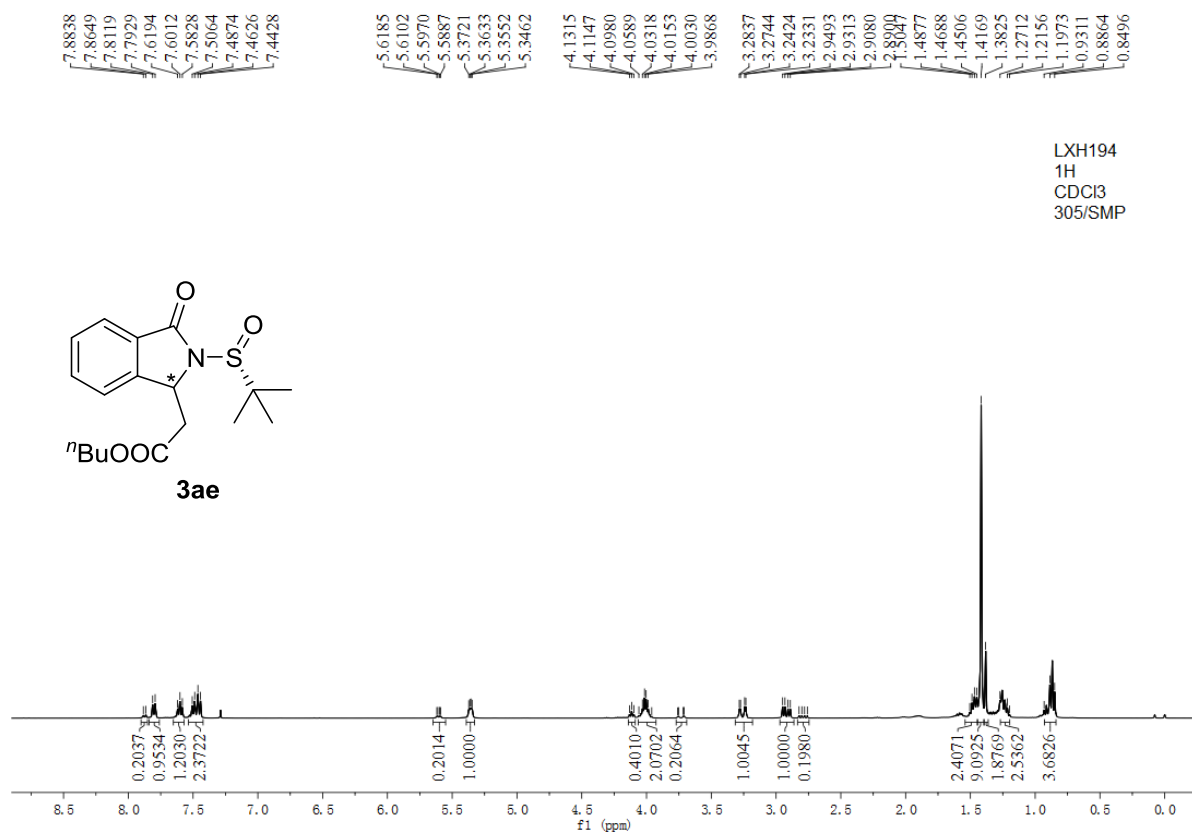

$^1\text{H}$  NMR (400 MHz,  $\text{CDCl}_3$ ) of **3ae**

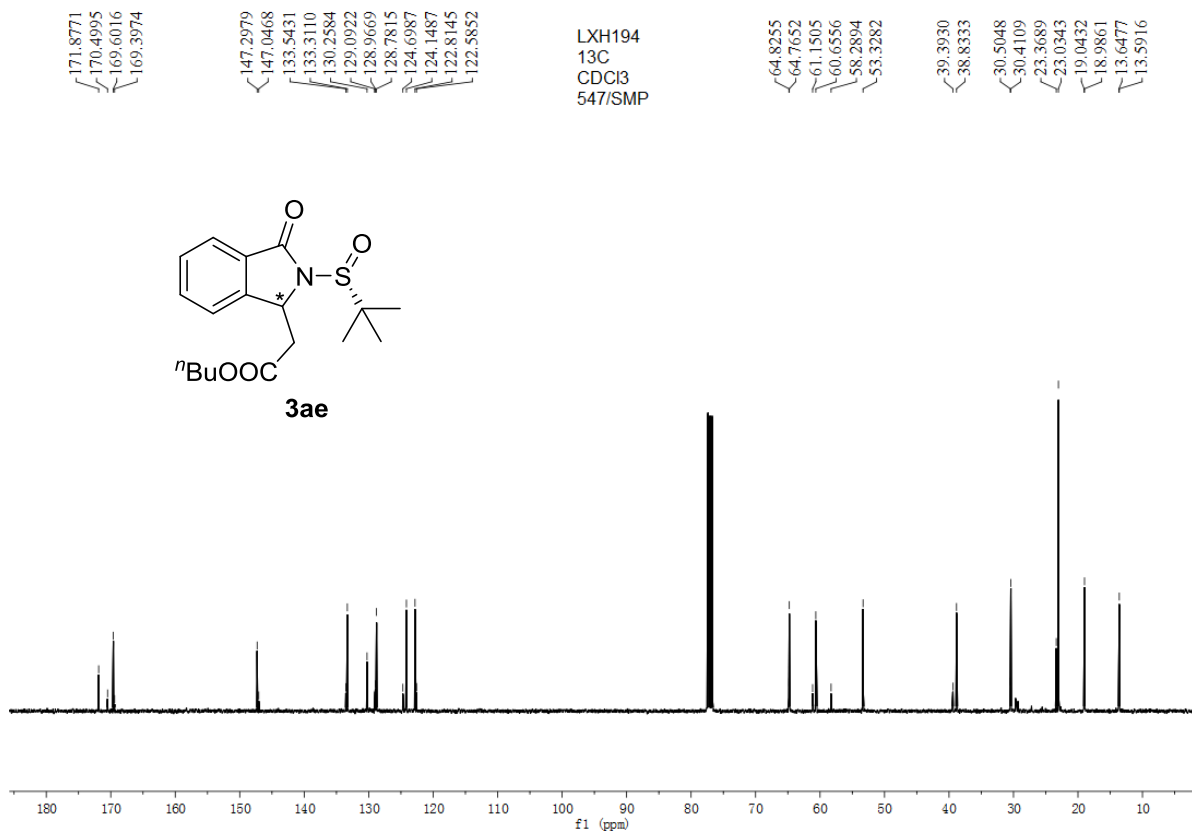

$^{13}\text{C}\{^1\text{H}\}$  NMR (100 MHz,  $\text{CDCl}_3$ ) of **3ae**

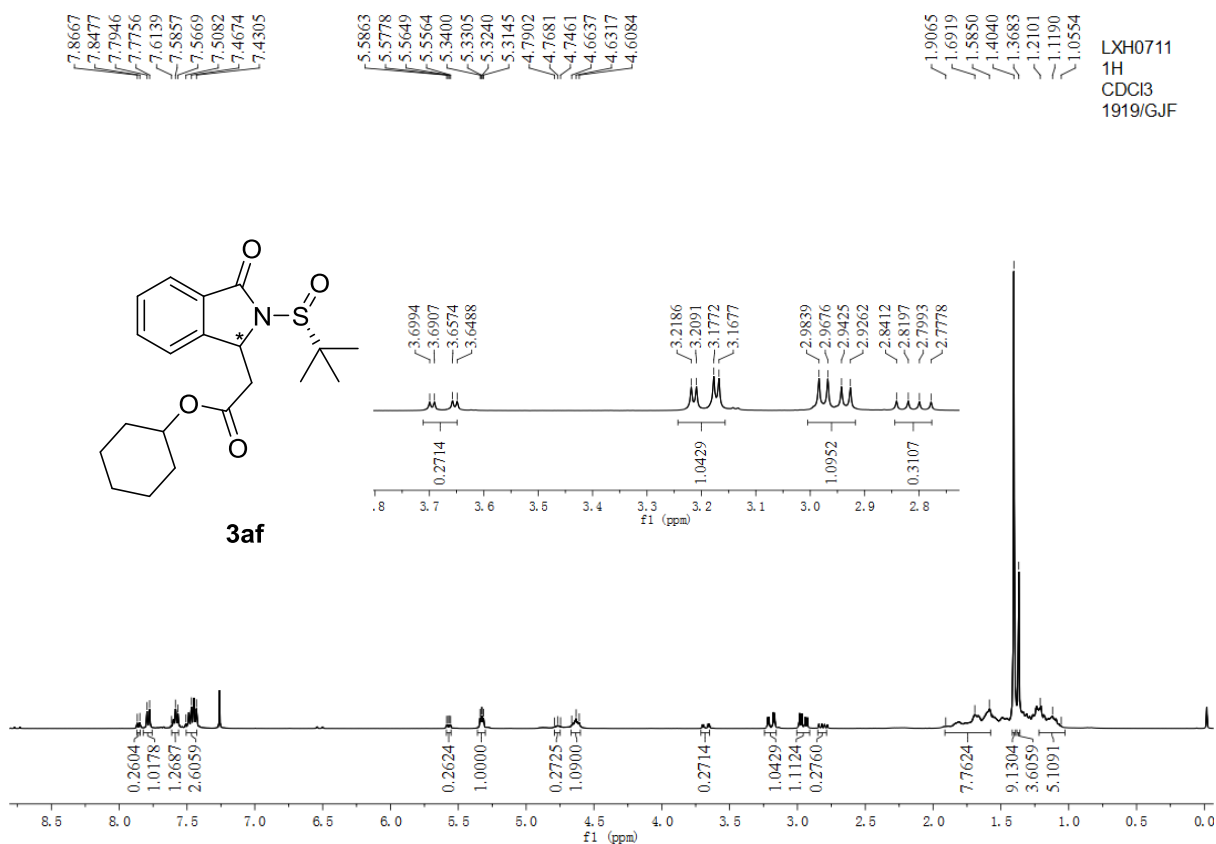

$^1\text{H}$  NMR (400 MHz,  $\text{CDCl}_3$ ) of **3af**

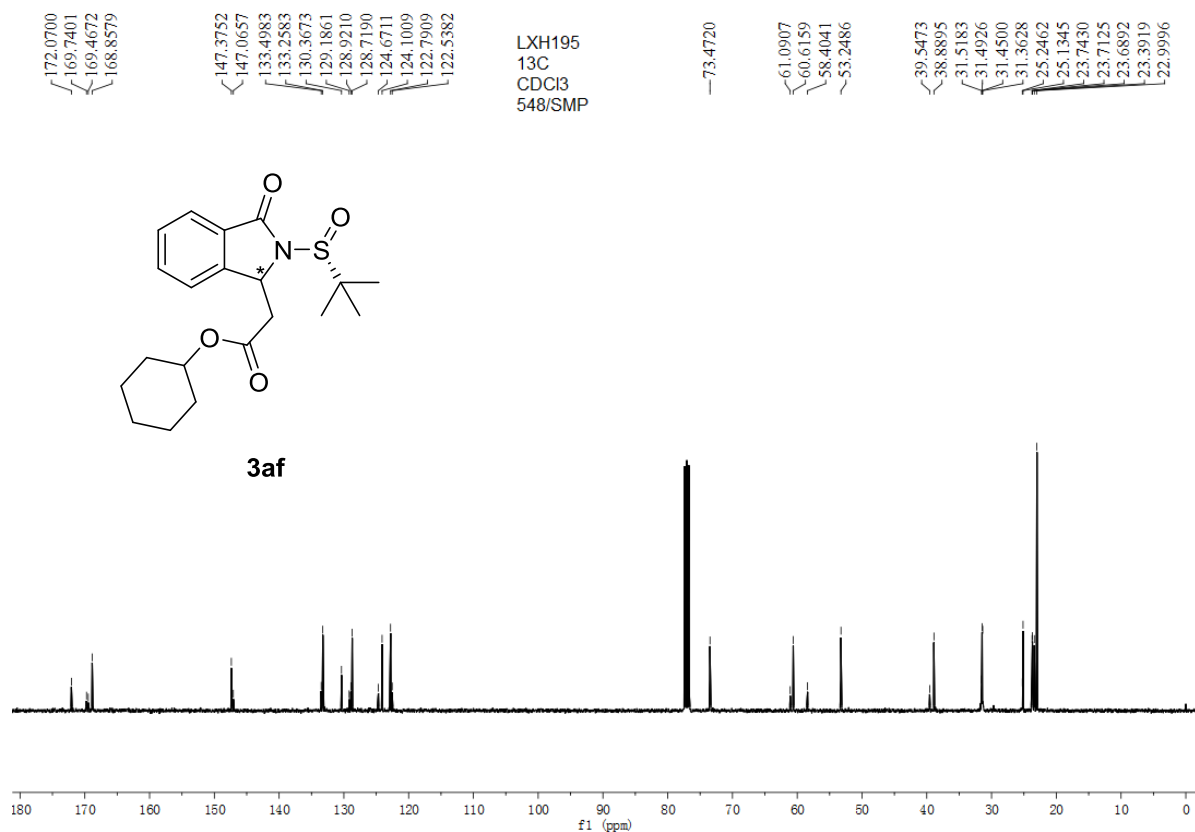

<sup>13</sup>C {<sup>1</sup>H} NMR (100 MHz, CDCl<sub>3</sub>) of **3af**

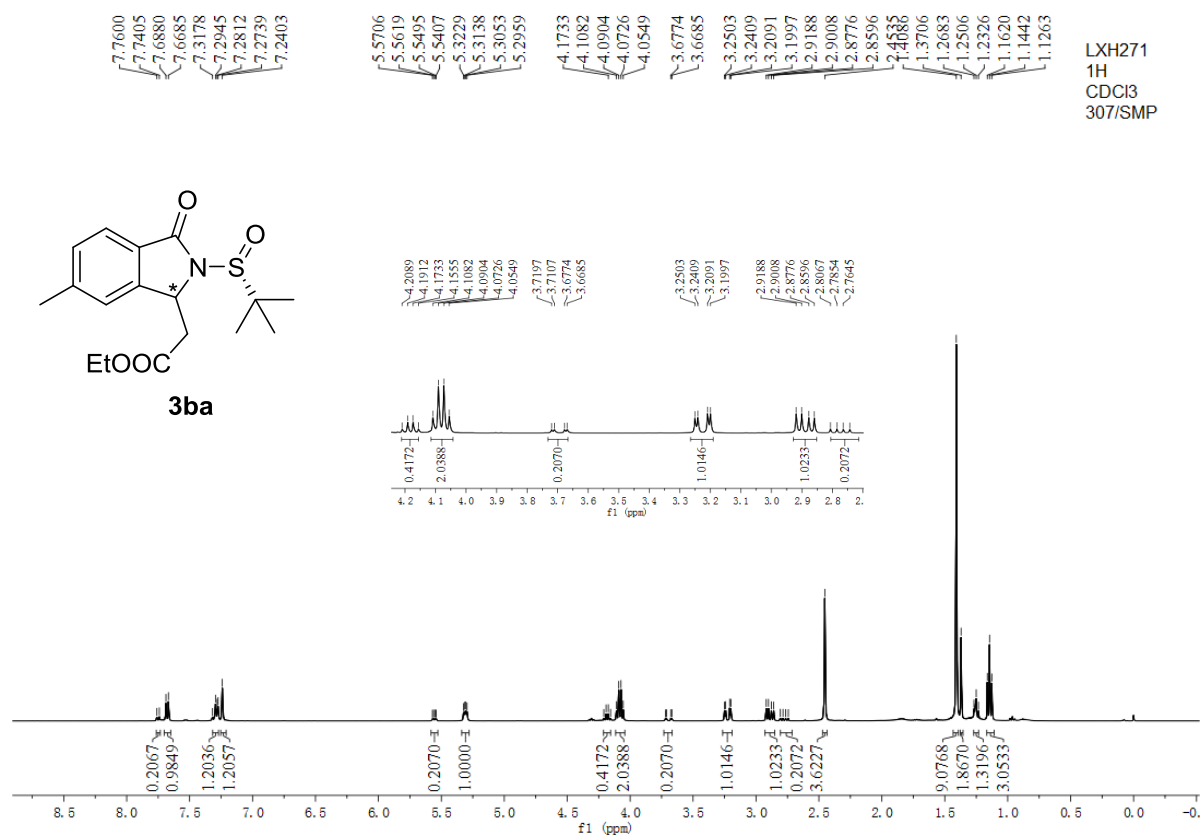

<sup>1</sup>H NMR (400 MHz, CDCl<sub>3</sub>) of **3ba**

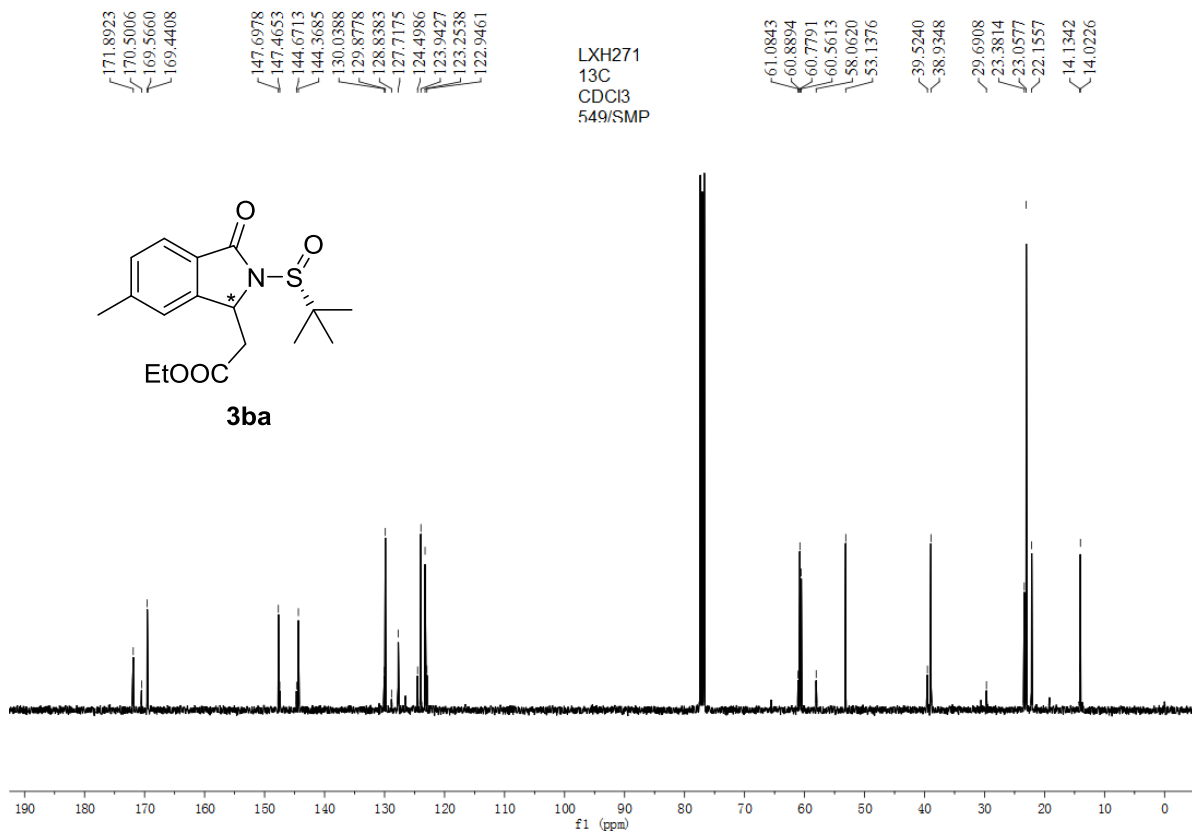

<sup>13</sup>C{<sup>1</sup>H} NMR (100 MHz, CDCl<sub>3</sub>) of **3ba**

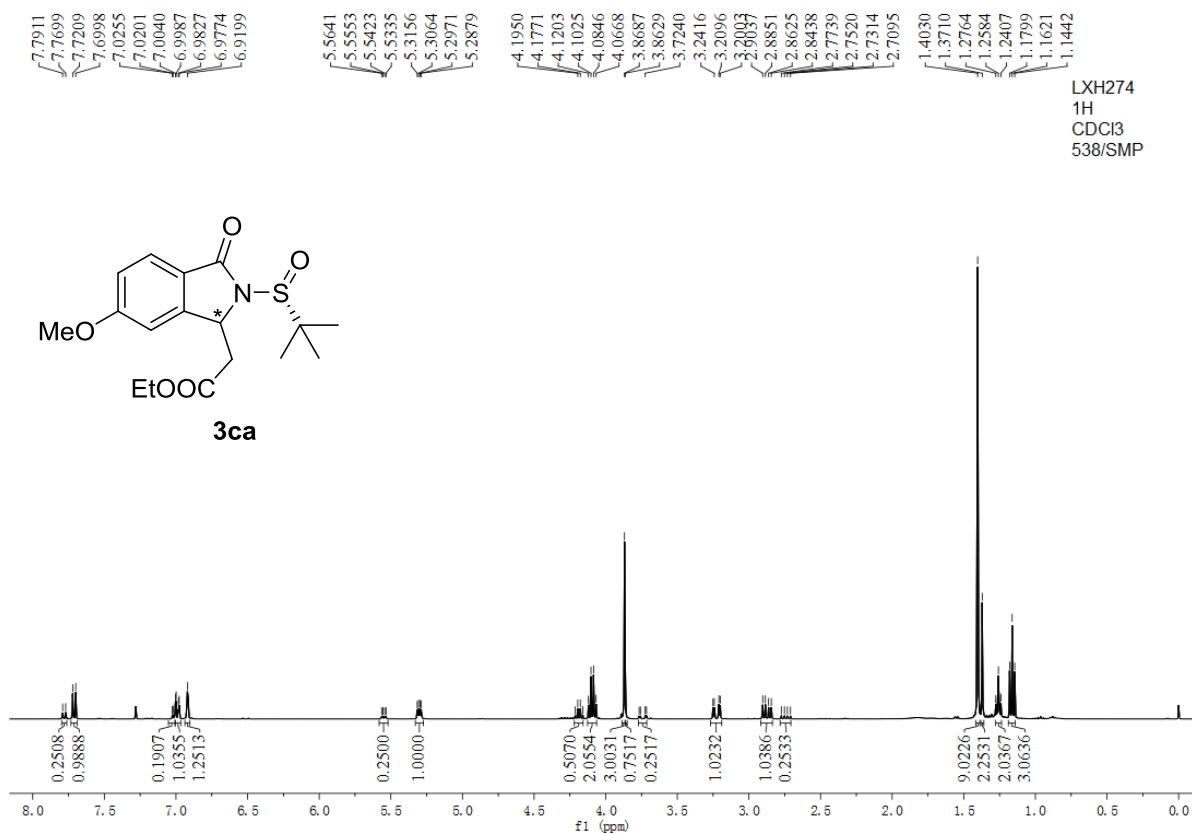

<sup>1</sup>H NMR (400 MHz, CDCl<sub>3</sub>) of **3ca**



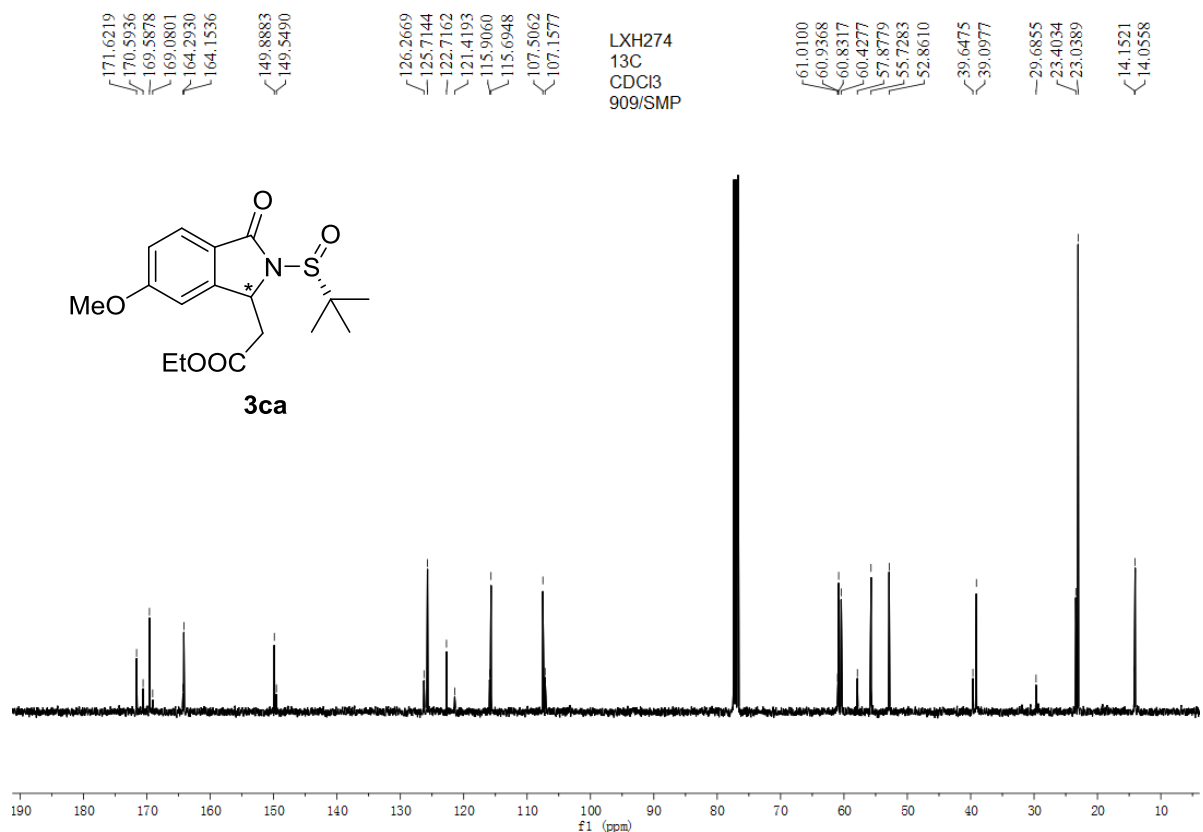

<sup>13</sup>C {<sup>1</sup>H} NMR (100 MHz, CDCl<sub>3</sub>) of **3ca**

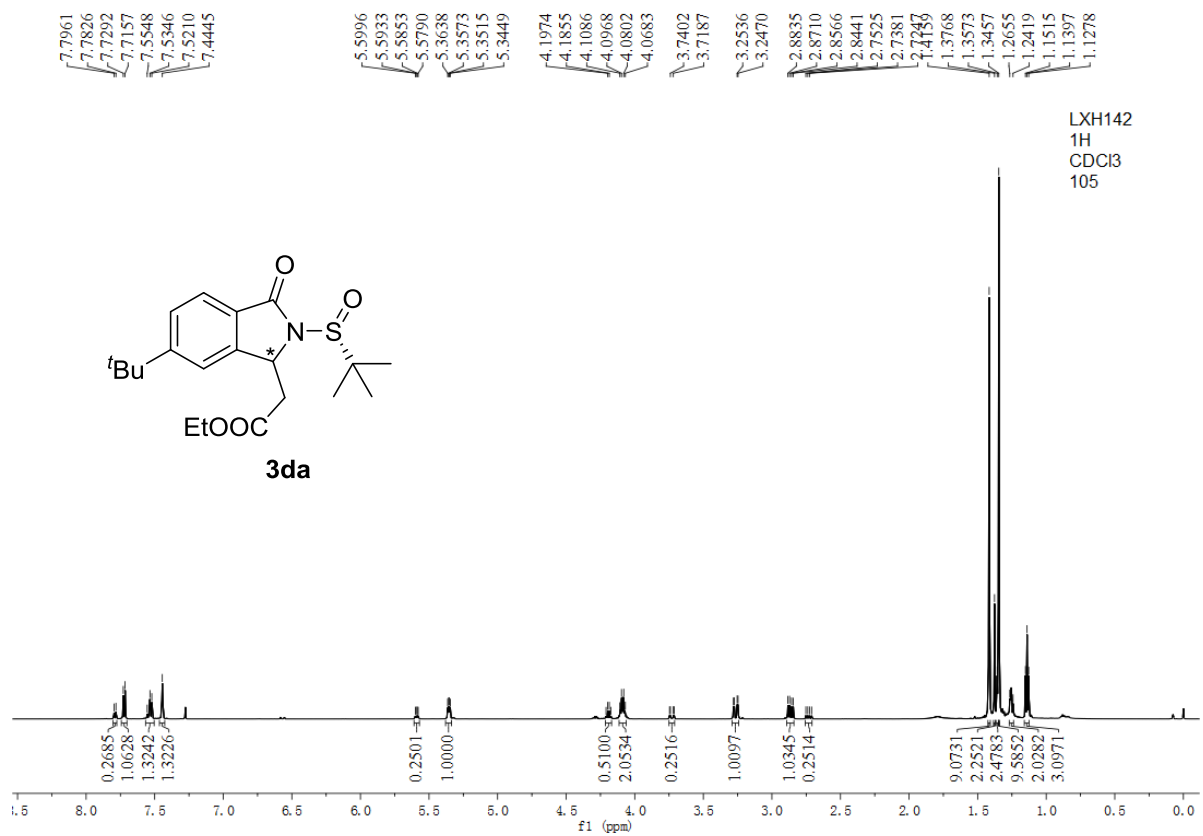

<sup>1</sup>H NMR (600 MHz, CDCl<sub>3</sub>) of **3da**

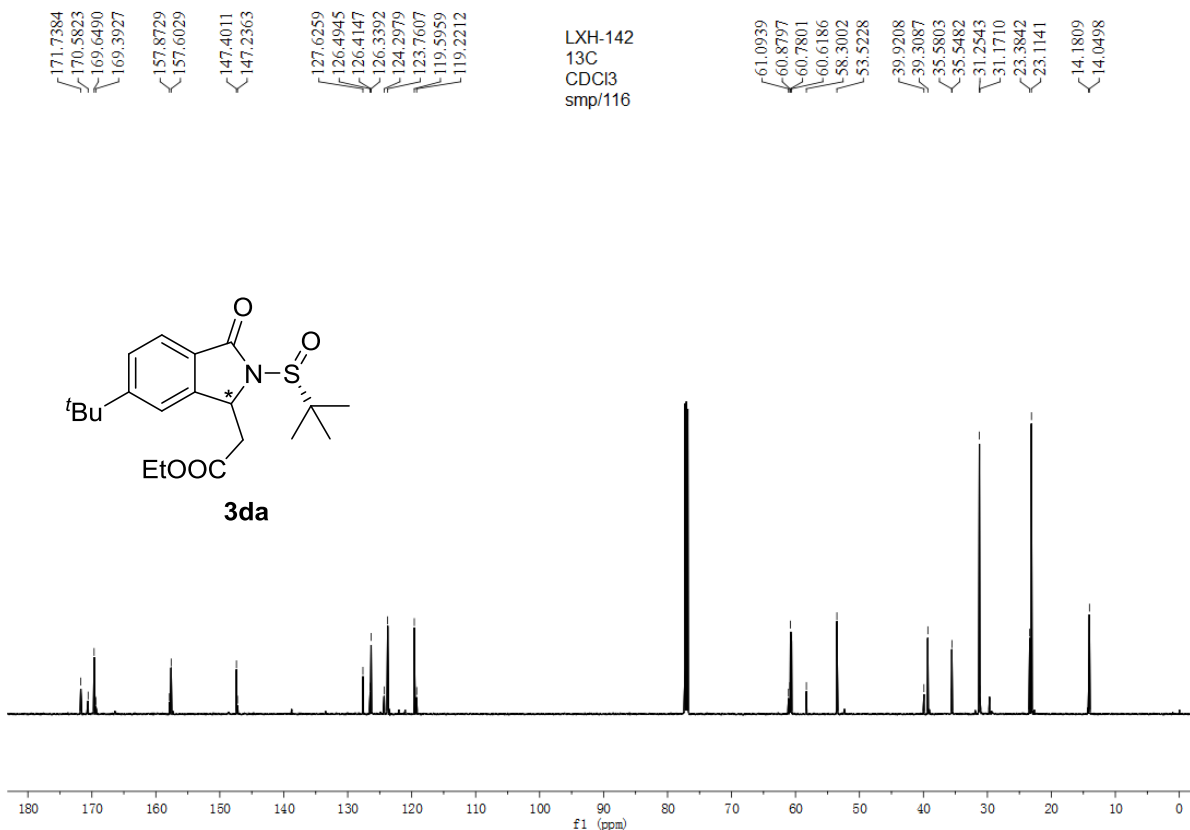

$^{13}\text{C}\{^1\text{H}\}$  NMR (150 MHz,  $\text{CDCl}_3$ ) of **3da**

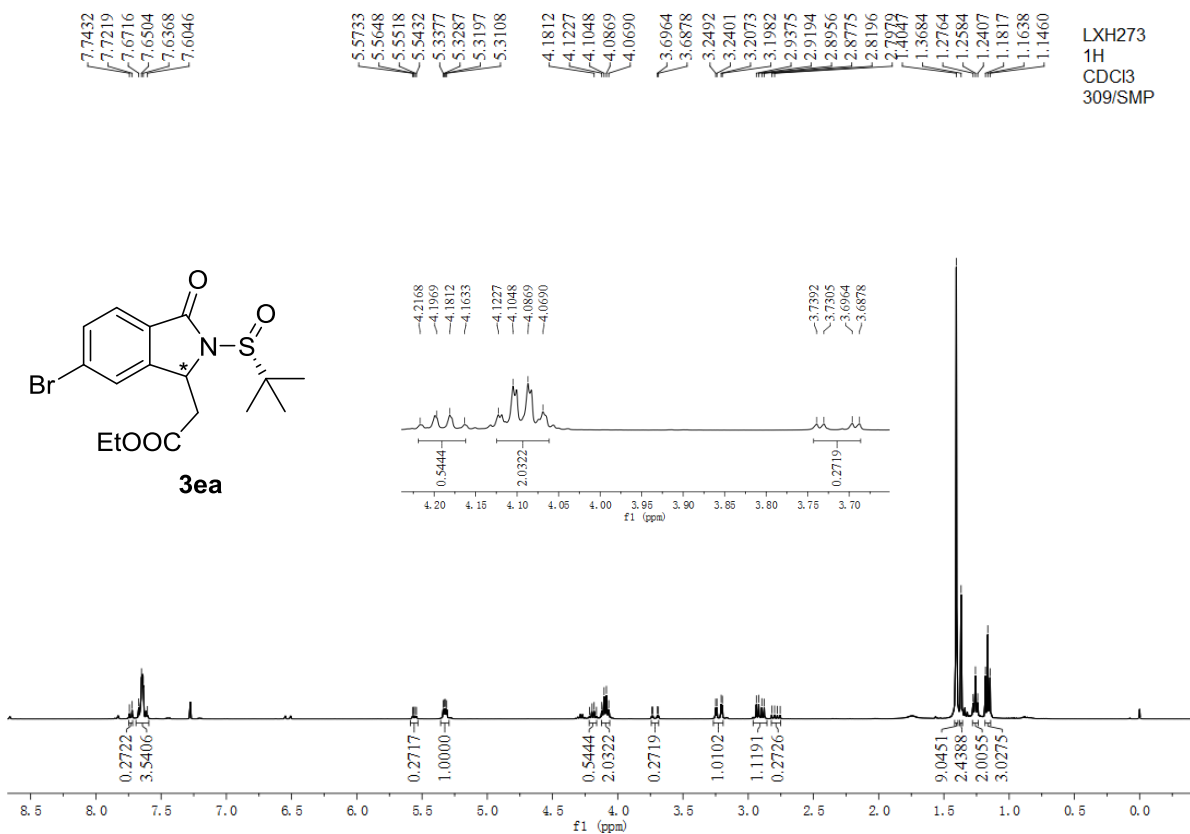

$^1\text{H}$  NMR (400 MHz,  $\text{CDCl}_3$ ) of **3ea**

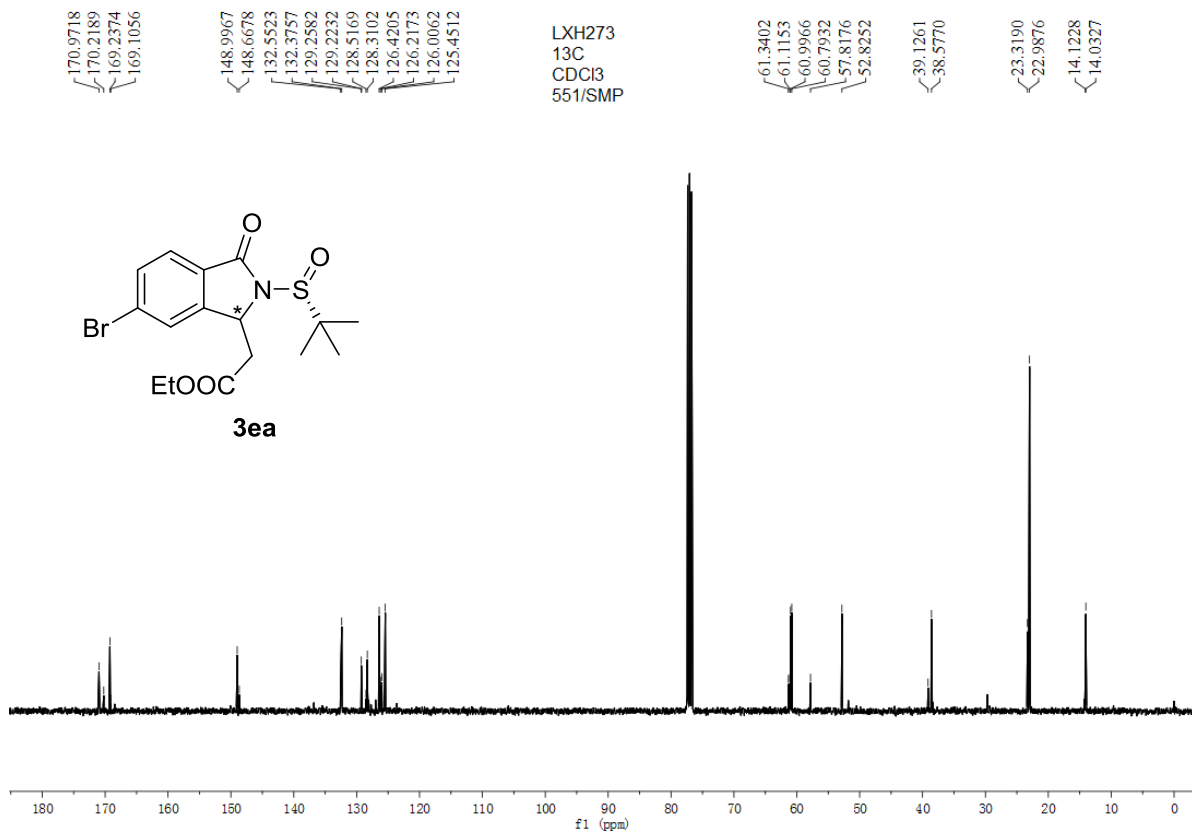

$^{13}\text{C}\{^1\text{H}\}$  NMR (100 MHz,  $\text{CDCl}_3$ ) of **3ea**

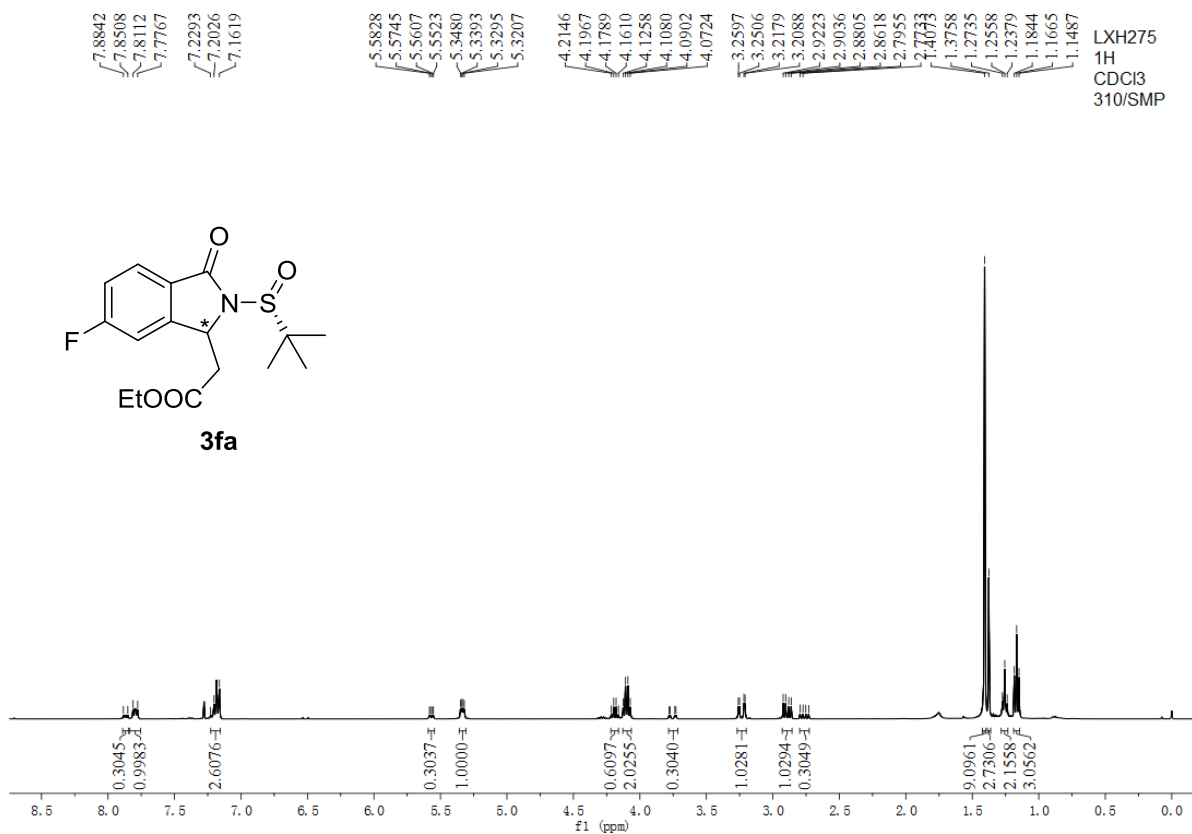

$^1\text{H}$  NMR (400 MHz,  $\text{CDCl}_3$ ) of **3fa**

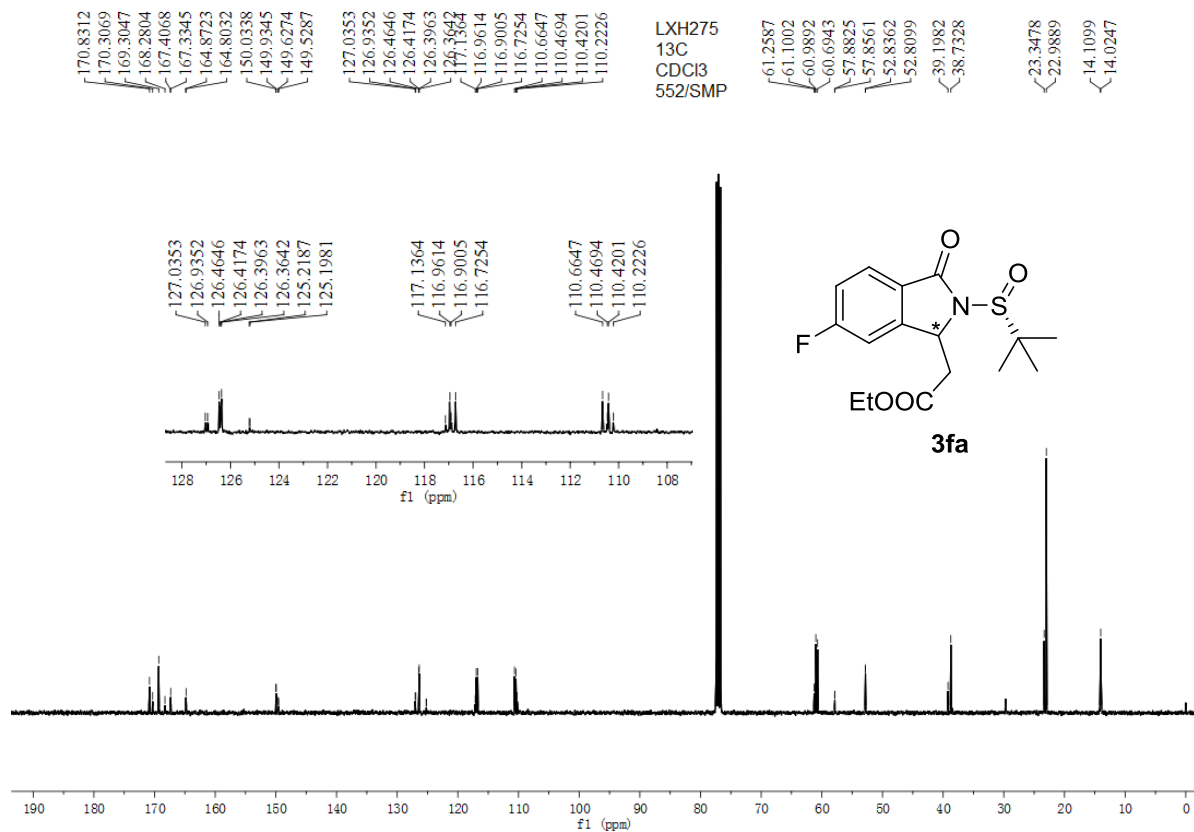

$^{13}\text{C}\{^1\text{H}\}$  NMR (100 MHz,  $\text{CDCl}_3$ ) of **3fa**

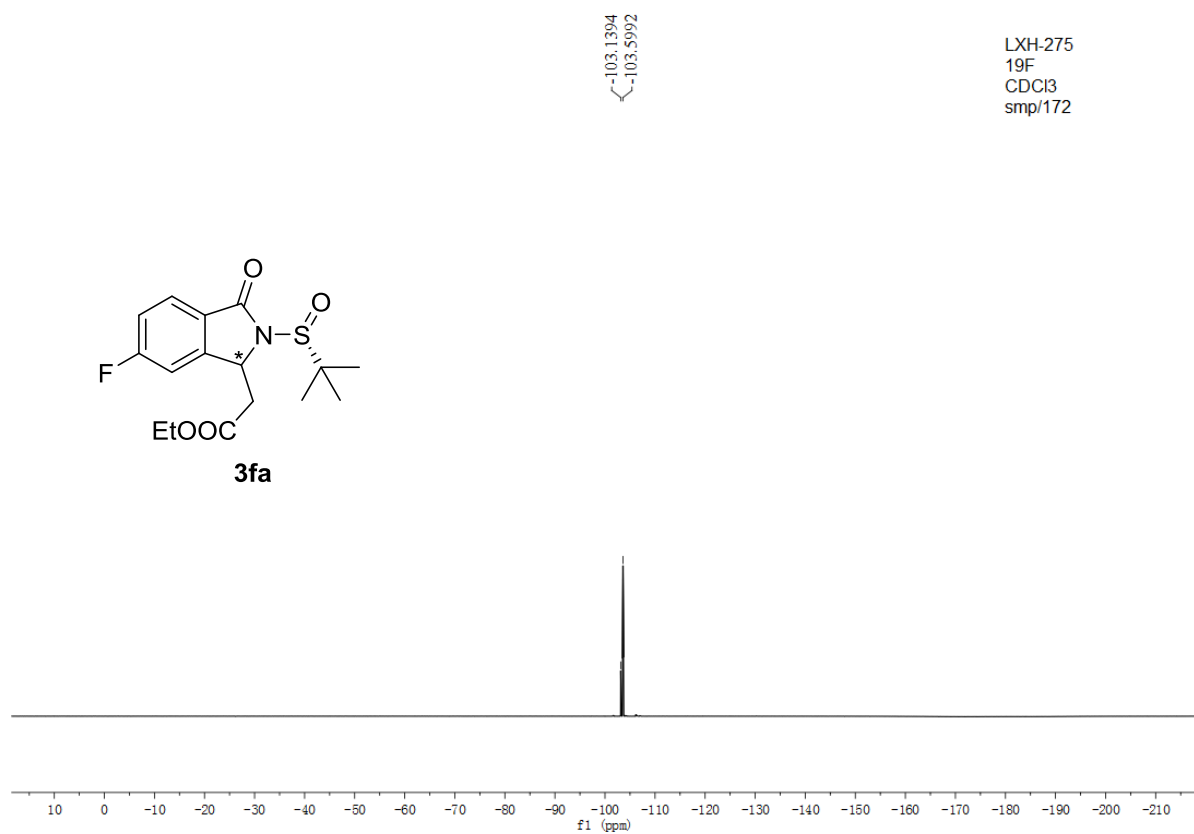

$^{19}\text{F}$  NMR (565 MHz,  $\text{CDCl}_3$ ) of **3fa**

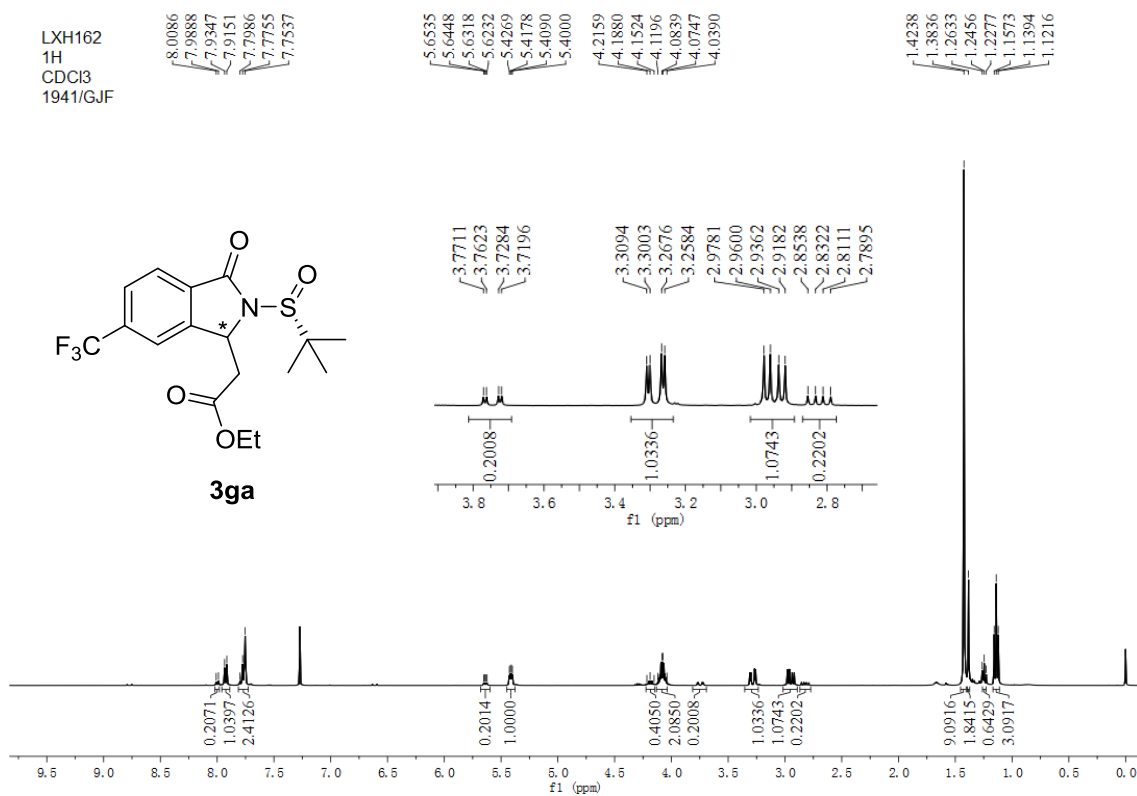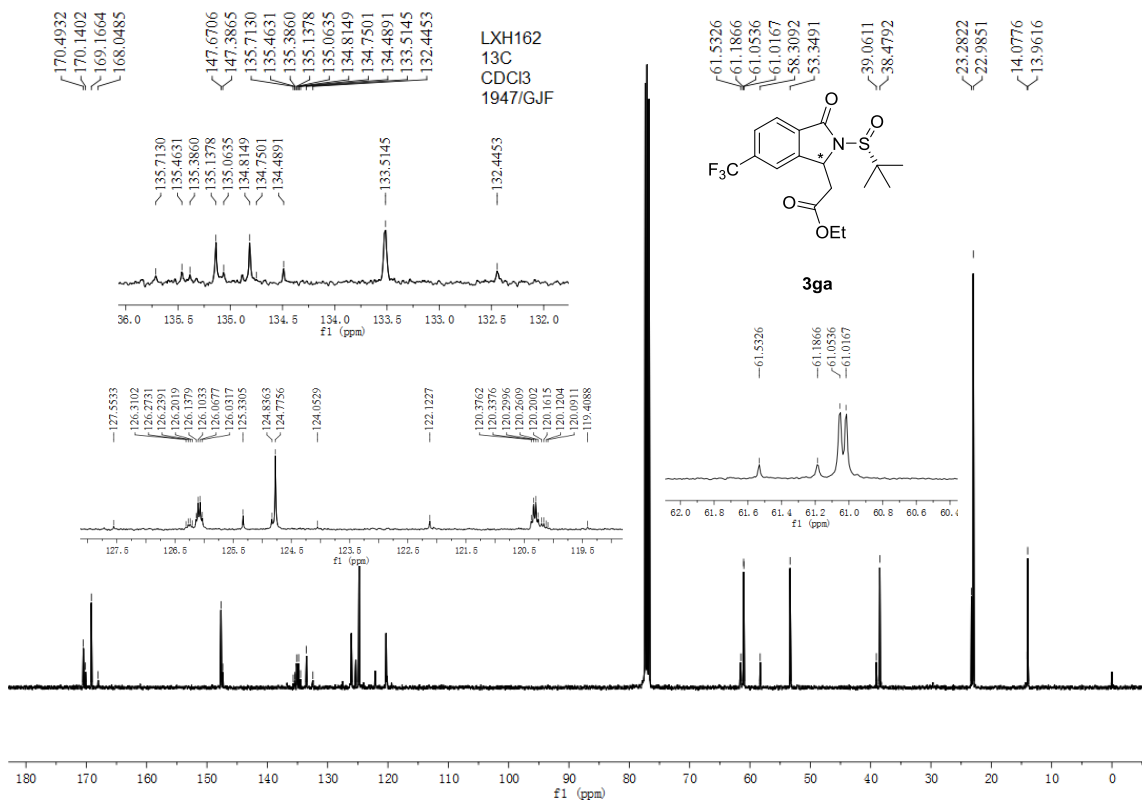

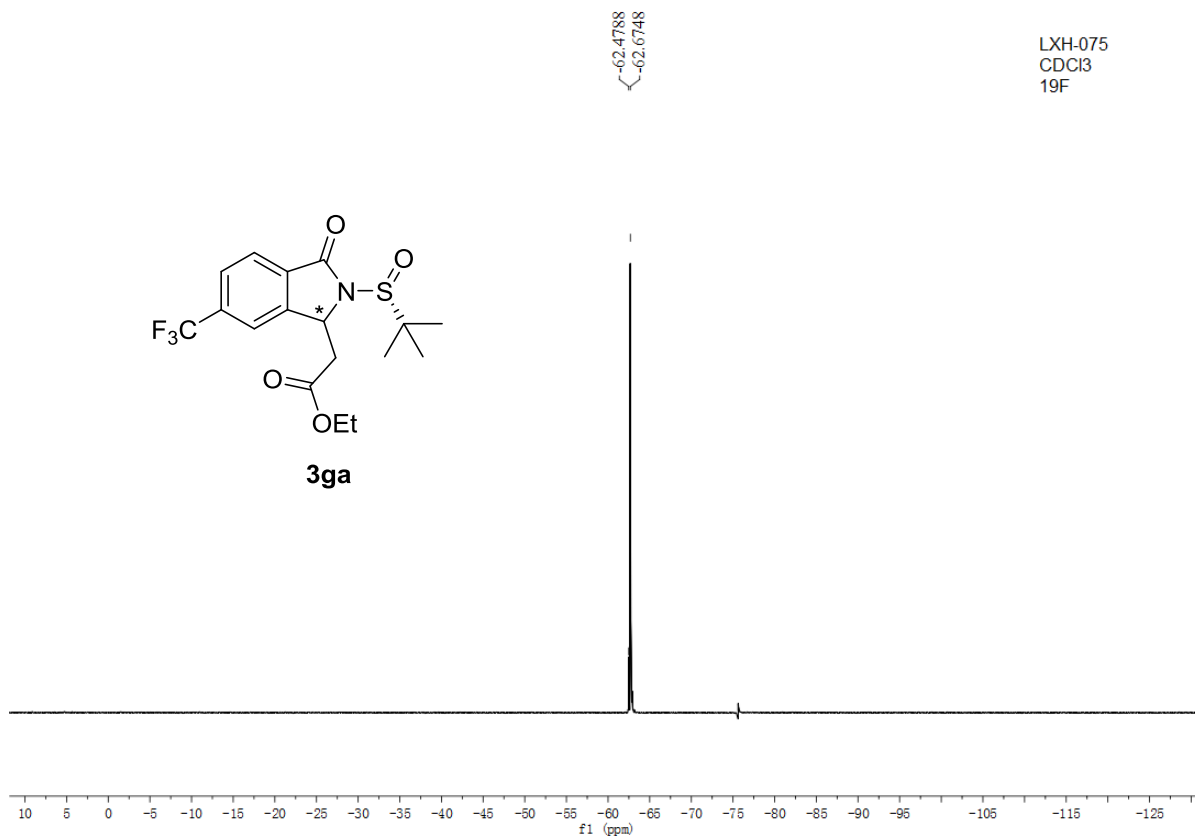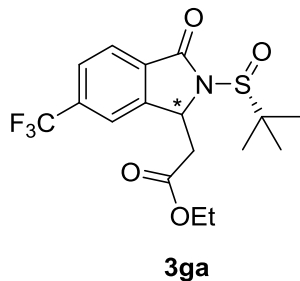

<sup>19</sup>F NMR (376 MHz, CDCl<sub>3</sub>) of **3ga**

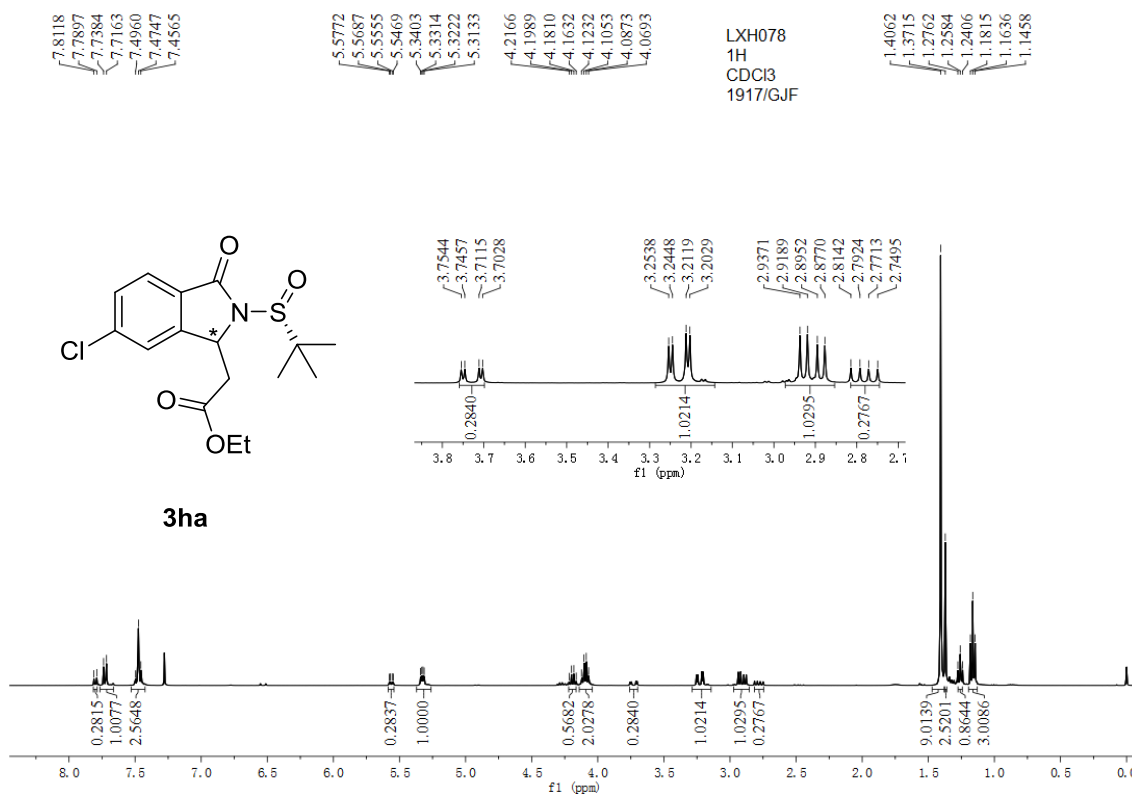

<sup>1</sup>H NMR (400 MHz, CDCl<sub>3</sub>) of **3ha**

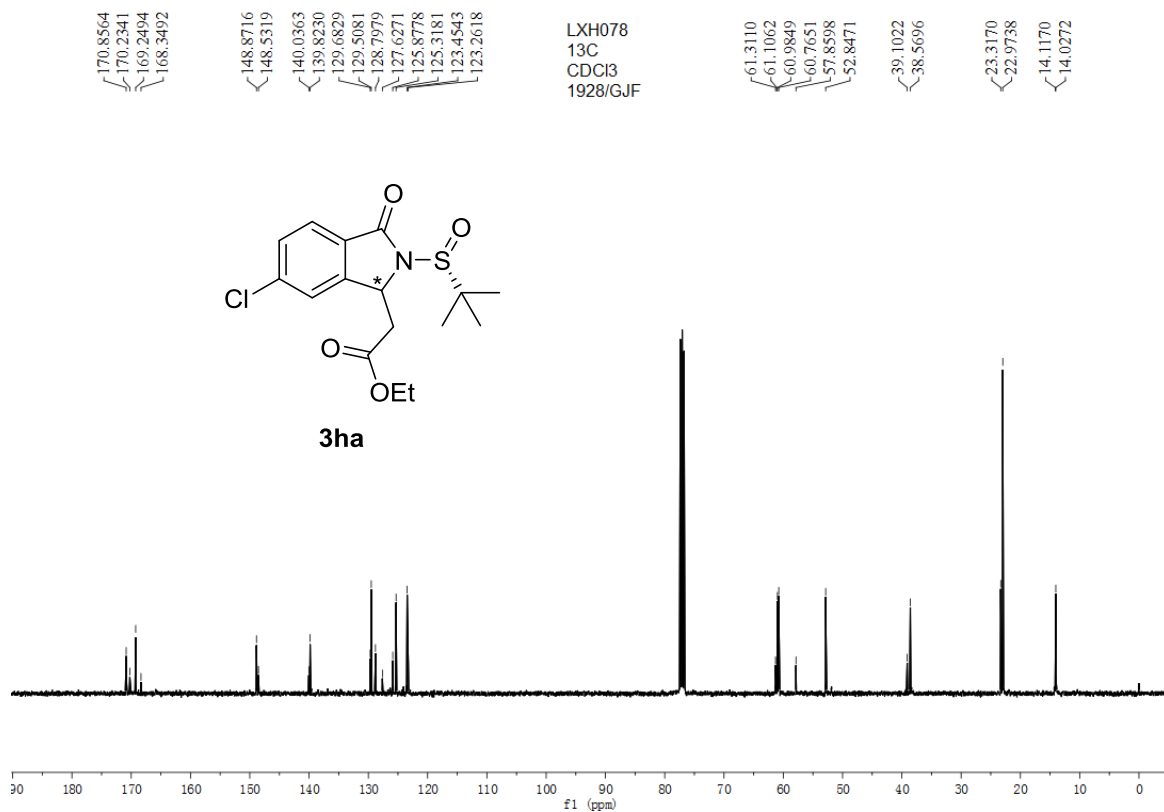

$^{13}\text{C}\{^1\text{H}\}$  NMR (100 MHz,  $\text{CDCl}_3$ ) of **3ha**

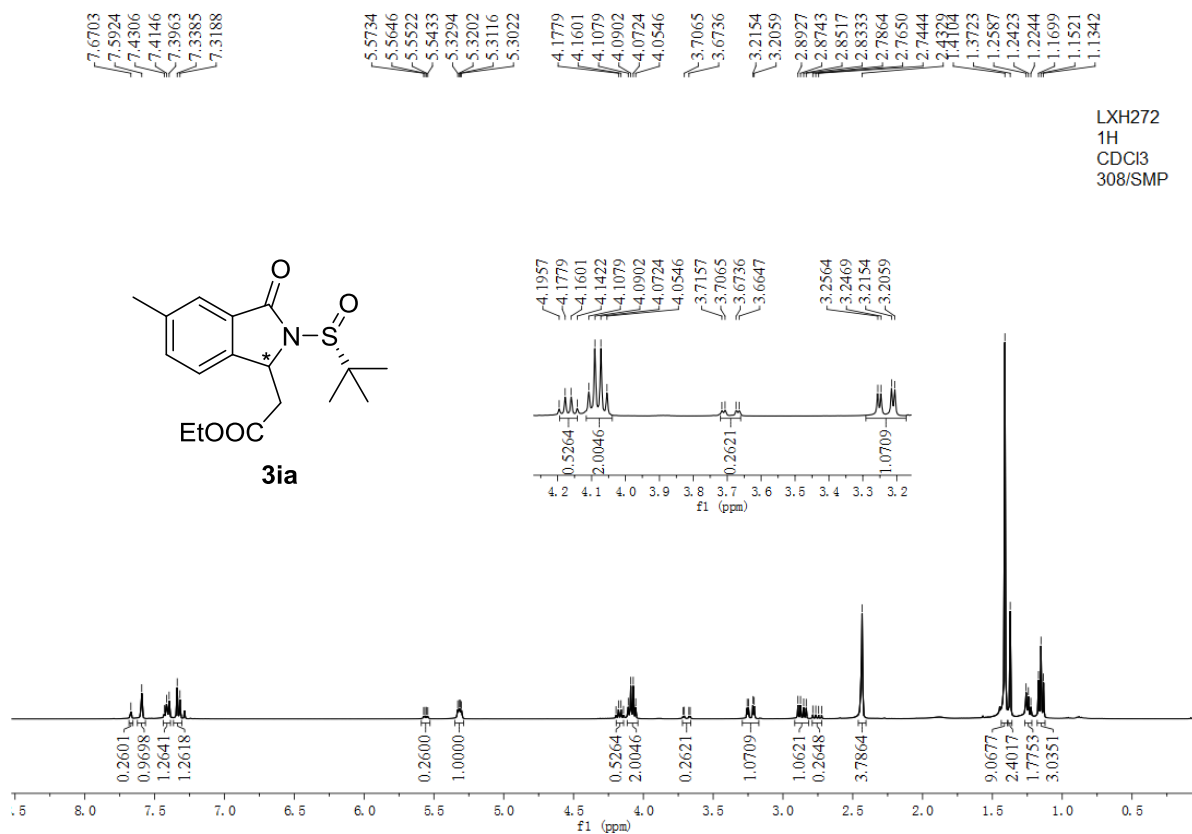

$^1\text{H}$  NMR (400 MHz,  $\text{CDCl}_3$ ) of **3ia**

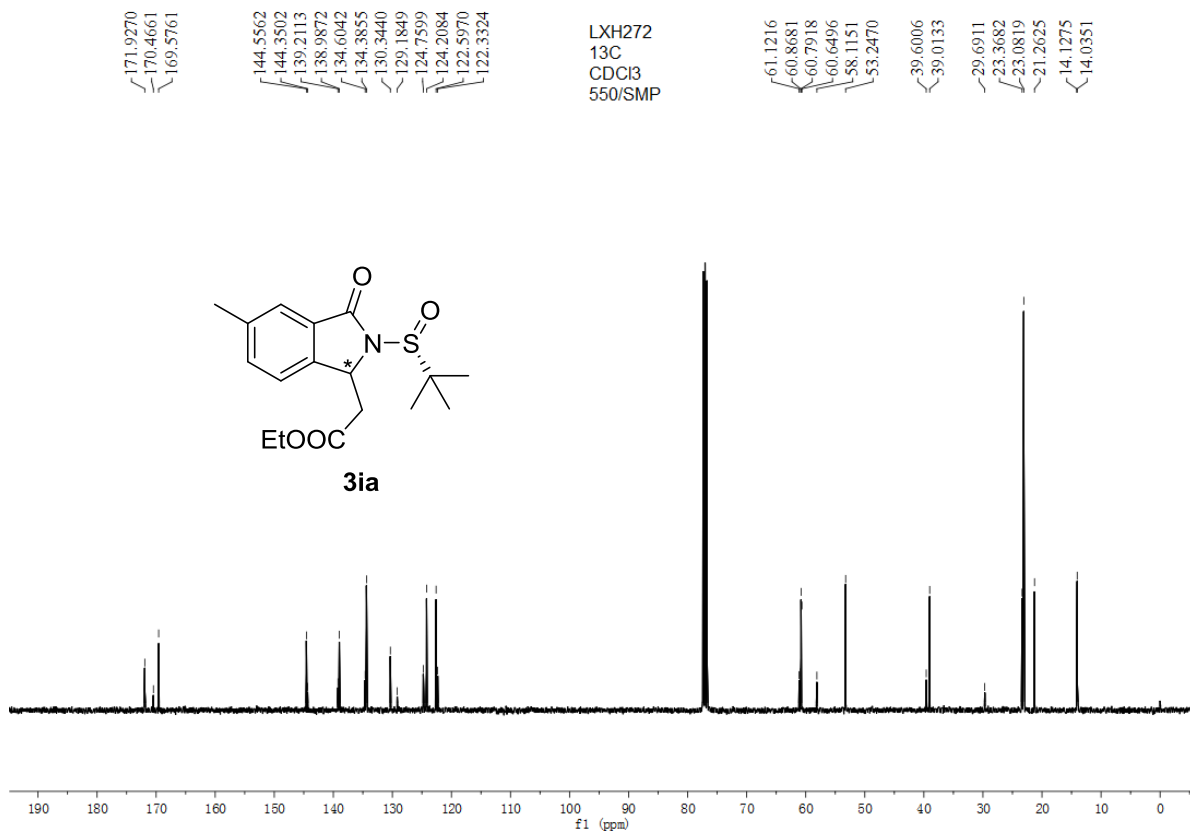

$^{13}\text{C}\{^1\text{H}\}$  NMR (100 MHz,  $\text{CDCl}_3$ ) of **3ia**

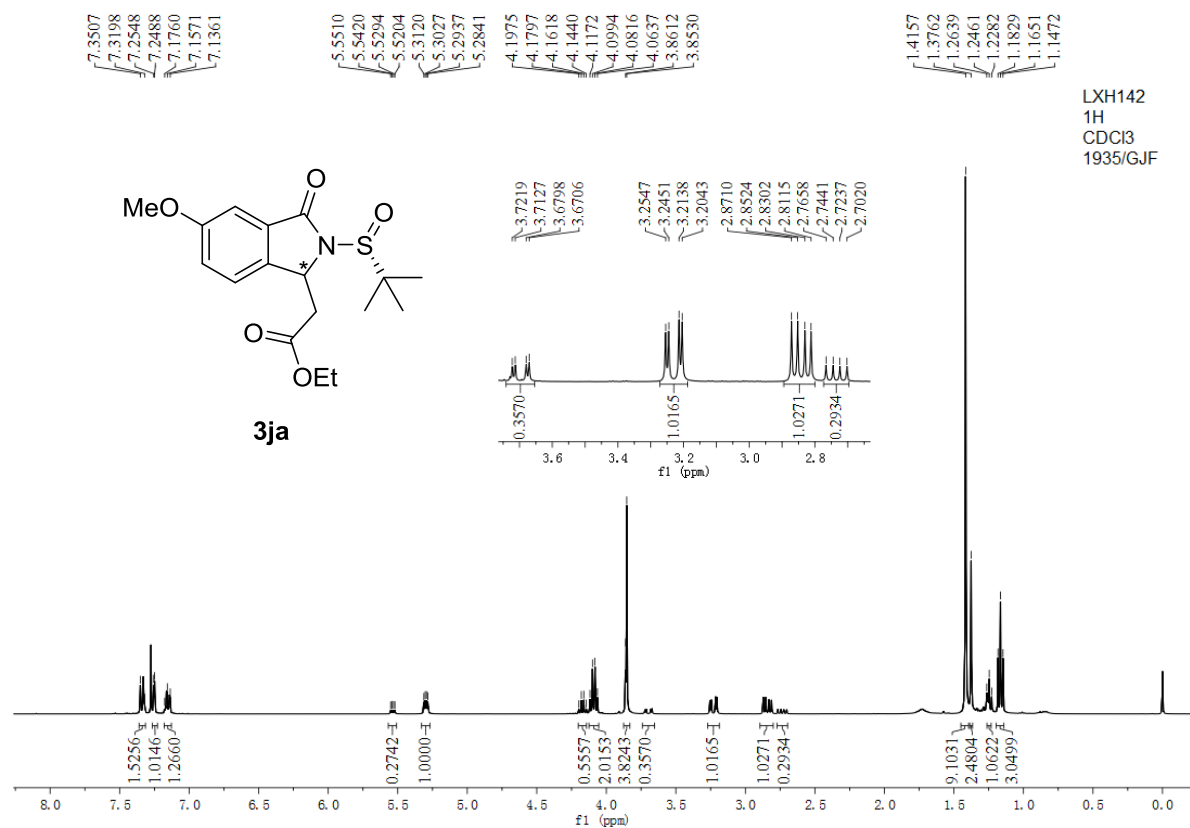

$^1\text{H}$  NMR (400 MHz,  $\text{CDCl}_3$ ) of **3ja**



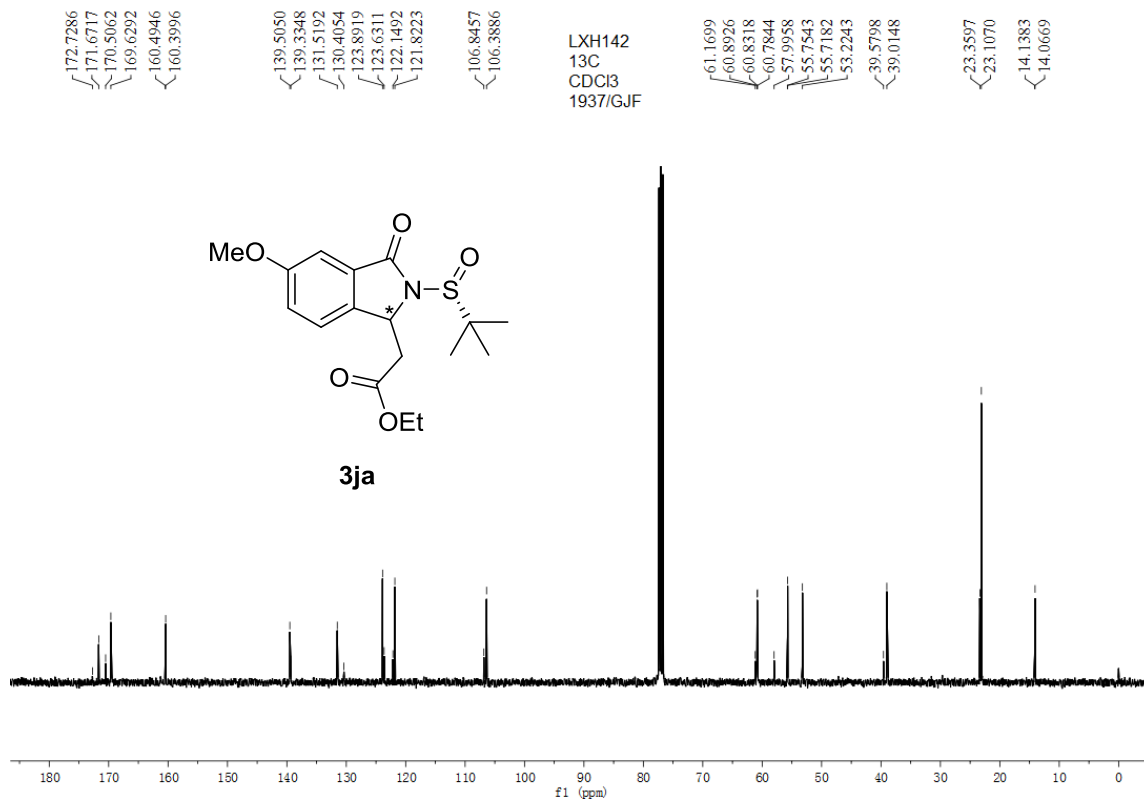

$^{13}\text{C}\{^1\text{H}\}$  NMR (100 MHz,  $\text{CDCl}_3$ ) of **3ja**

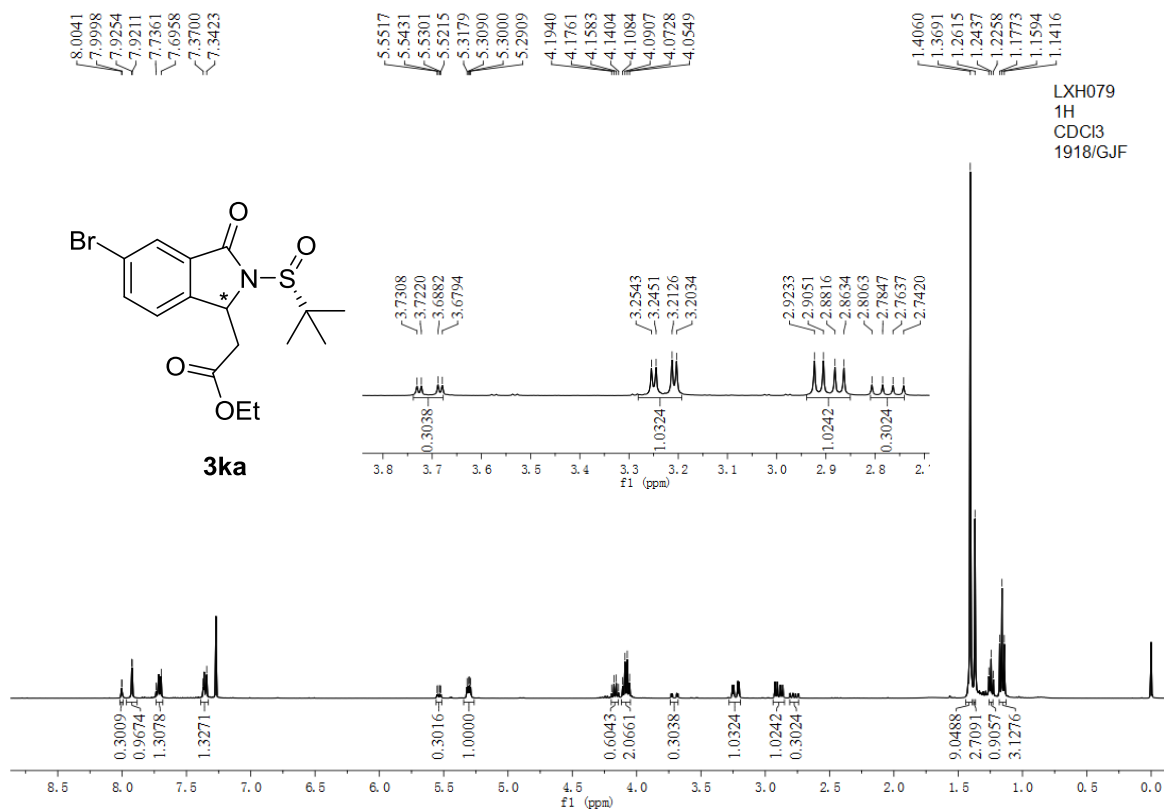

$^1\text{H}$  NMR (400 MHz,  $\text{CDCl}_3$ ) of **3ka**

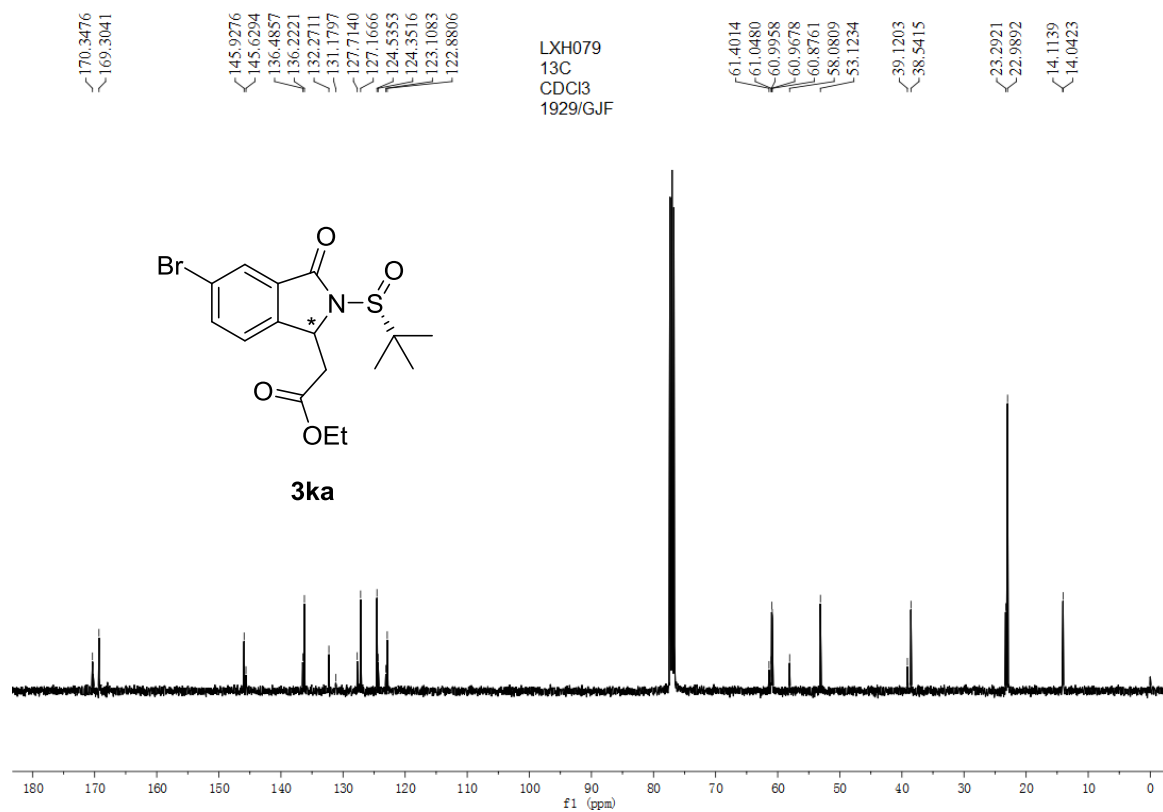

<sup>13</sup>C{<sup>1</sup>H} NMR (100 MHz, CDCl<sub>3</sub>) of **3ka**

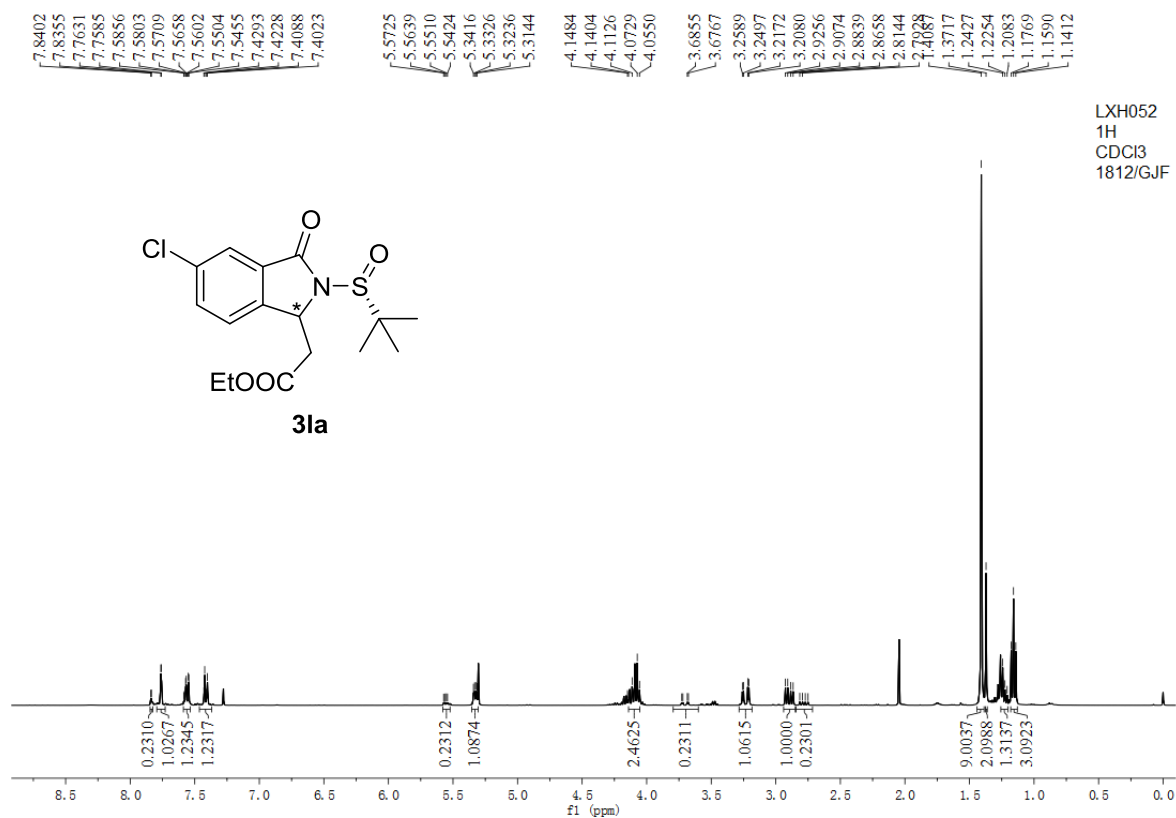

<sup>1</sup>H NMR (400 MHz, CDCl<sub>3</sub>) of **3la**

170.4801  
170.2409  
169.3133  
168.9158

145.4416  
145.1371  
135.3694  
135.1532  
133.6871  
133.4296  
132.0267  
130.9502  
124.6611  
124.2669  
124.1084  
124.0821

LXH052  
13C  
CDCl3  
1816/GJF

61.0355  
60.9531  
58.0477  
57.7521  
53.4418  
53.0864

39.1722  
38.6027

23.2956  
22.9918

14.1122  
14.0401

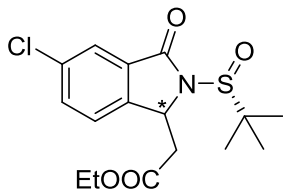

**3la**

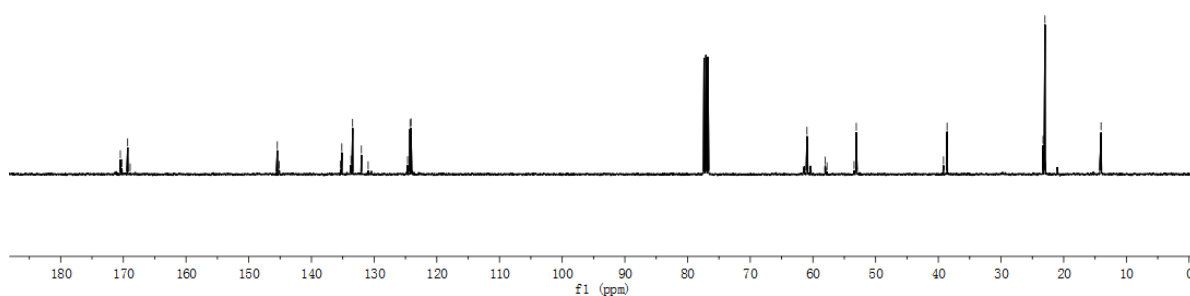

$^{13}\text{C}\{^1\text{H}\}$  NMR (100 MHz,  $\text{CDCl}_3$ ) of **3la**

7.6026  
7.5831  
7.5629  
7.5508  
7.2457  
7.2265  
7.1612  
7.1383  
7.1169  
7.0948

5.5839  
5.5751  
5.5630  
5.5543  
5.3635  
5.3546  
5.3462  
5.3372  
4.1968  
4.1790  
4.1611  
4.1433  
4.1011  
4.0832  
4.0630  
4.0473

1.6398  
1.4079  
1.3810  
1.2618  
1.2440  
1.2261  
1.1661  
1.1482  
1.1304

LXH074  
1H  
CDCl3  
1913/GJF

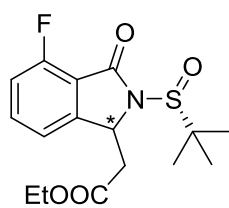

**3ma**

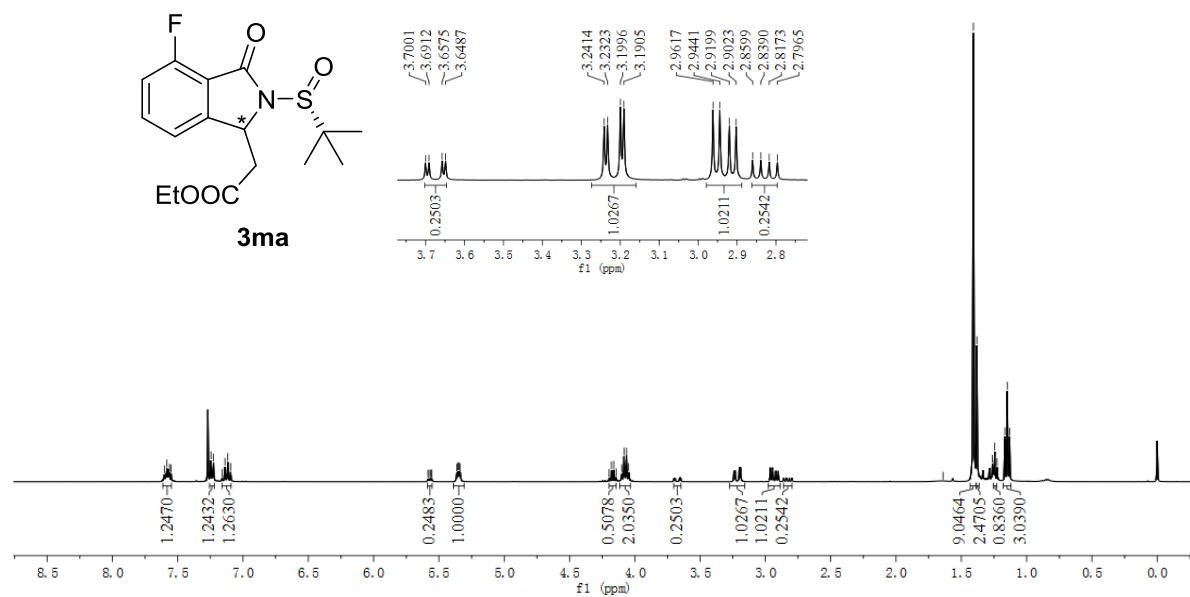

$^1\text{H}$  NMR (400 MHz,  $\text{CDCl}_3$ ) of **3ma**

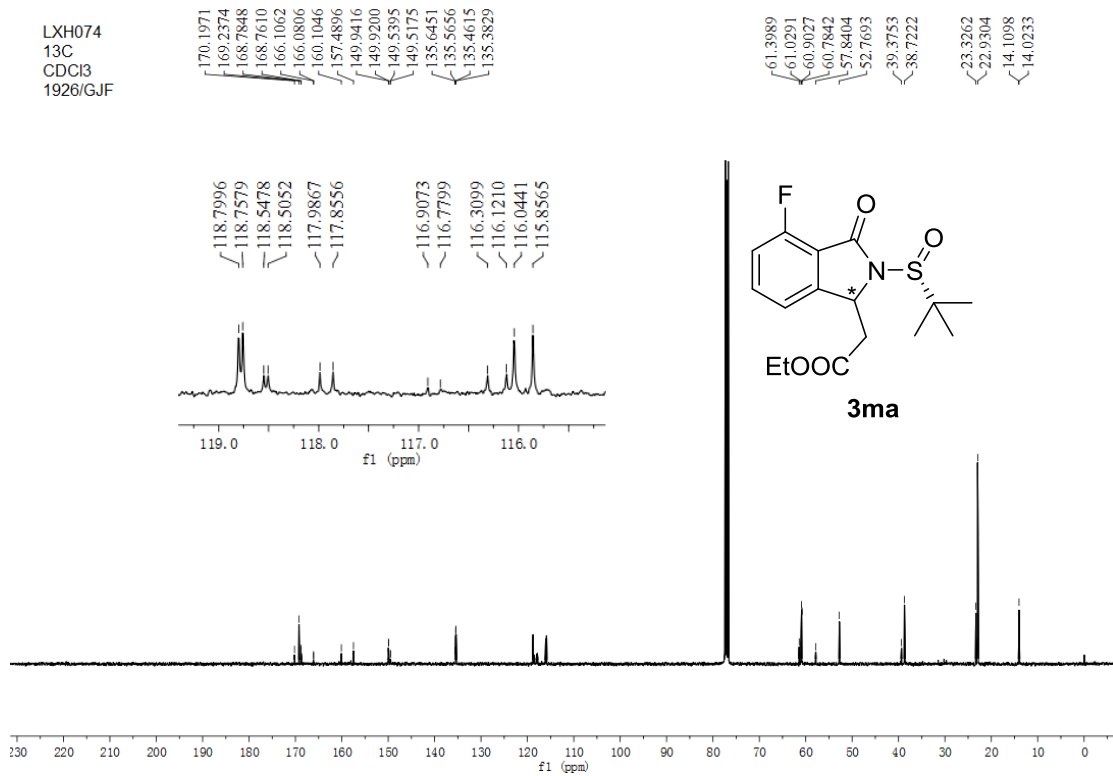

$^{13}\text{C}\{^1\text{H}\}$  NMR (100 MHz,  $\text{CDCl}_3$ ) of **3ma**

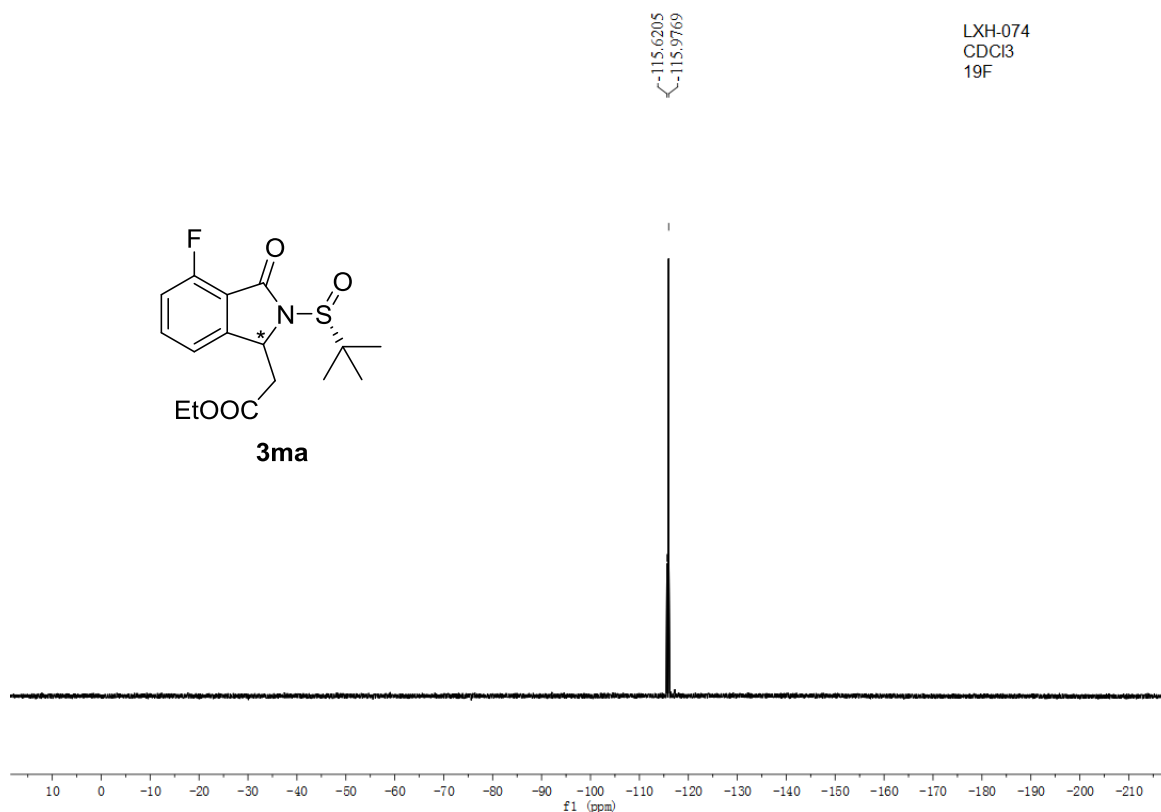

$^{19}\text{F}$  NMR (376 MHz,  $\text{CDCl}_3$ ) of **3ma**

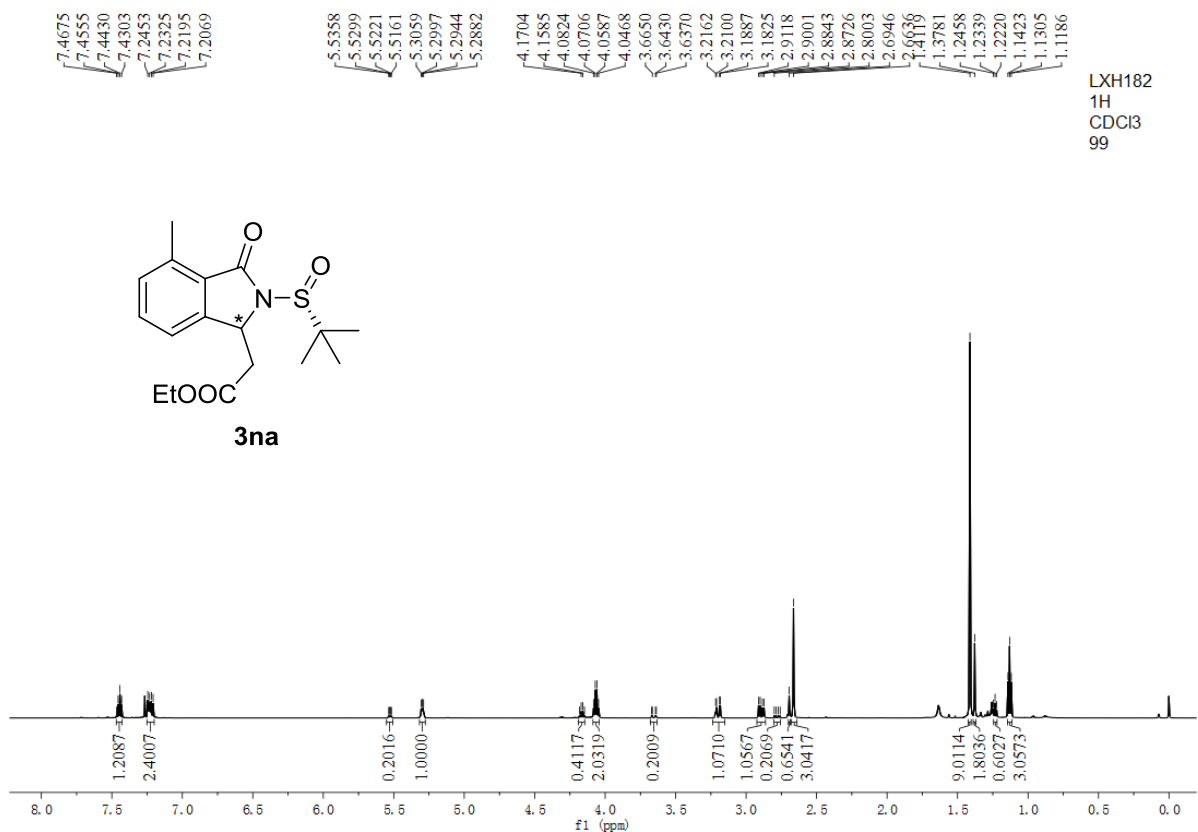

<sup>1</sup>H NMR (600 MHz, CDCl<sub>3</sub>) of **3na**

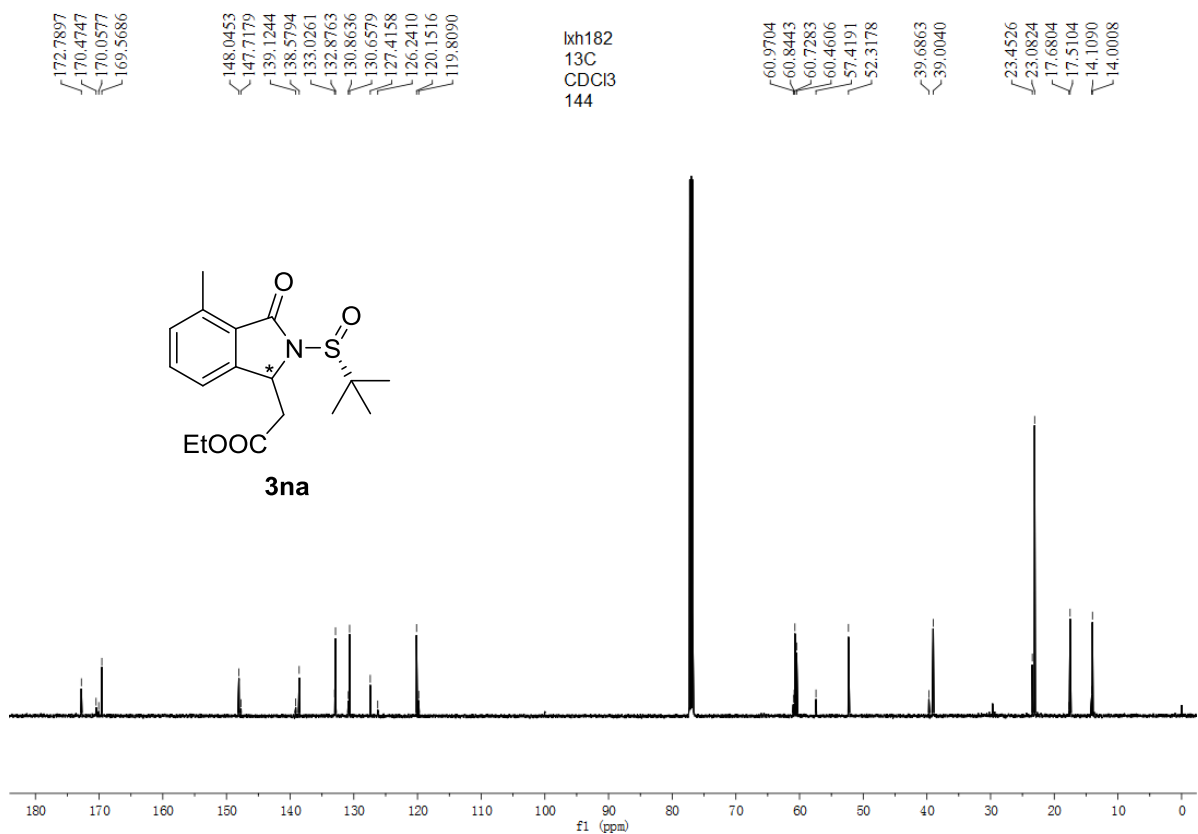

<sup>13</sup>C {<sup>1</sup>H} NMR (150 MHz, CDCl<sub>3</sub>) of **3na**

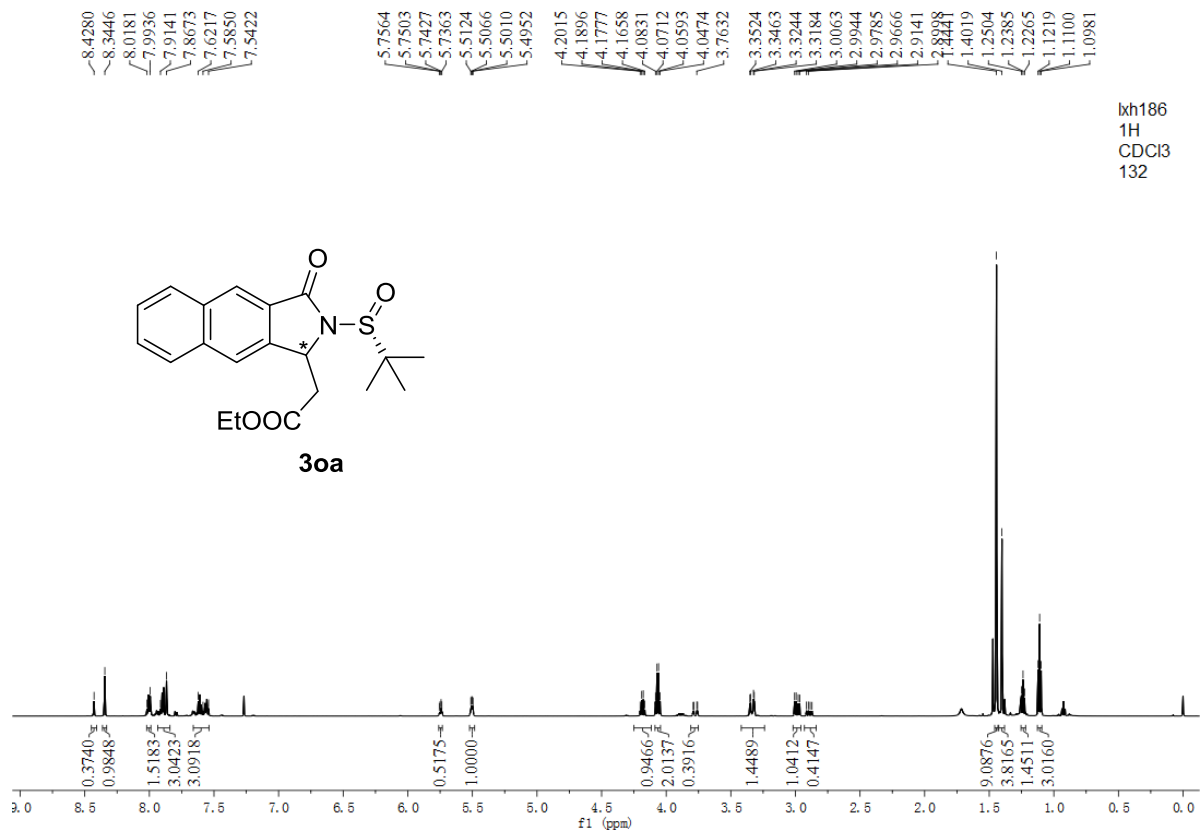

kh186  
 1H  
 CDCl<sub>3</sub>  
 132

<sup>1</sup>H NMR (600 MHz, CDCl<sub>3</sub>) of **3a**

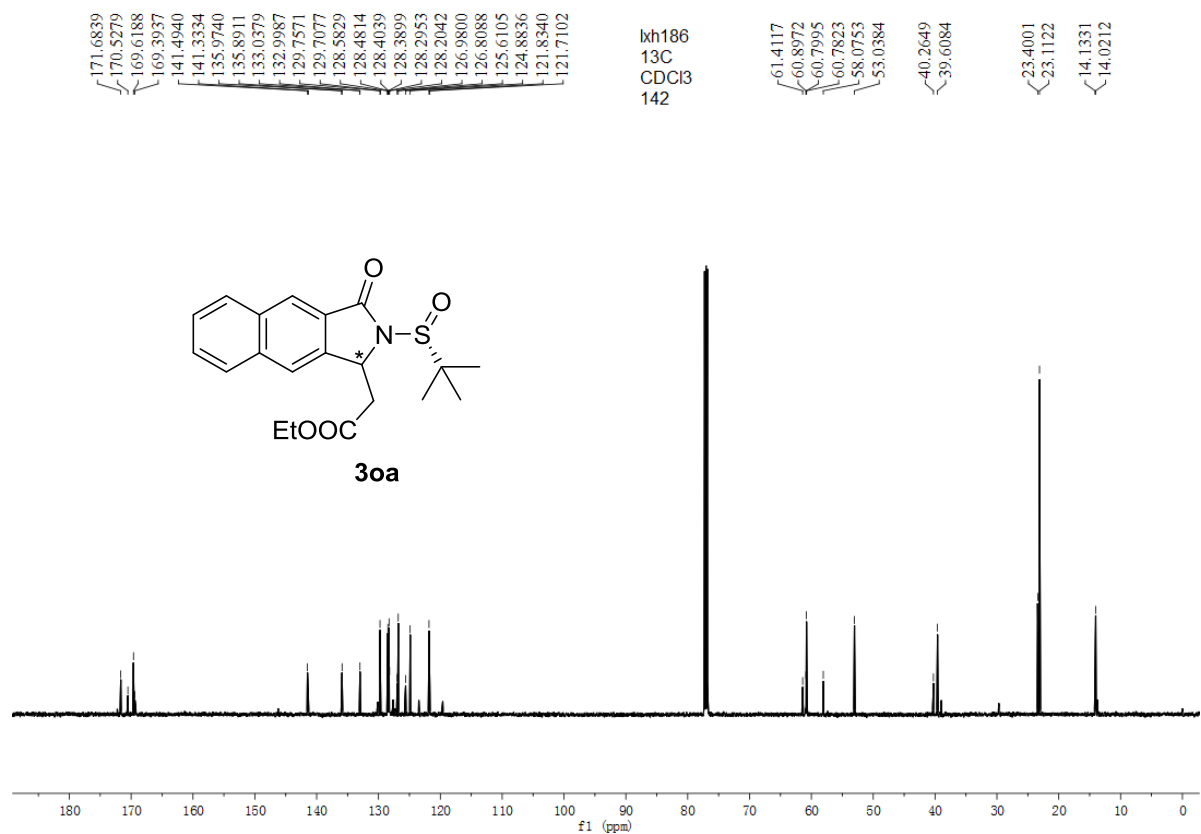

kh186  
 13C  
 CDCl<sub>3</sub>  
 142

<sup>13</sup>C{<sup>1</sup>H} NMR (150 MHz, CDCl<sub>3</sub>) of **3a**

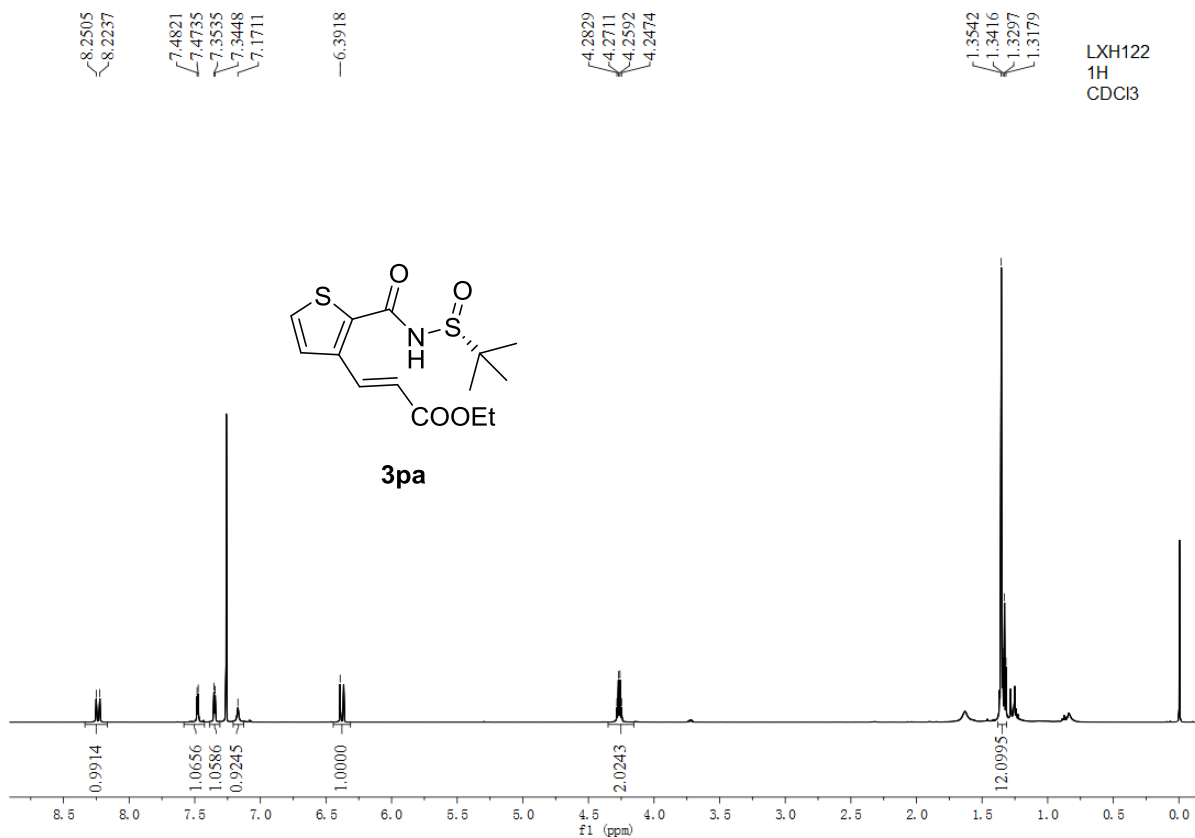

<sup>1</sup>H NMR (600 MHz, CDCl<sub>3</sub>) of **3pa**

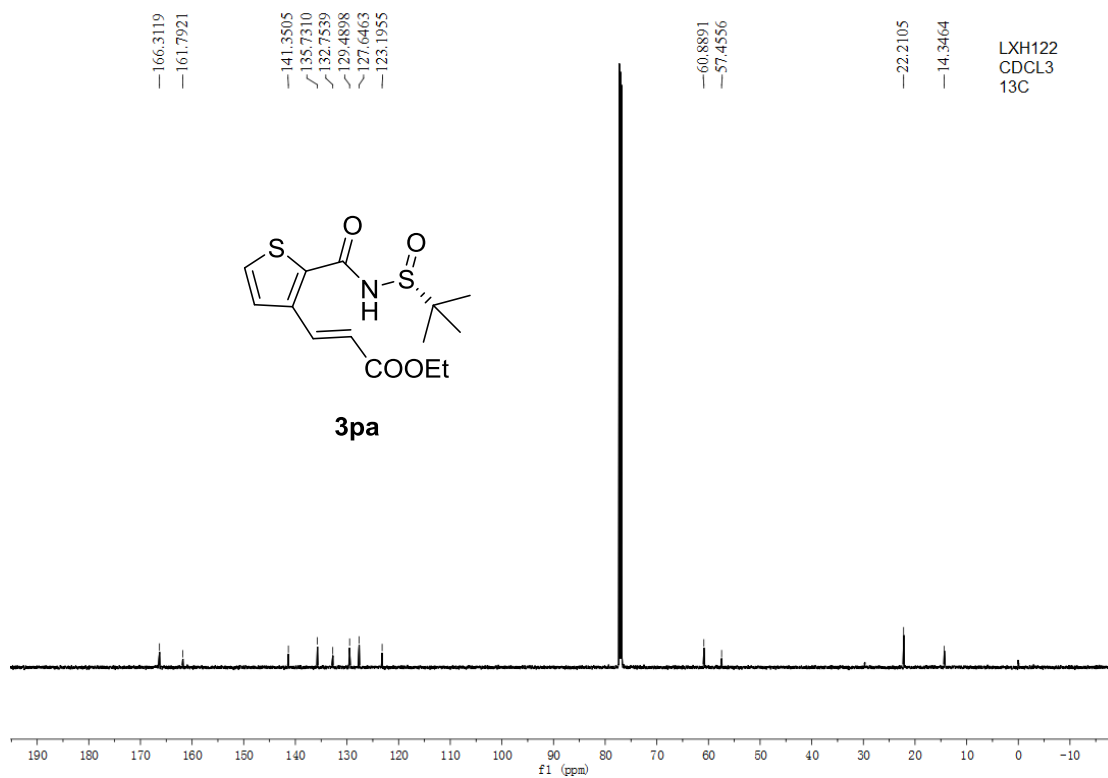

<sup>13</sup>C{<sup>1</sup>H} NMR (150 MHz, CDCl<sub>3</sub>) of **3pa**

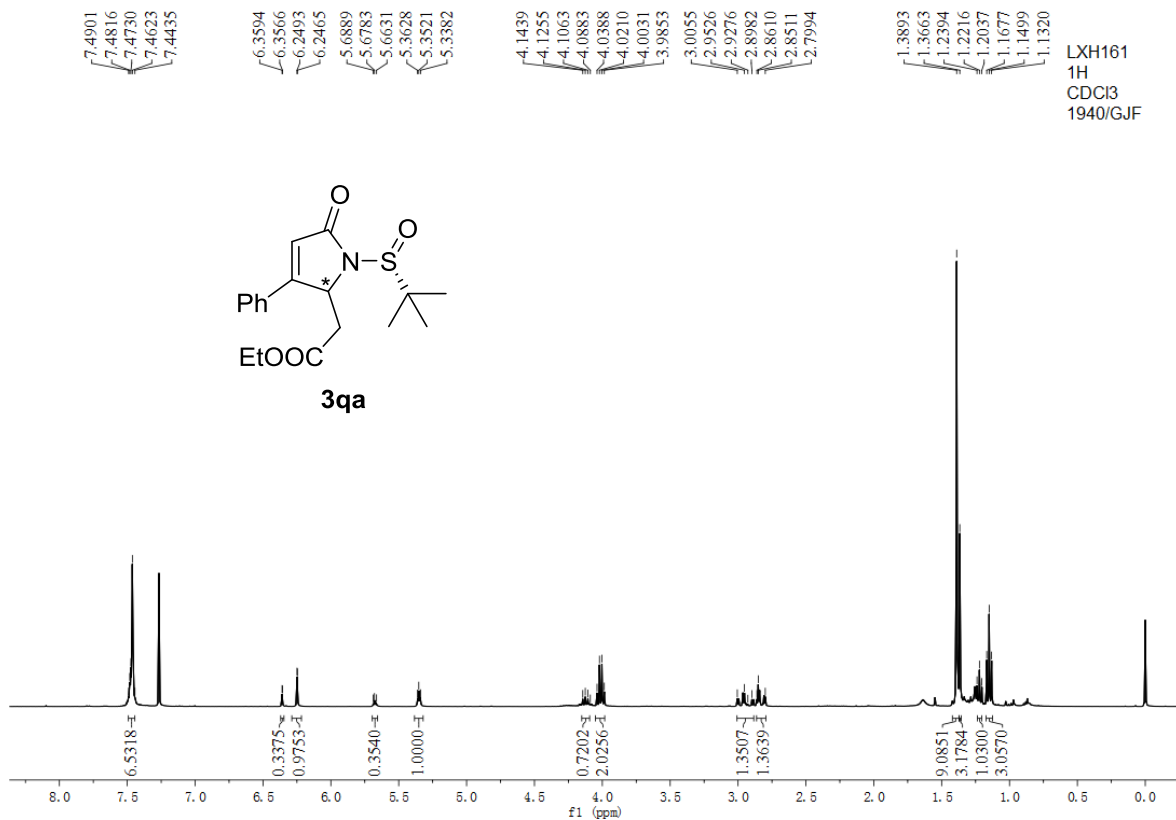

$^1\text{H}$  NMR (400 MHz,  $\text{CDCl}_3$ ) of **3qa**

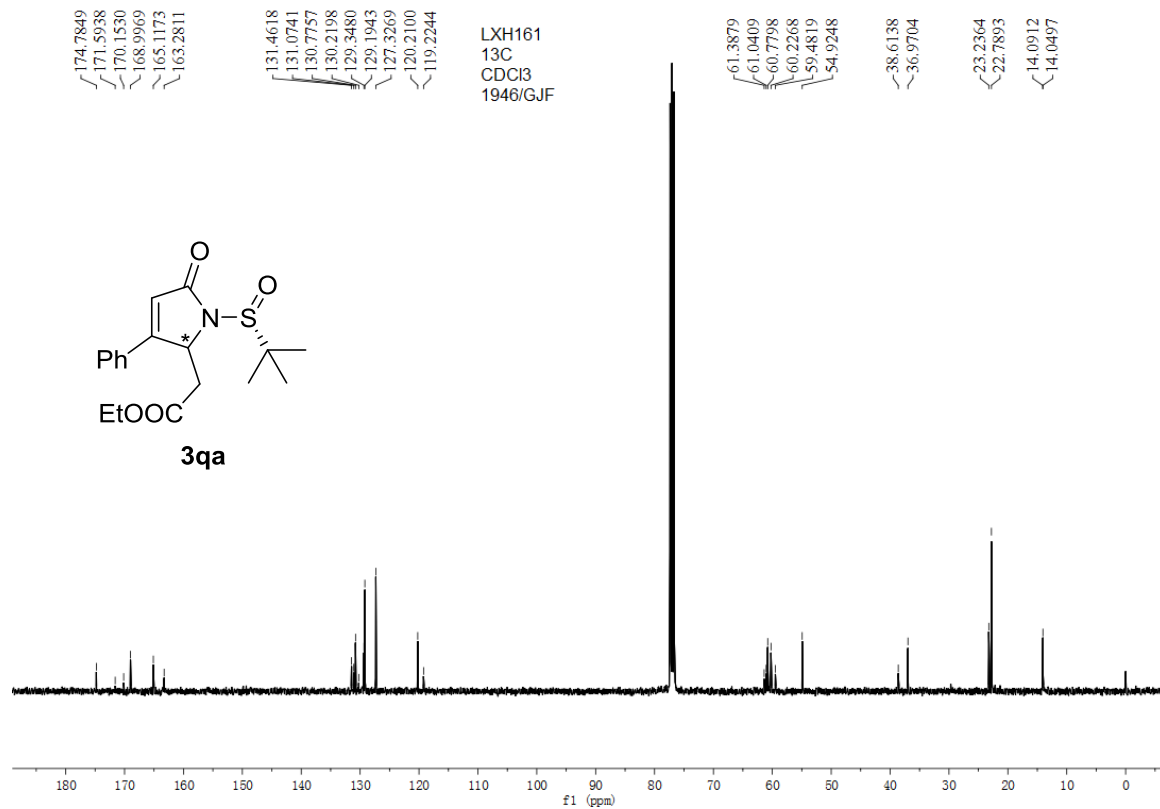

$^{13}\text{C}\{^1\text{H}\}$  NMR (100 MHz,  $\text{CDCl}_3$ ) of **3qa**



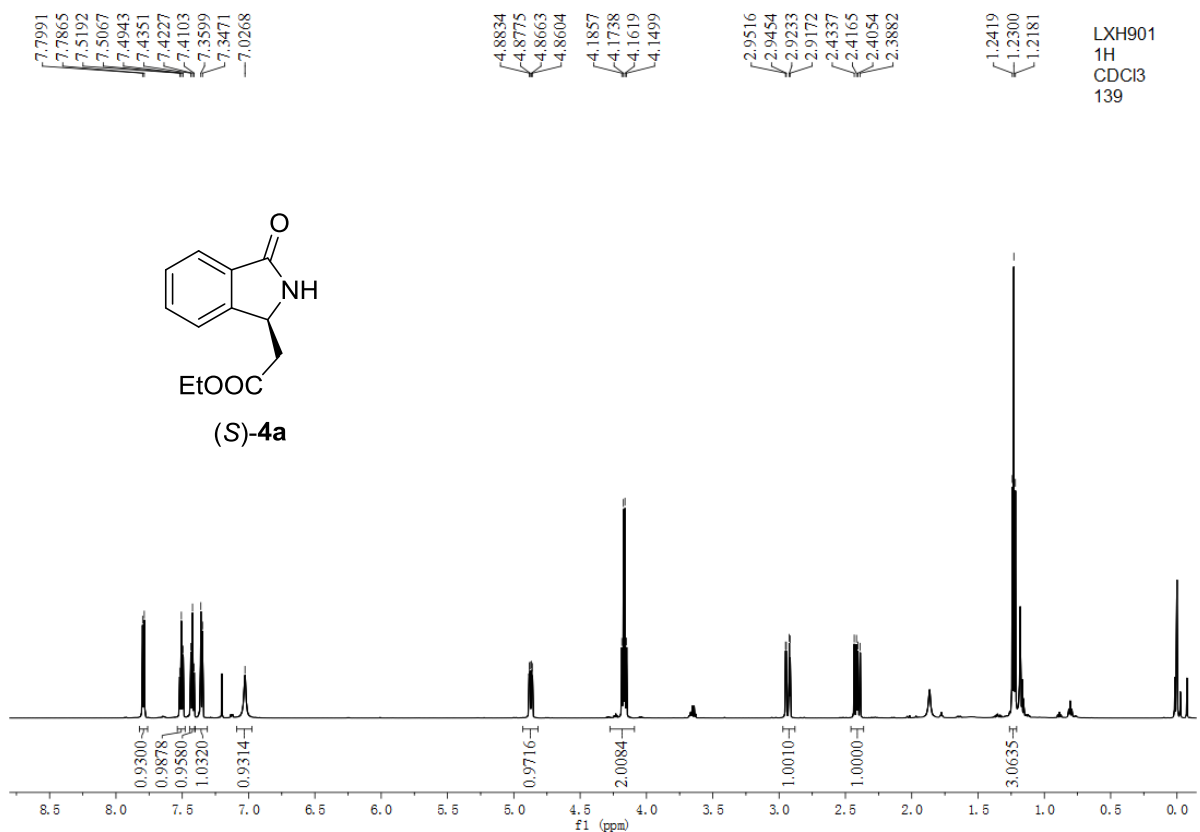

<sup>1</sup>H NMR (600 MHz, CDCl<sub>3</sub>) of (S)-4a

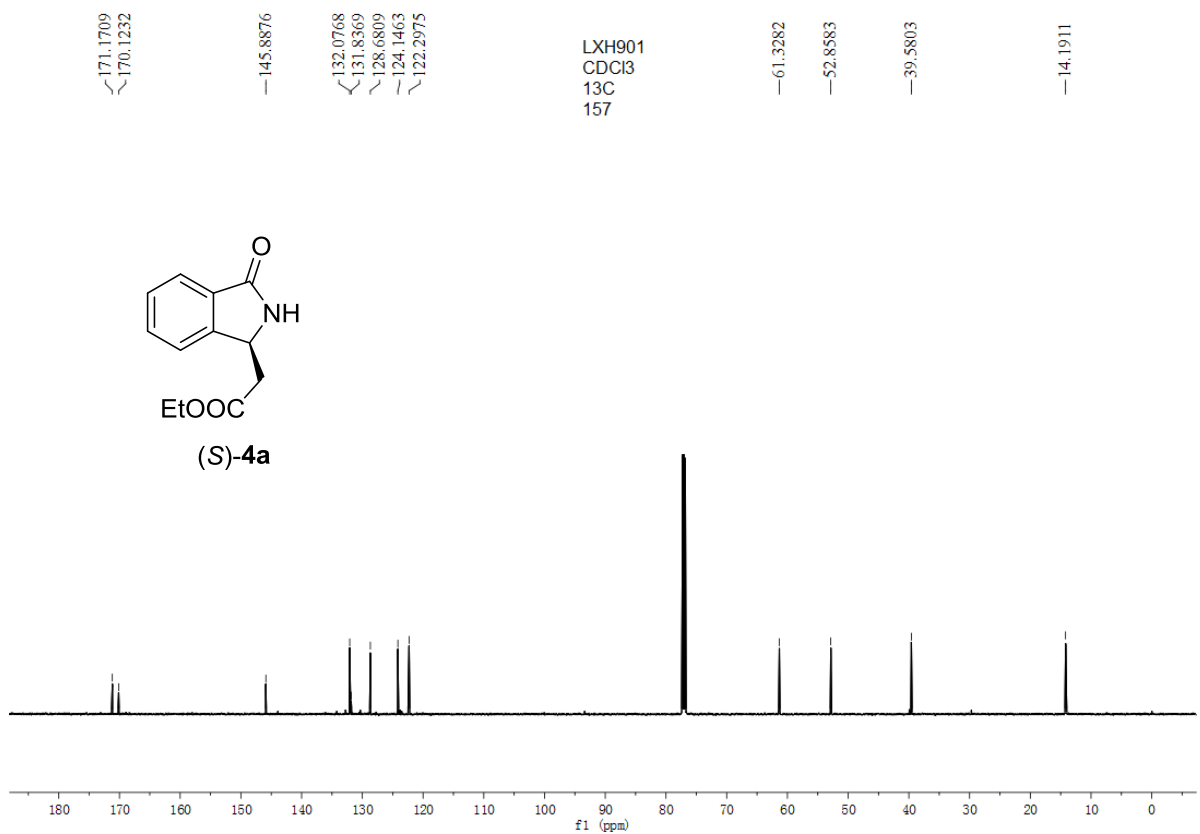

<sup>13</sup>C {<sup>1</sup>H} NMR (150 MHz, CDCl<sub>3</sub>) of (S)-4a

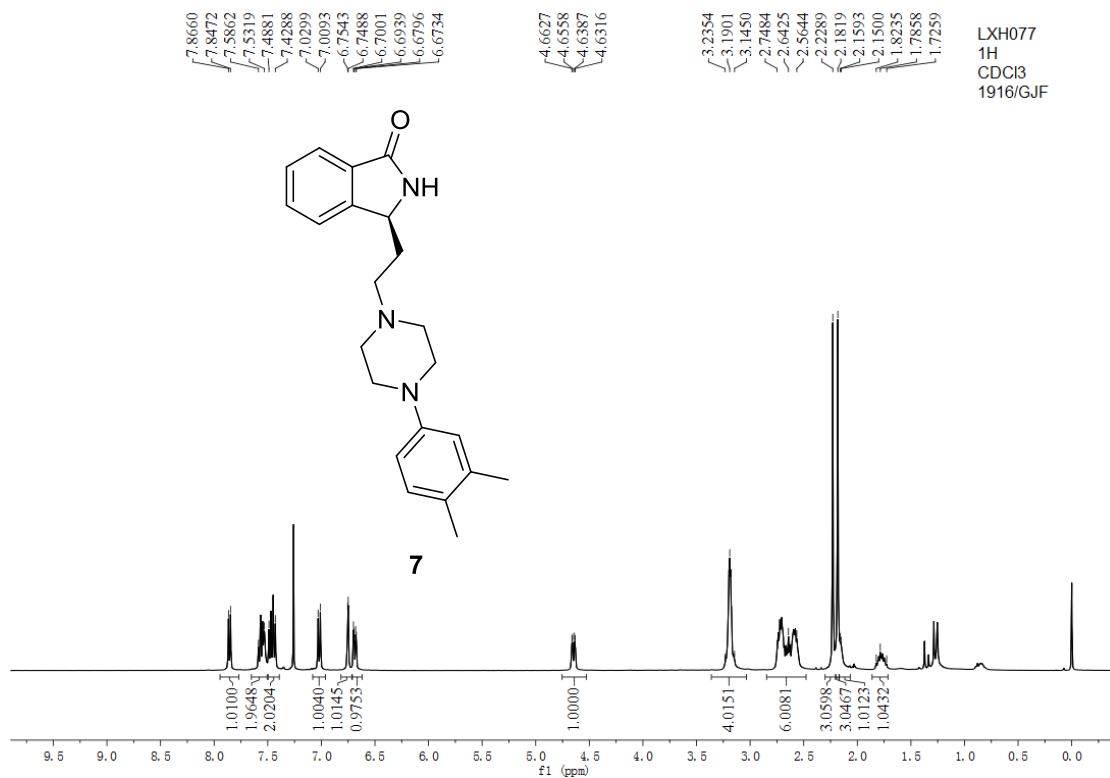

LXH077  
1H  
CDCl3  
1916/GJF

<sup>1</sup>H NMR (400 MHz, CDCl<sub>3</sub>) of 7

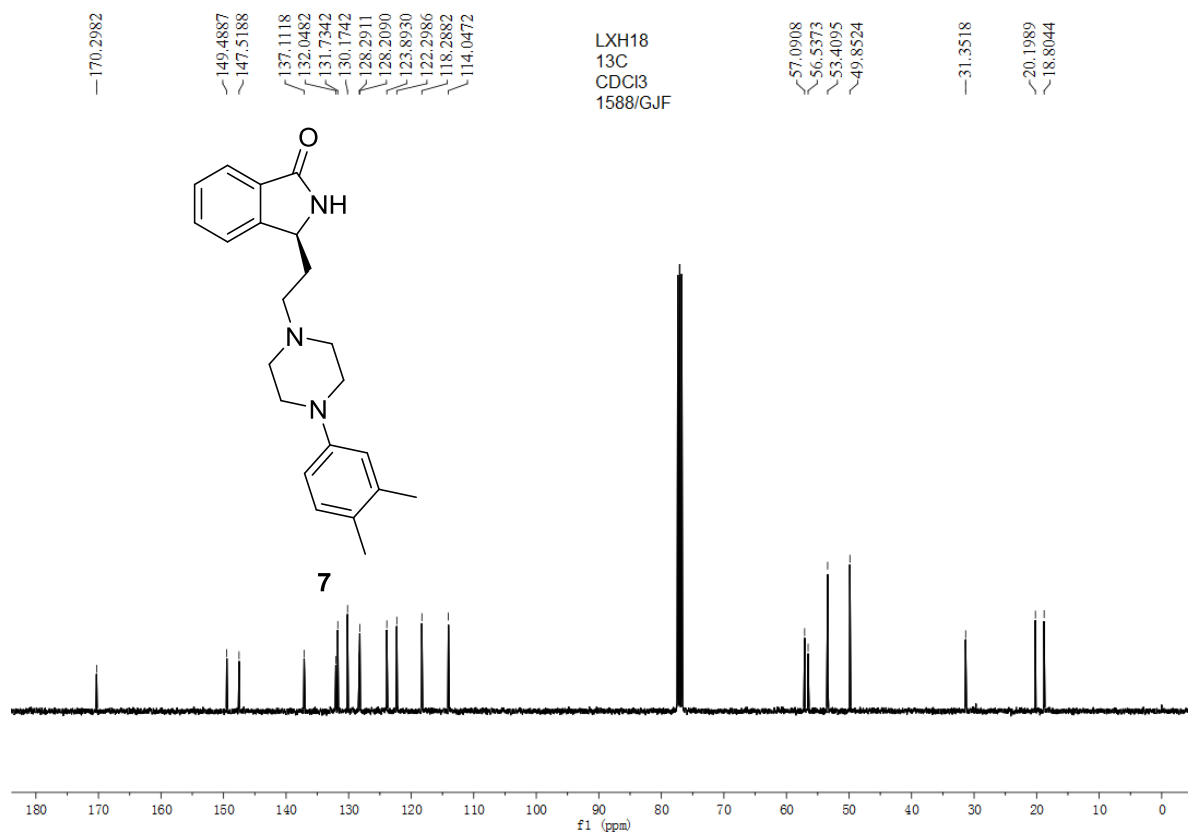

LXH18  
13C  
CDCl3  
1588/GJF

<sup>13</sup>C{<sup>1</sup>H} NMR (100 MHz, CDCl<sub>3</sub>) of 7

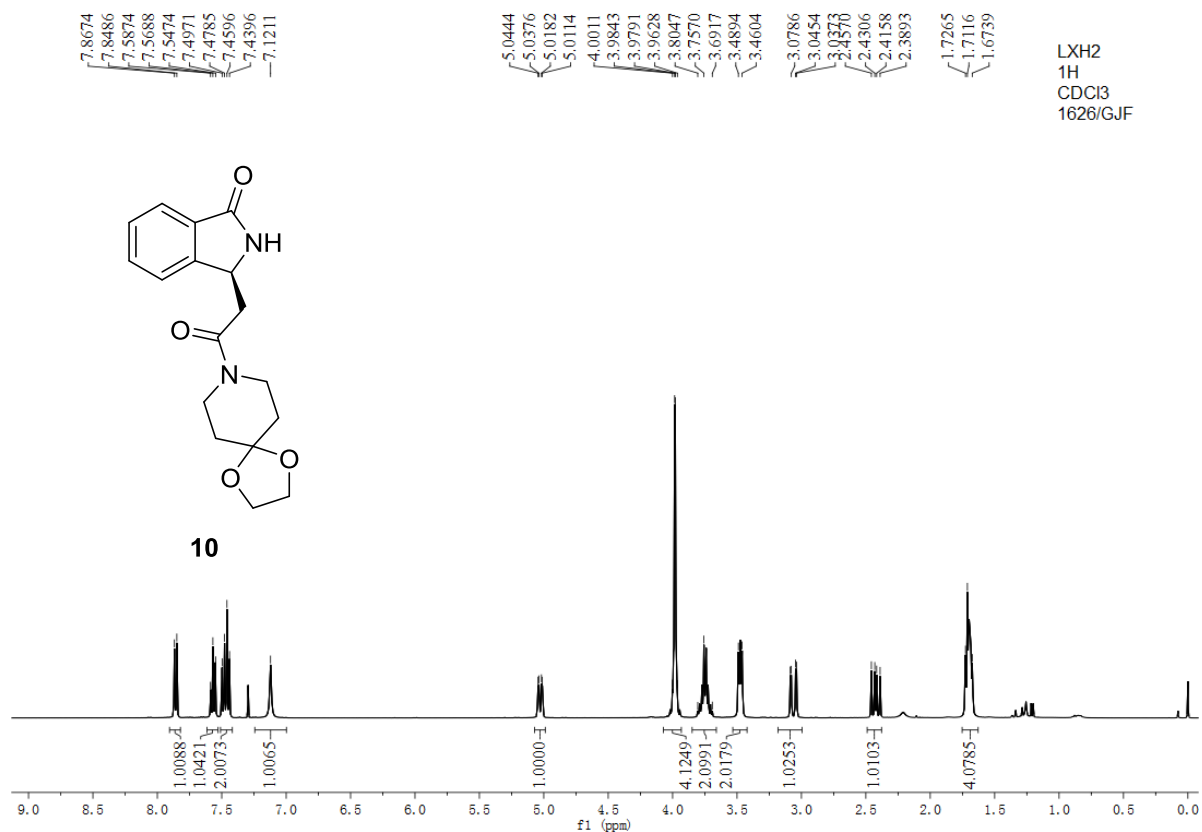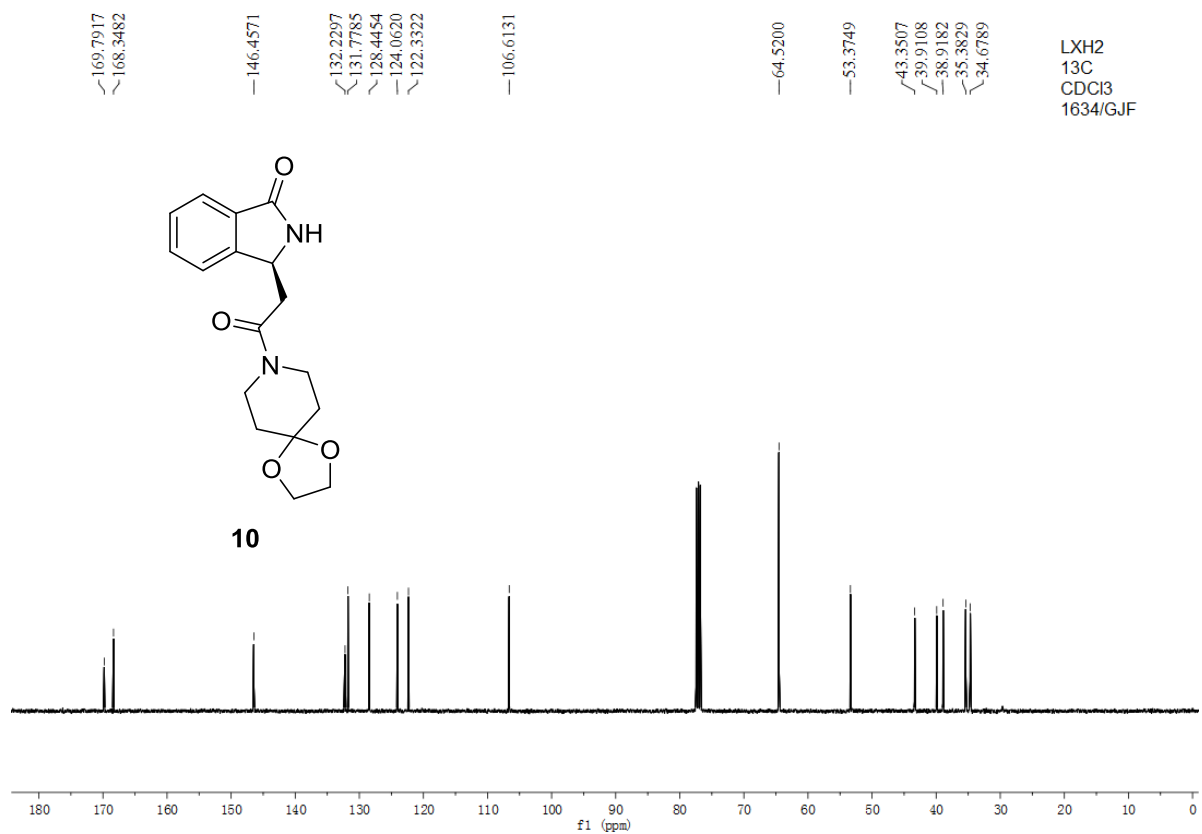

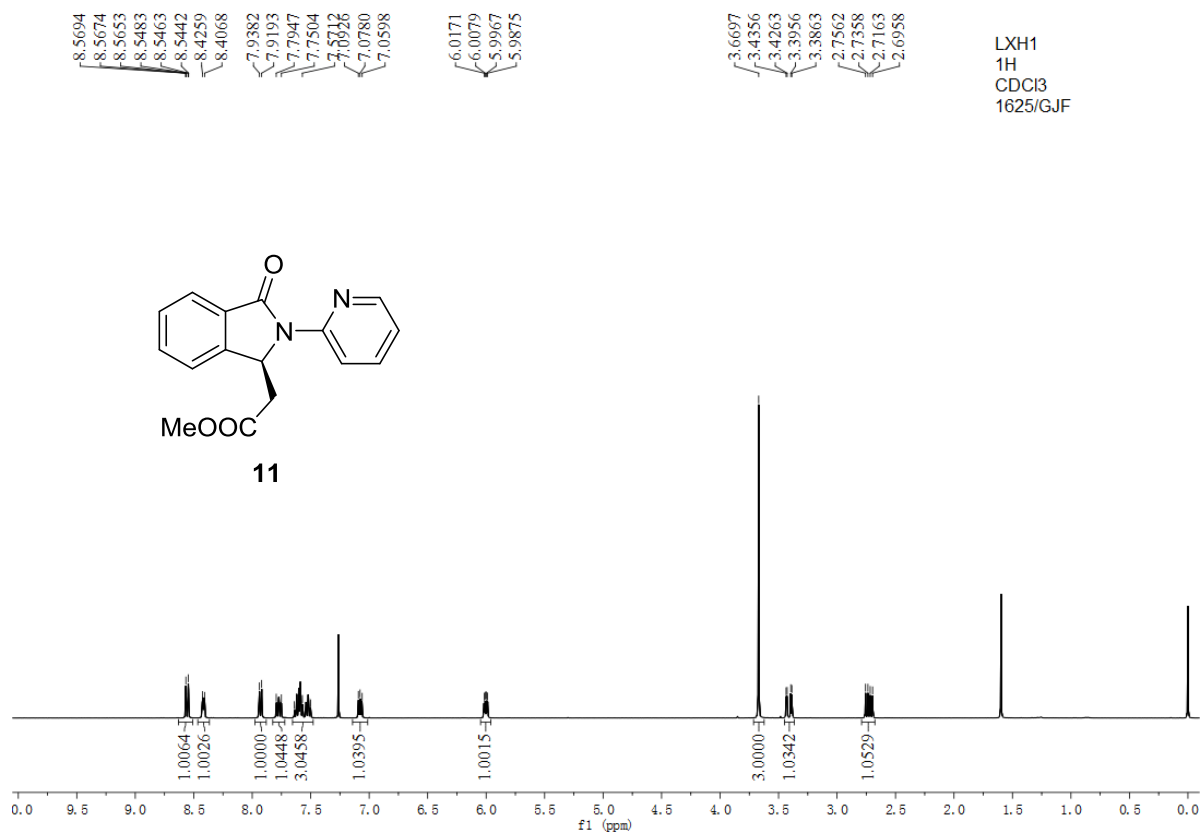

LXH1  
1H  
CDCl3  
1625/GJF

$^1\text{H}$  NMR (400 MHz,  $\text{CDCl}_3$ ) of **11**

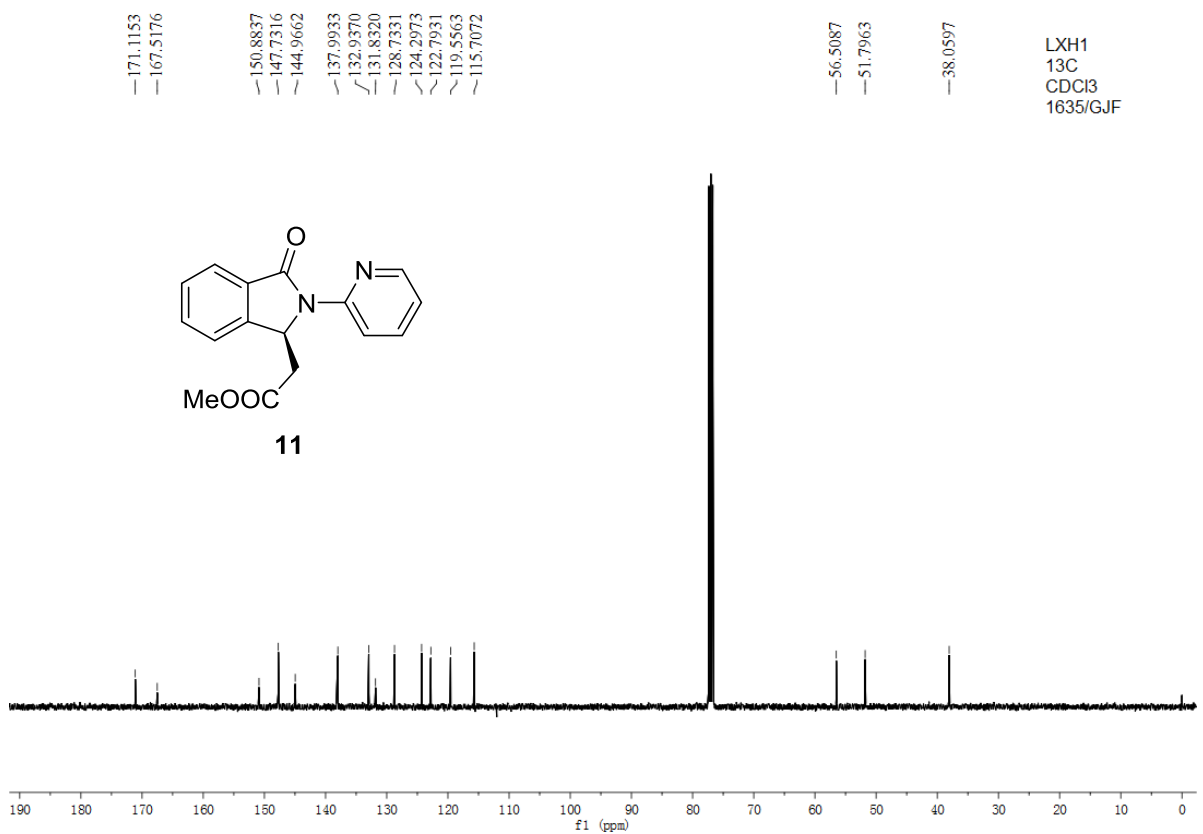

LXH1  
13C  
CDCl3  
1635/GJF

$^{13}\text{C}\{^1\text{H}\}$  NMR (100 MHz,  $\text{CDCl}_3$ ) of **11**

## HPLC Spectra.

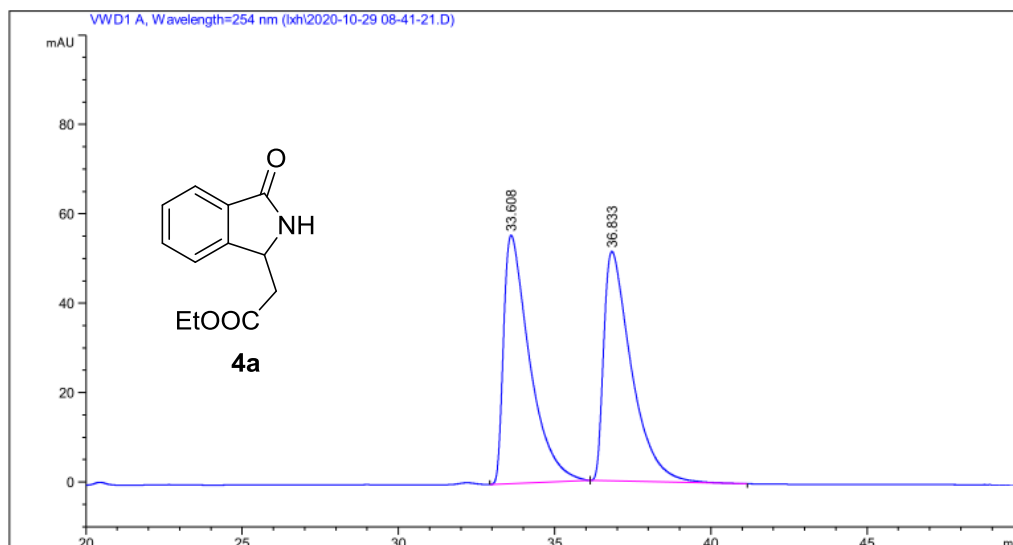

| PeakNO. | Ret.Time | PeakHeight | PeakArea   | Area%   |
|---------|----------|------------|------------|---------|
| 1       | 33.608   | 55.60484   | 3224.21680 | 50.4983 |
| 2       | 36.833   | 51.36386   | 3160.58936 | 49.5017 |

Chiral HPLC chromatogram for racemic **4a**

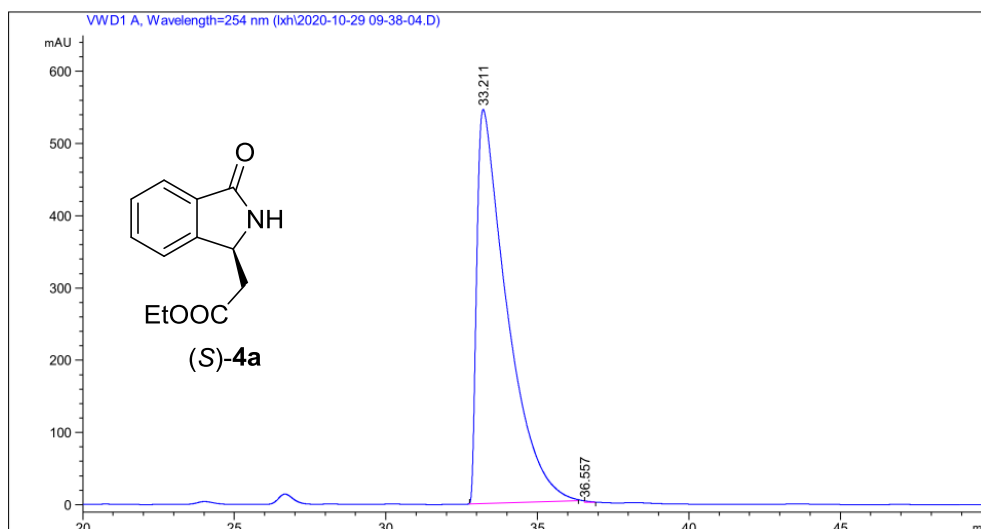

| PeakNO. | Ret.Time | PeakHeight | PeakArea  | Area%   |
|---------|----------|------------|-----------|---------|
| 1       | 33.211   | 545.38116  | 3.76698e4 | 99.9560 |
| 2       | 36.557   | 1.73080    | 16.57049  | 0.0440  |

Chiral HPLC chromatogram for enantioenriched **(S)-4a**

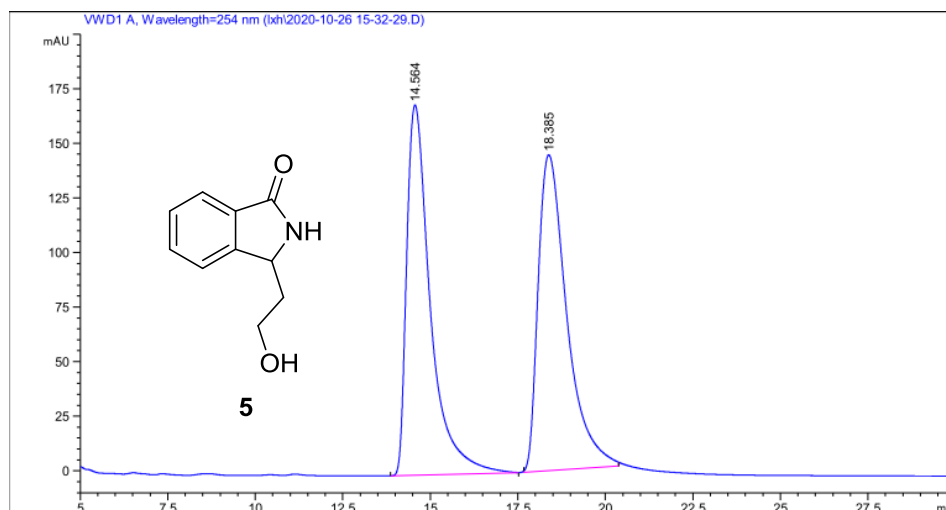

| PeakNO. | Ret.Time | PeakHeight | PeakArea   | Area%   |
|---------|----------|------------|------------|---------|
| 1       | 14.564   | 169.56108  | 7965.42432 | 49.2525 |
| 2       | 18.385   | 144.59998  | 8207.21387 | 50.7475 |

**Chiral HPLC chromatogram for racemic 5**

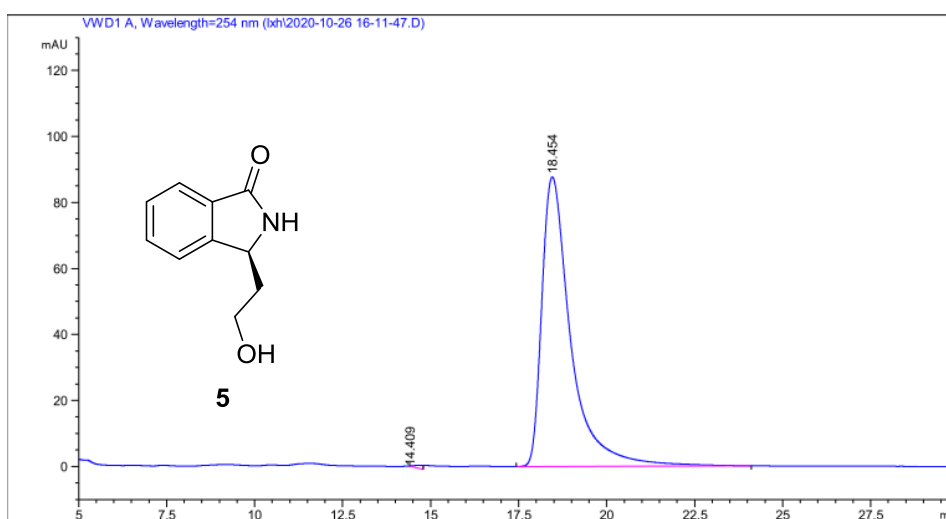

| PeakNO. | Ret.Time | PeakHeight | PeakArea   | Area%   |
|---------|----------|------------|------------|---------|
| 1       | 14.409   | 3.64892e-2 | 15.71862   | 0.3121  |
| 2       | 18.454   | 87.75197   | 5020.24023 | 99.6879 |

**Chiral HPLC chromatogram for enantioenriched 5**

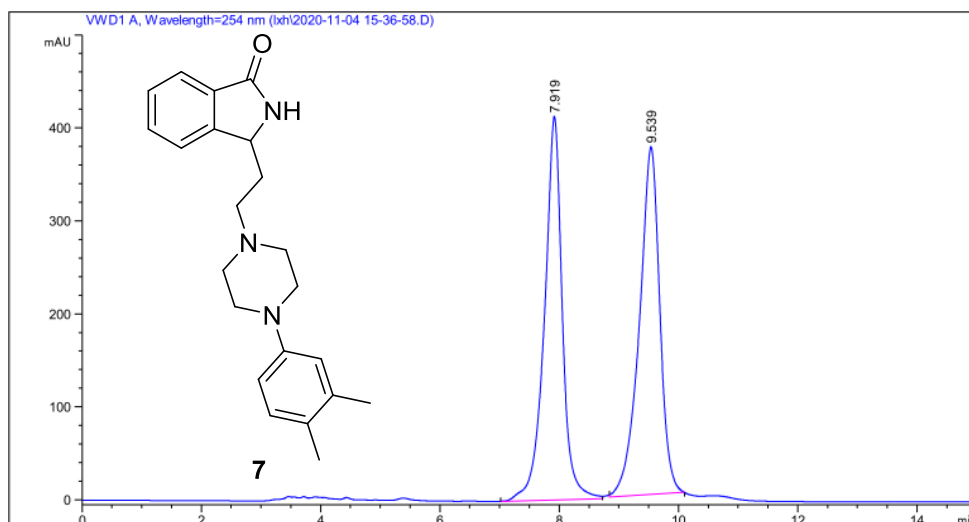

| PeakNO. | Ret.Time | PeakHeight | PeakArea   | Area%   |
|---------|----------|------------|------------|---------|
| 1       | 7.919    | 412.30762  | 8576.43945 | 49.1058 |
| 2       | 9.539    | 373.75912  | 8888.79102 | 50.8942 |

**Chiral HPLC chromatogram for racemic 7**

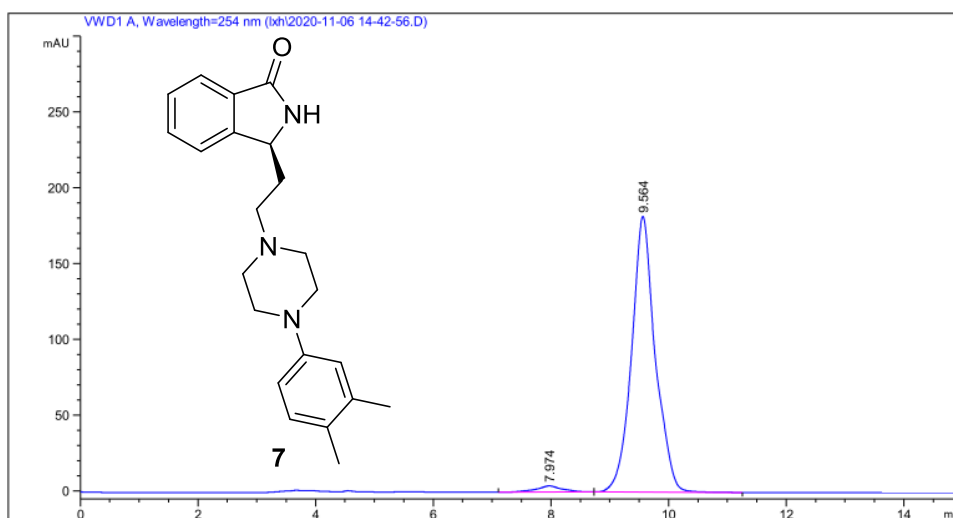

| PeakNO. | Ret.Time | PeakHeight | PeakArea   | Area%   |
|---------|----------|------------|------------|---------|
| 1       | 7.974    | 4.10645    | 128.32562  | 2.4610  |
| 2       | 9.564    | 181.66975  | 5086.11035 | 97.5390 |

**Chiral HPLC chromatogram for enantioenriched 7**

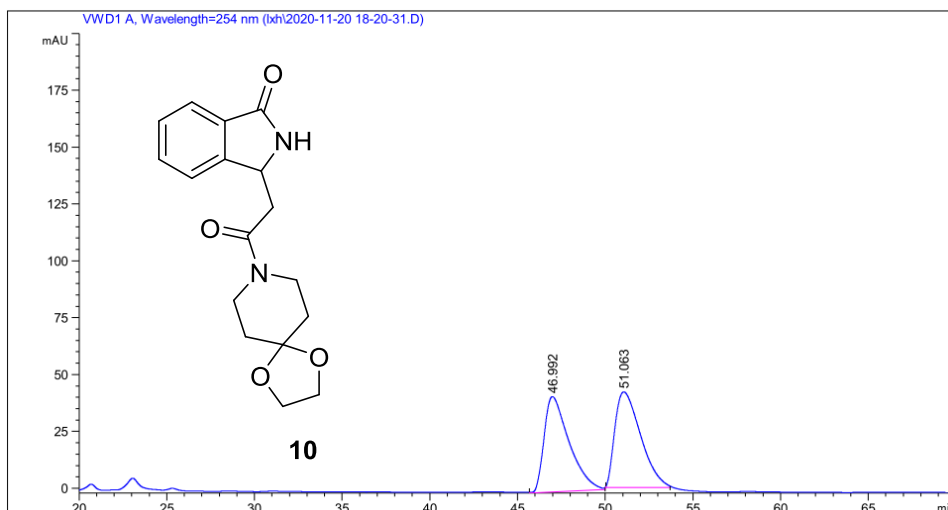

| PeakNO. | Ret.Time | PeakHeight | PeakArea   | Area%   |
|---------|----------|------------|------------|---------|
| 1       | 46.992   | 41.98966   | 4167.18164 | 49.1988 |
| 2       | 51.063   | 42.11304   | 4302.90430 | 50.8012 |

**Chiral HPLC chromatogram for racemic 10**

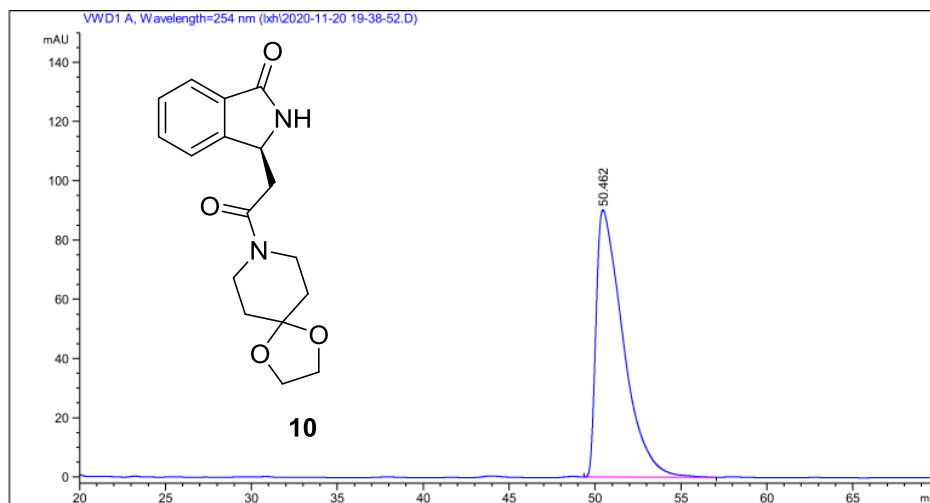

| PeakNO. | Ret.Time | PeakHeight | PeakArea   | Area% |
|---------|----------|------------|------------|-------|
| 1       | 50.462   | 90.15623   | 9818.70215 | 100   |

**Chiral HPLC chromatogram for enantioenriched 10**



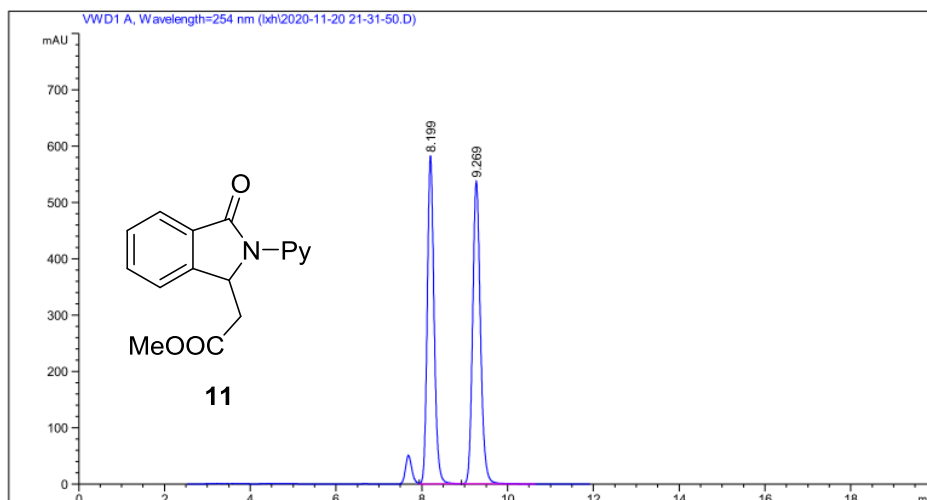

| PeakNO. | Ret.Time | PeakHeight | PeakArea   | Area%   |
|---------|----------|------------|------------|---------|
| 1       | 8.199    | 582.74756  | 6411.64014 | 48.5559 |
| 2       | 9.269    | 537.28802  | 6793.02295 | 51.4441 |

**Chiral HPLC chromatogram for racemic 11**

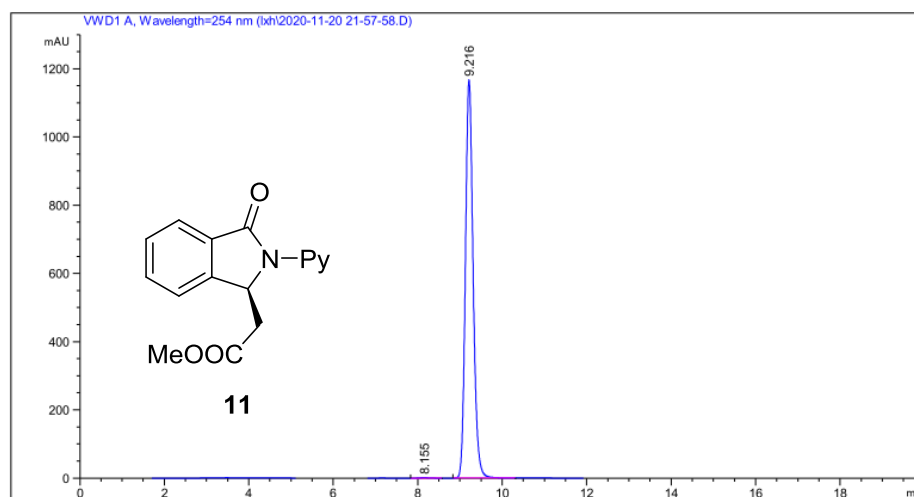

| PeakNO. | Ret.Time | PeakHeight | PeakArea  | Area%   |
|---------|----------|------------|-----------|---------|
| 1       | 8.155    | 1.86769    | 21.23161  | 0.1432  |
| 2       | 9.216    | 1167.37207 | 1.48092e4 | 99.8568 |

**Chiral HPLC chromatogram for enantioenriched 11**
